# Supplementary material for: The duration, dynamics and determinants of SARS-CoV-2 antibody responses in individual healthcare workers
Source: bioRxiv or medRxiv preprint supplement (doi:10.1101/2020.11.02.20224824), 2020-11-04
Supplement: Supplementary file [file media-2.pdf]

● IgG positive ● IgG negative ● Exclude (before maximum titre)

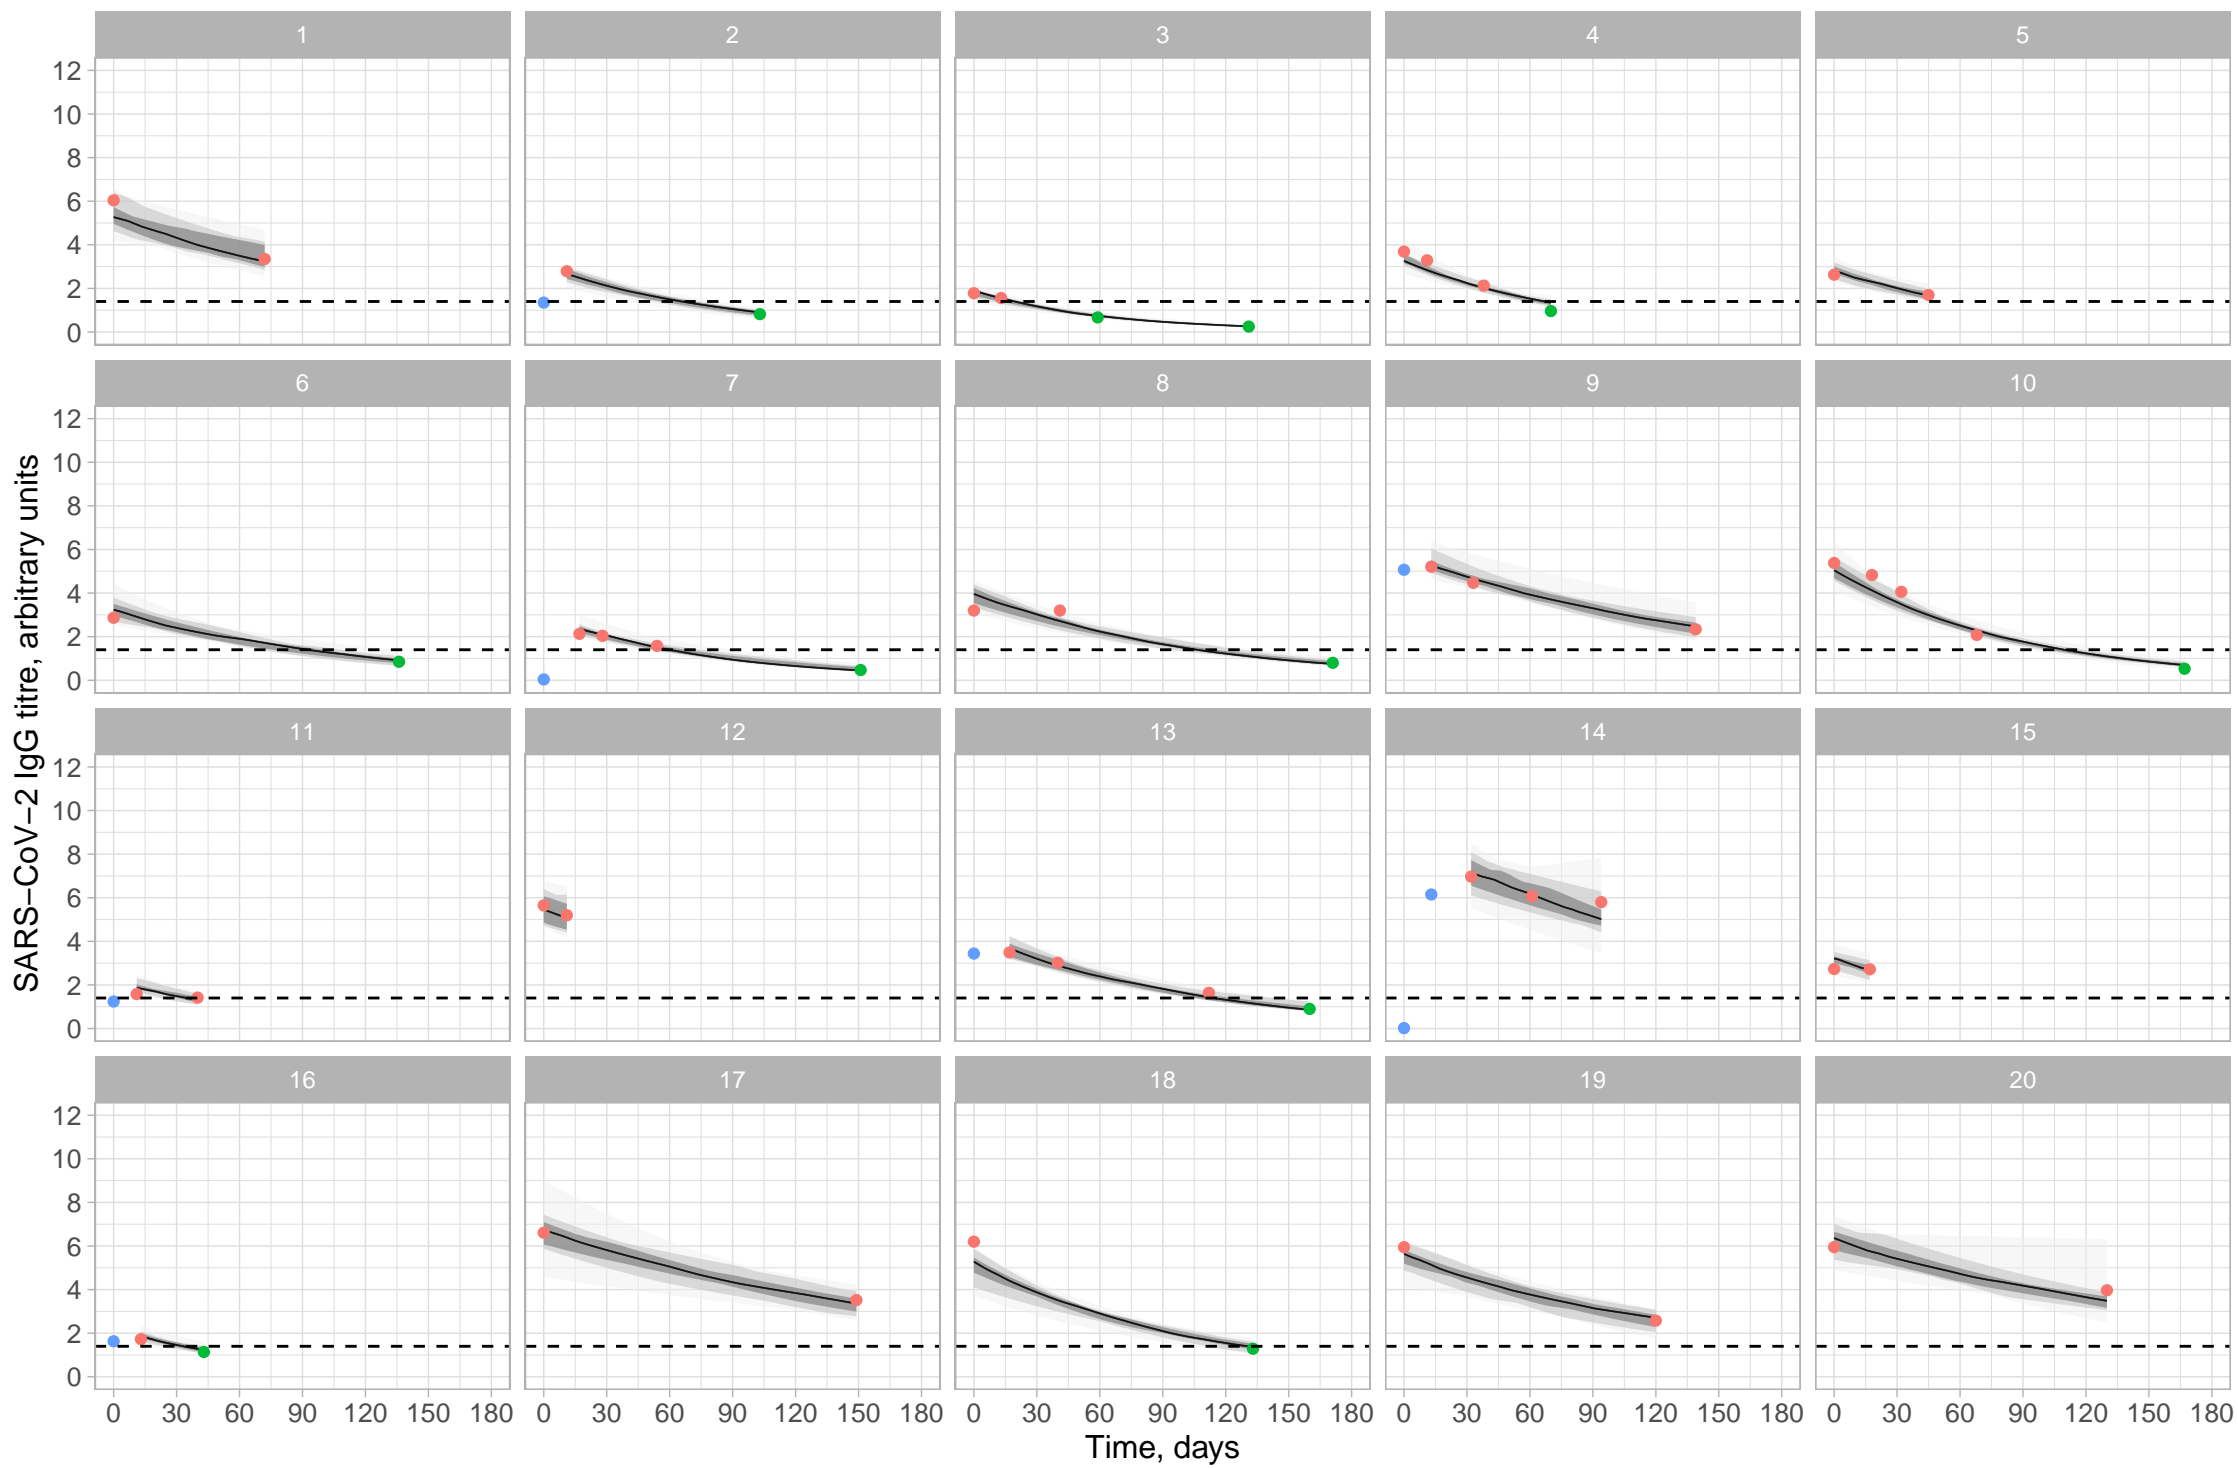

● IgG positive ● IgG negative ● Exclude (before maximum titre)

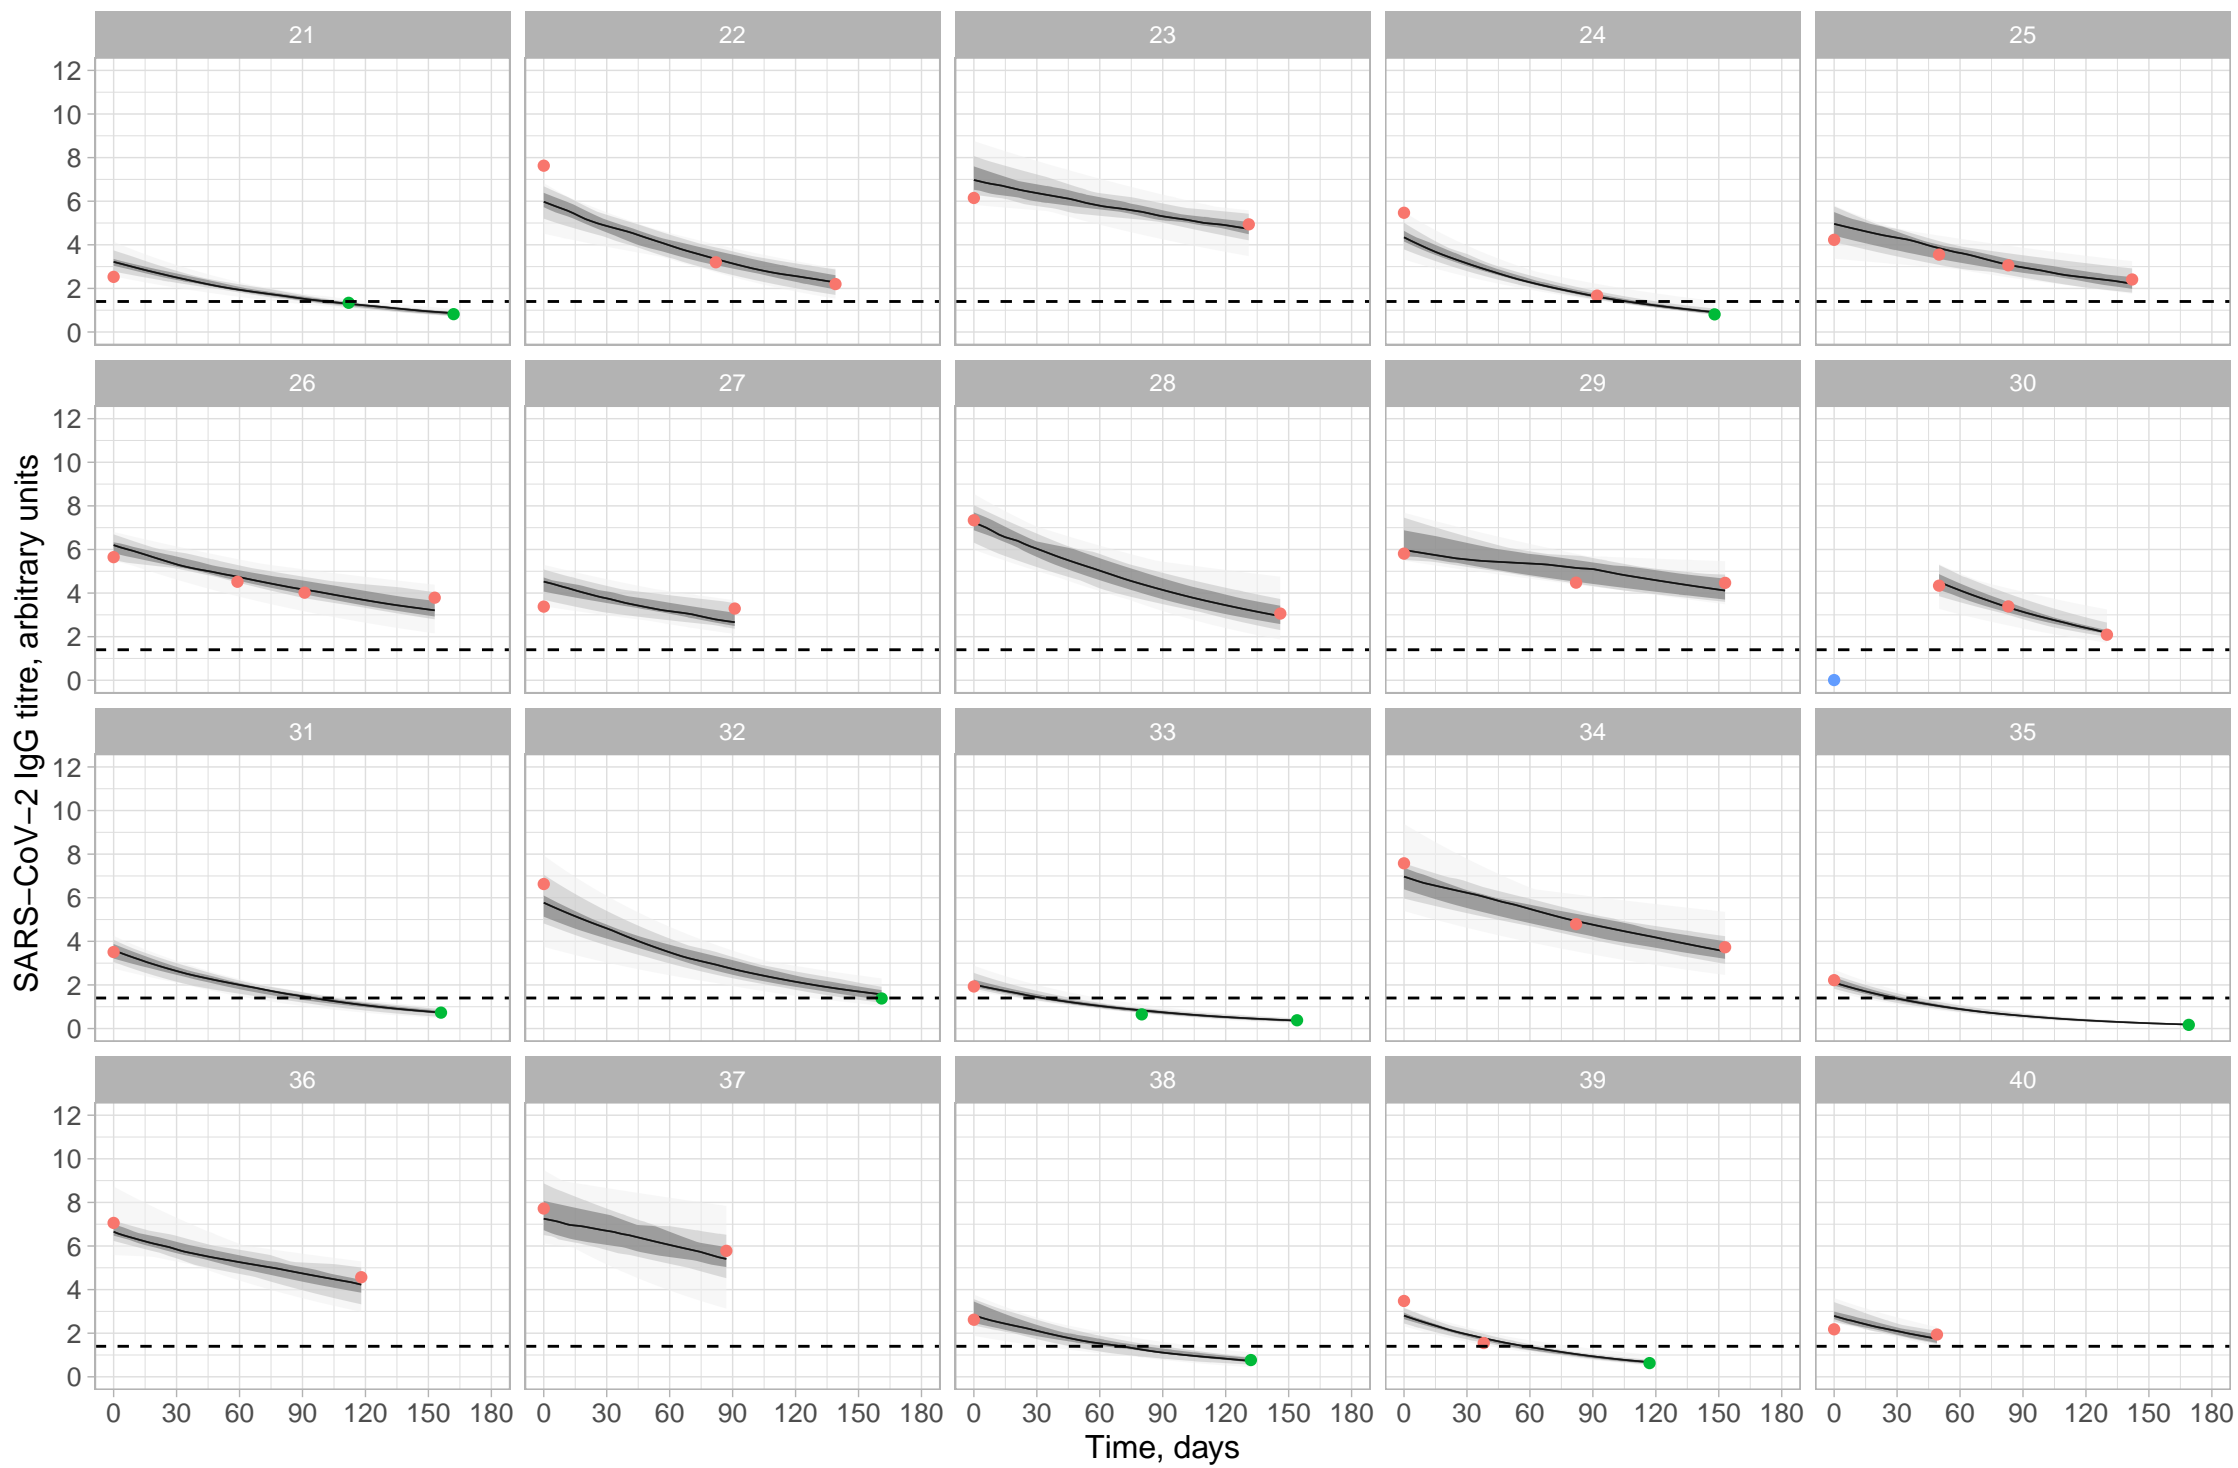

● IgG positive ● IgG negative ● Exclude (before maximum titre)

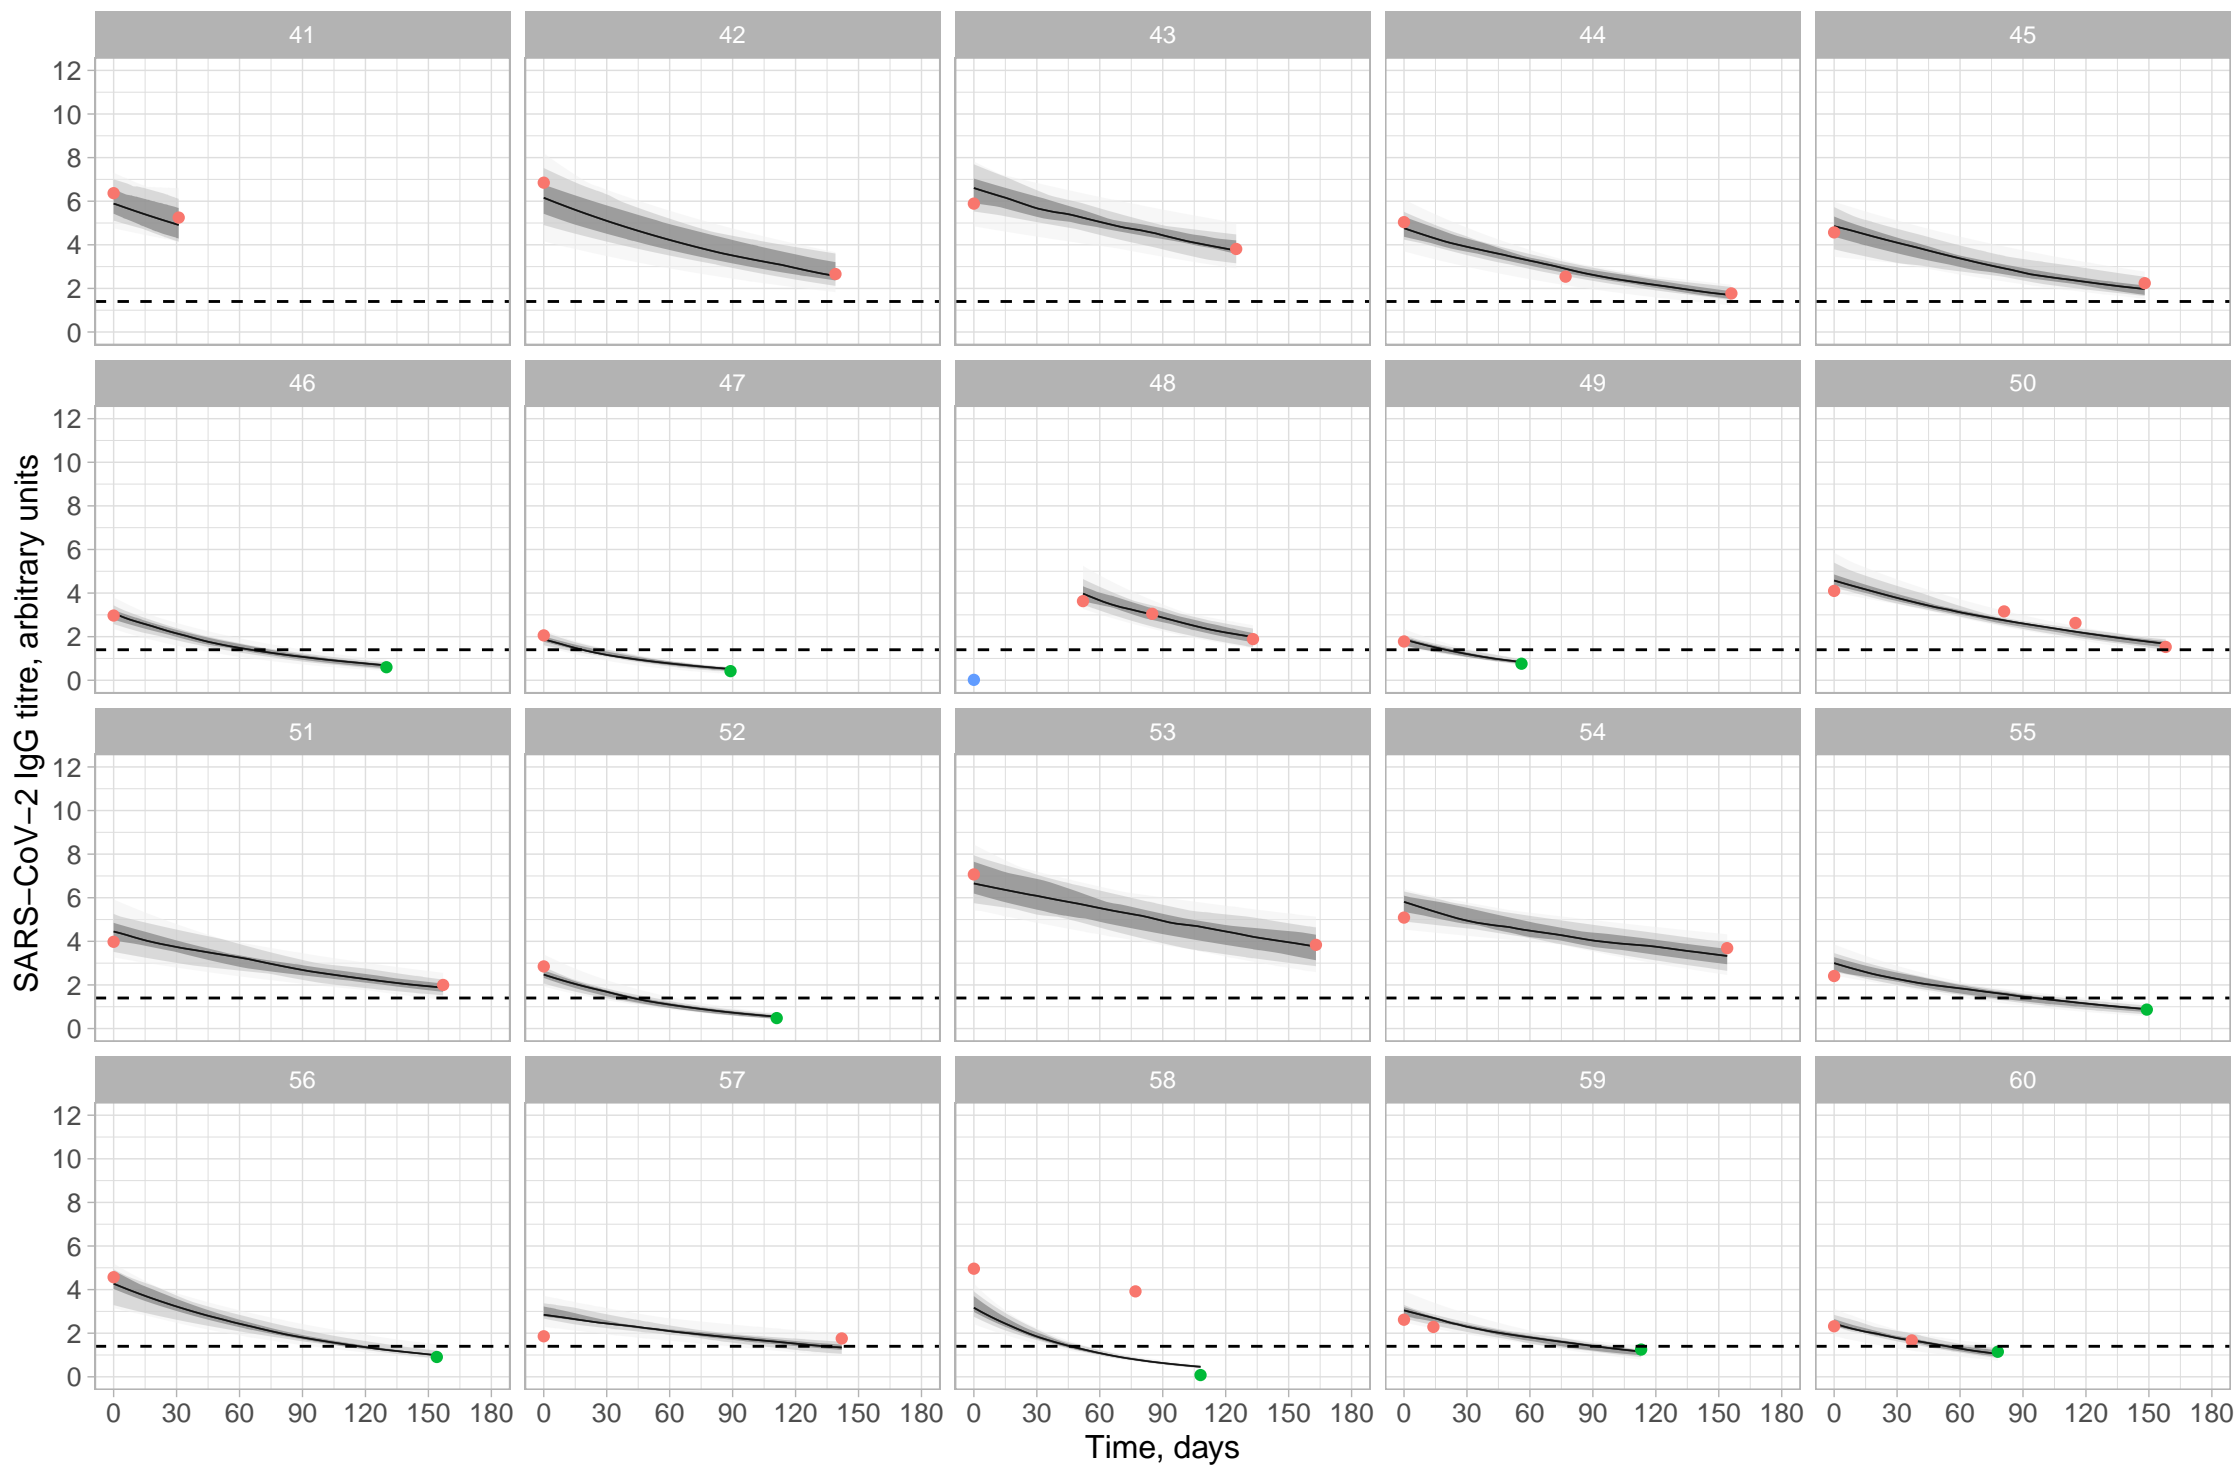

● IgG positive ● IgG negative ● Exclude (before maximum titre)

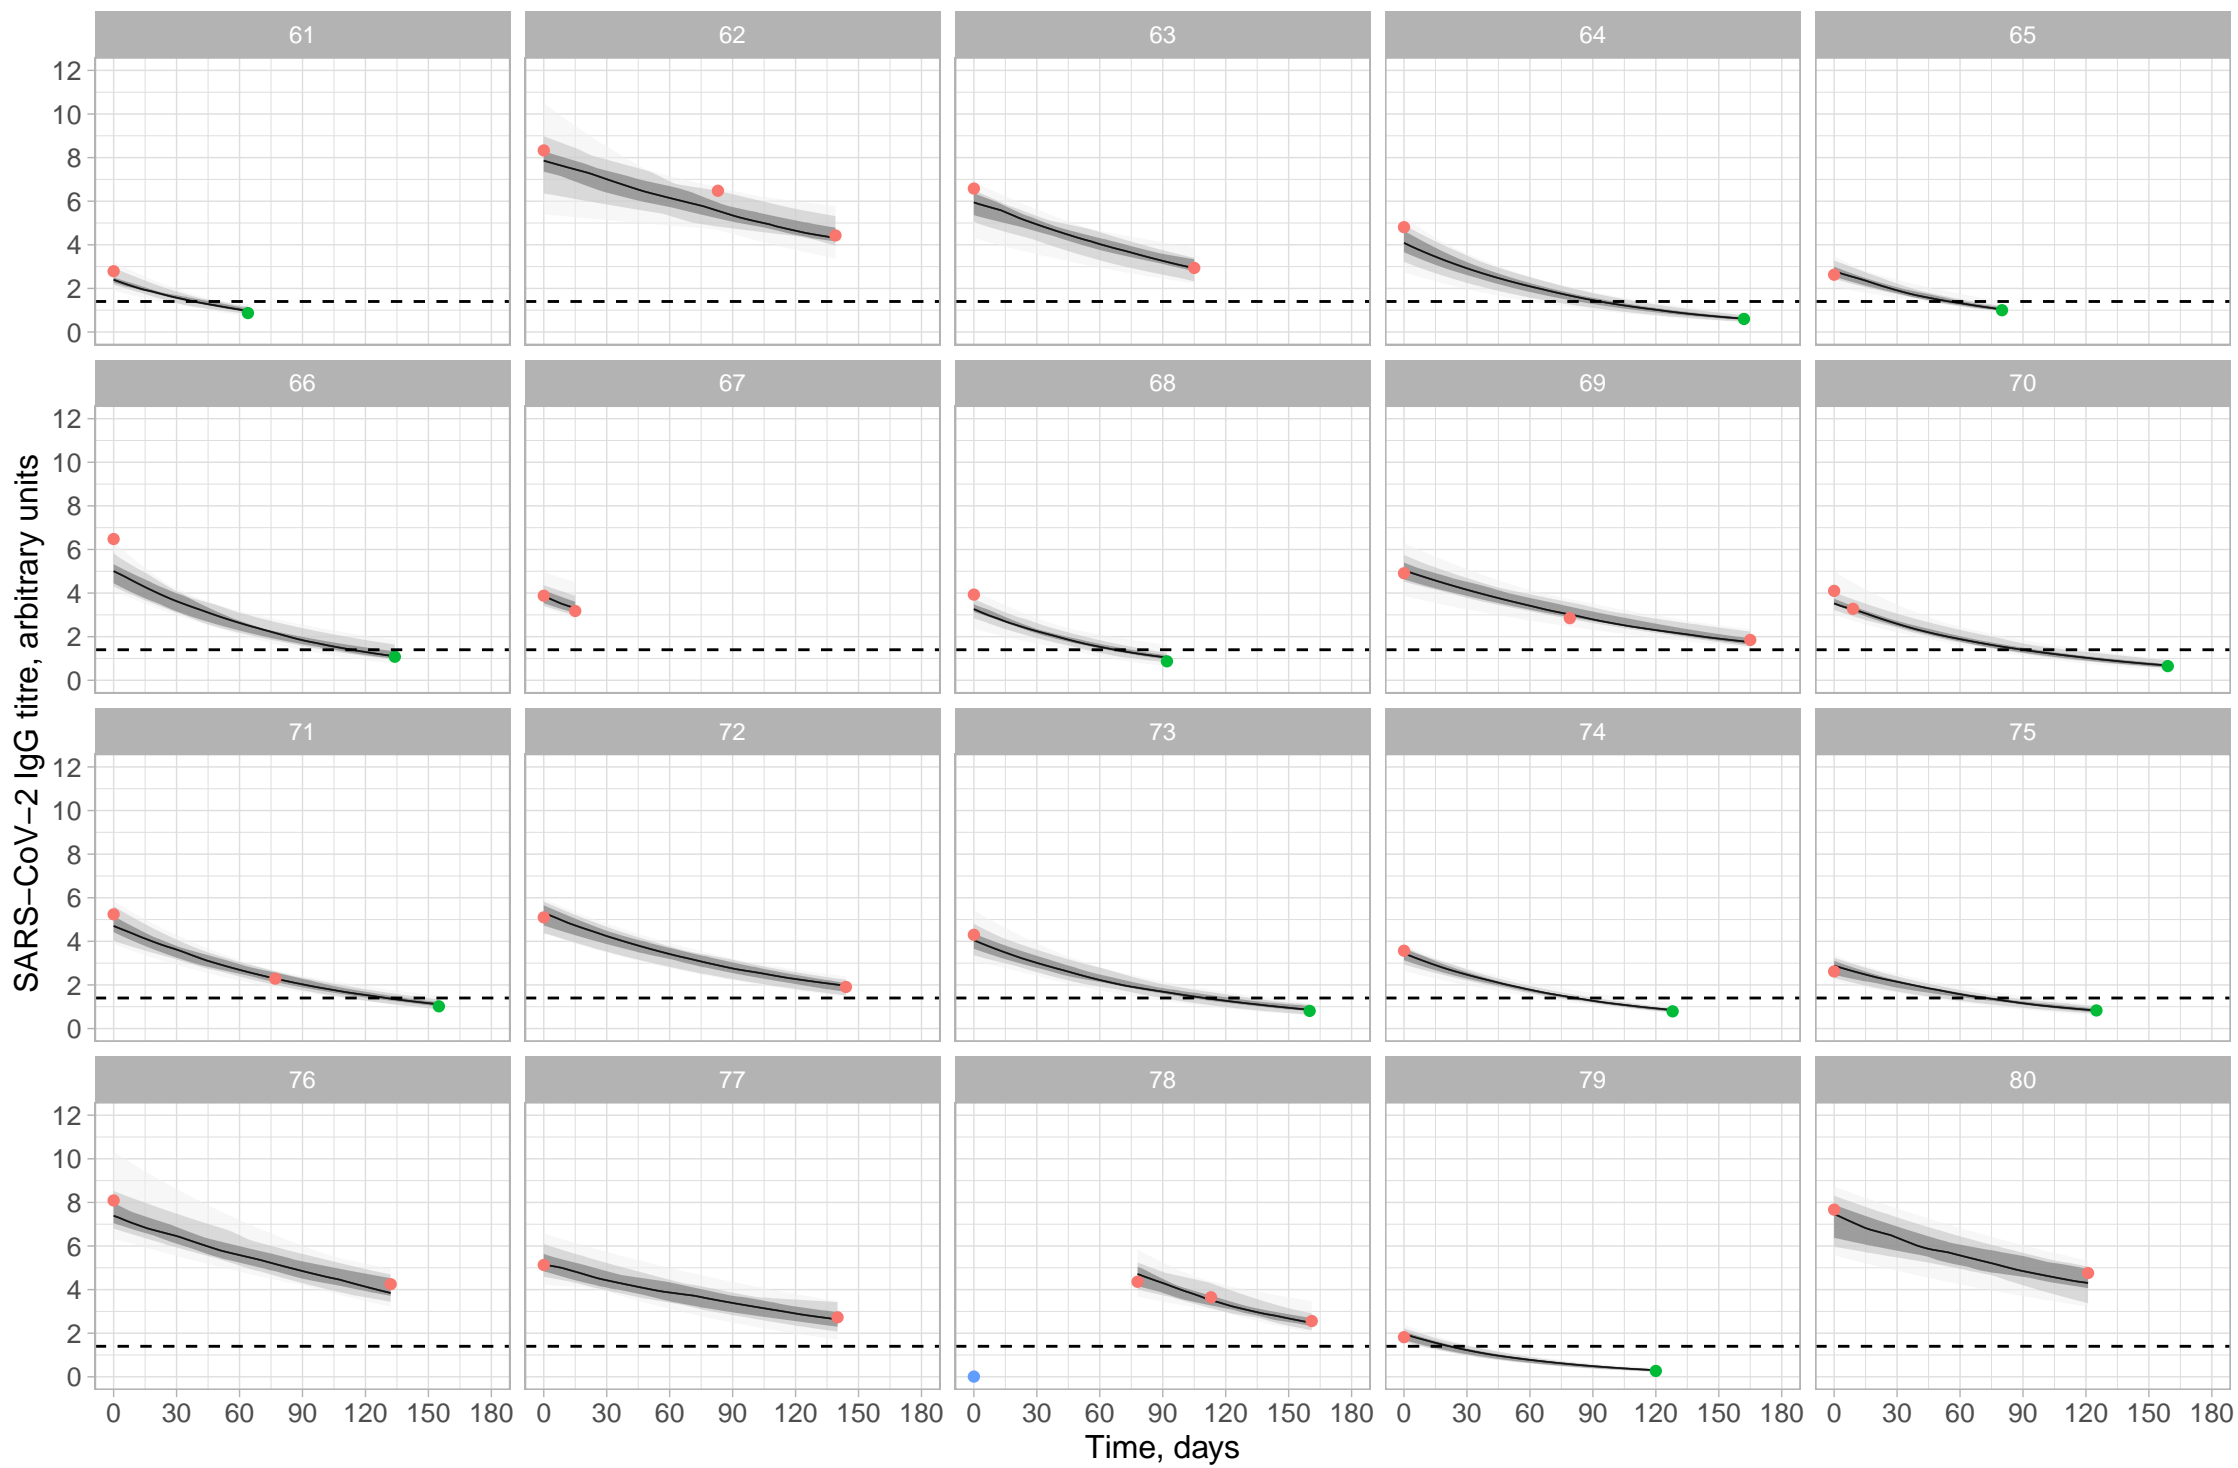

● IgG positive ● IgG negative ● Exclude (before maximum titre)

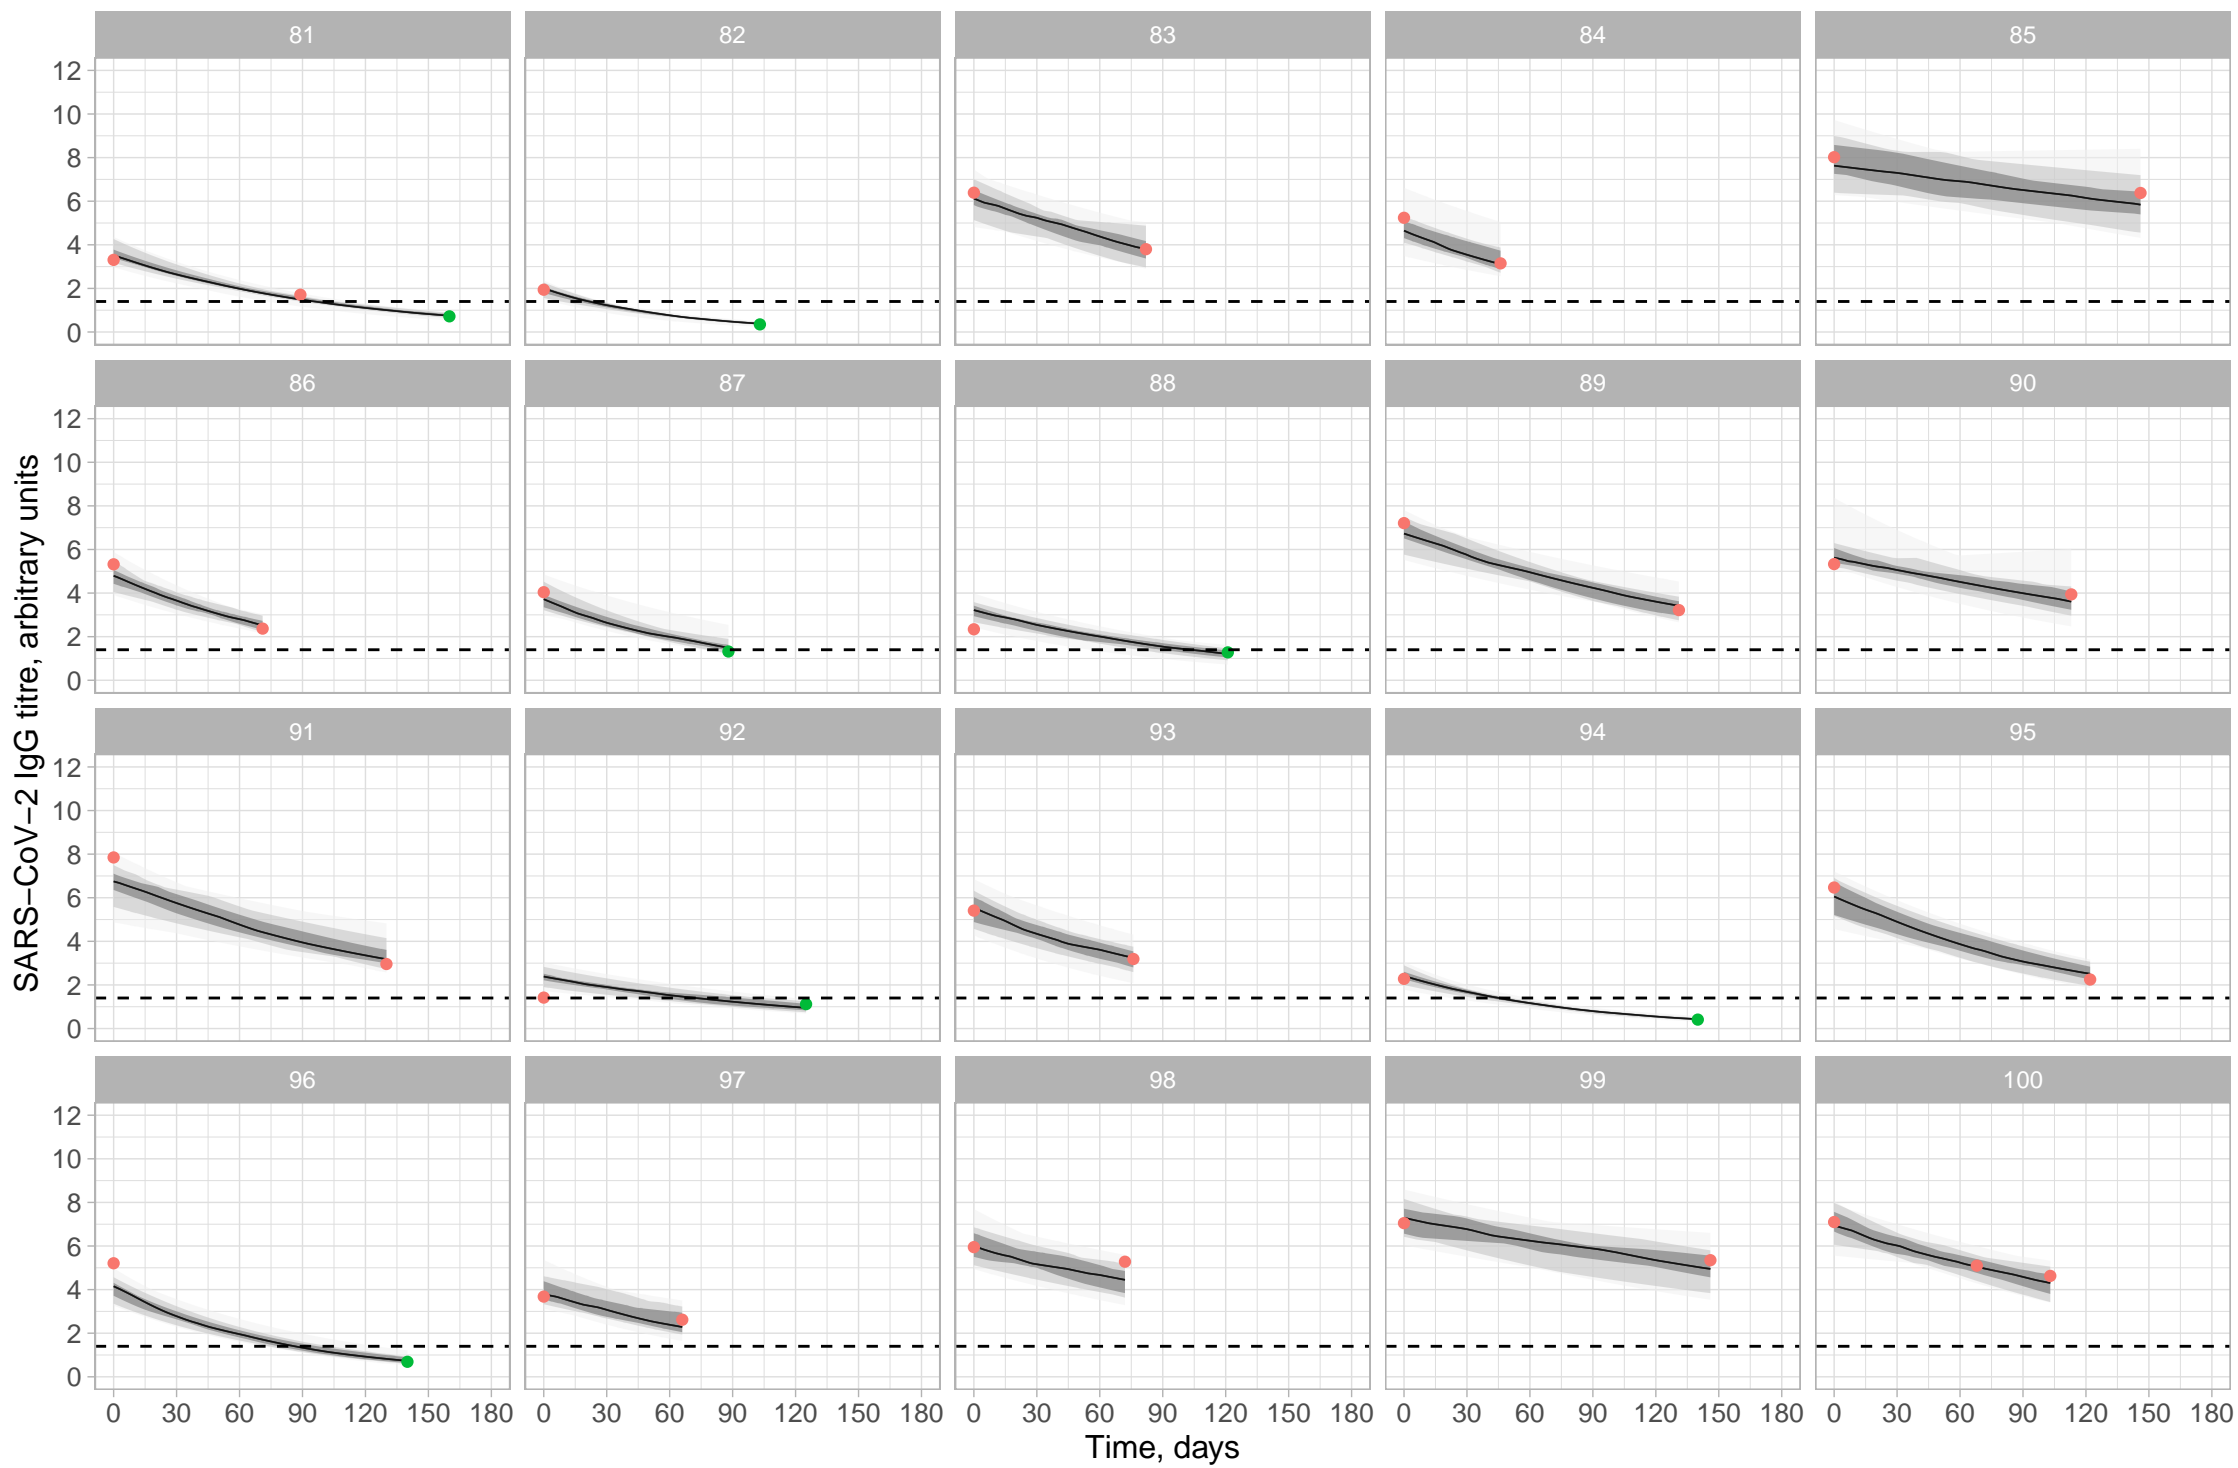

● IgG positive ● IgG negative ● Exclude (before maximum titre)

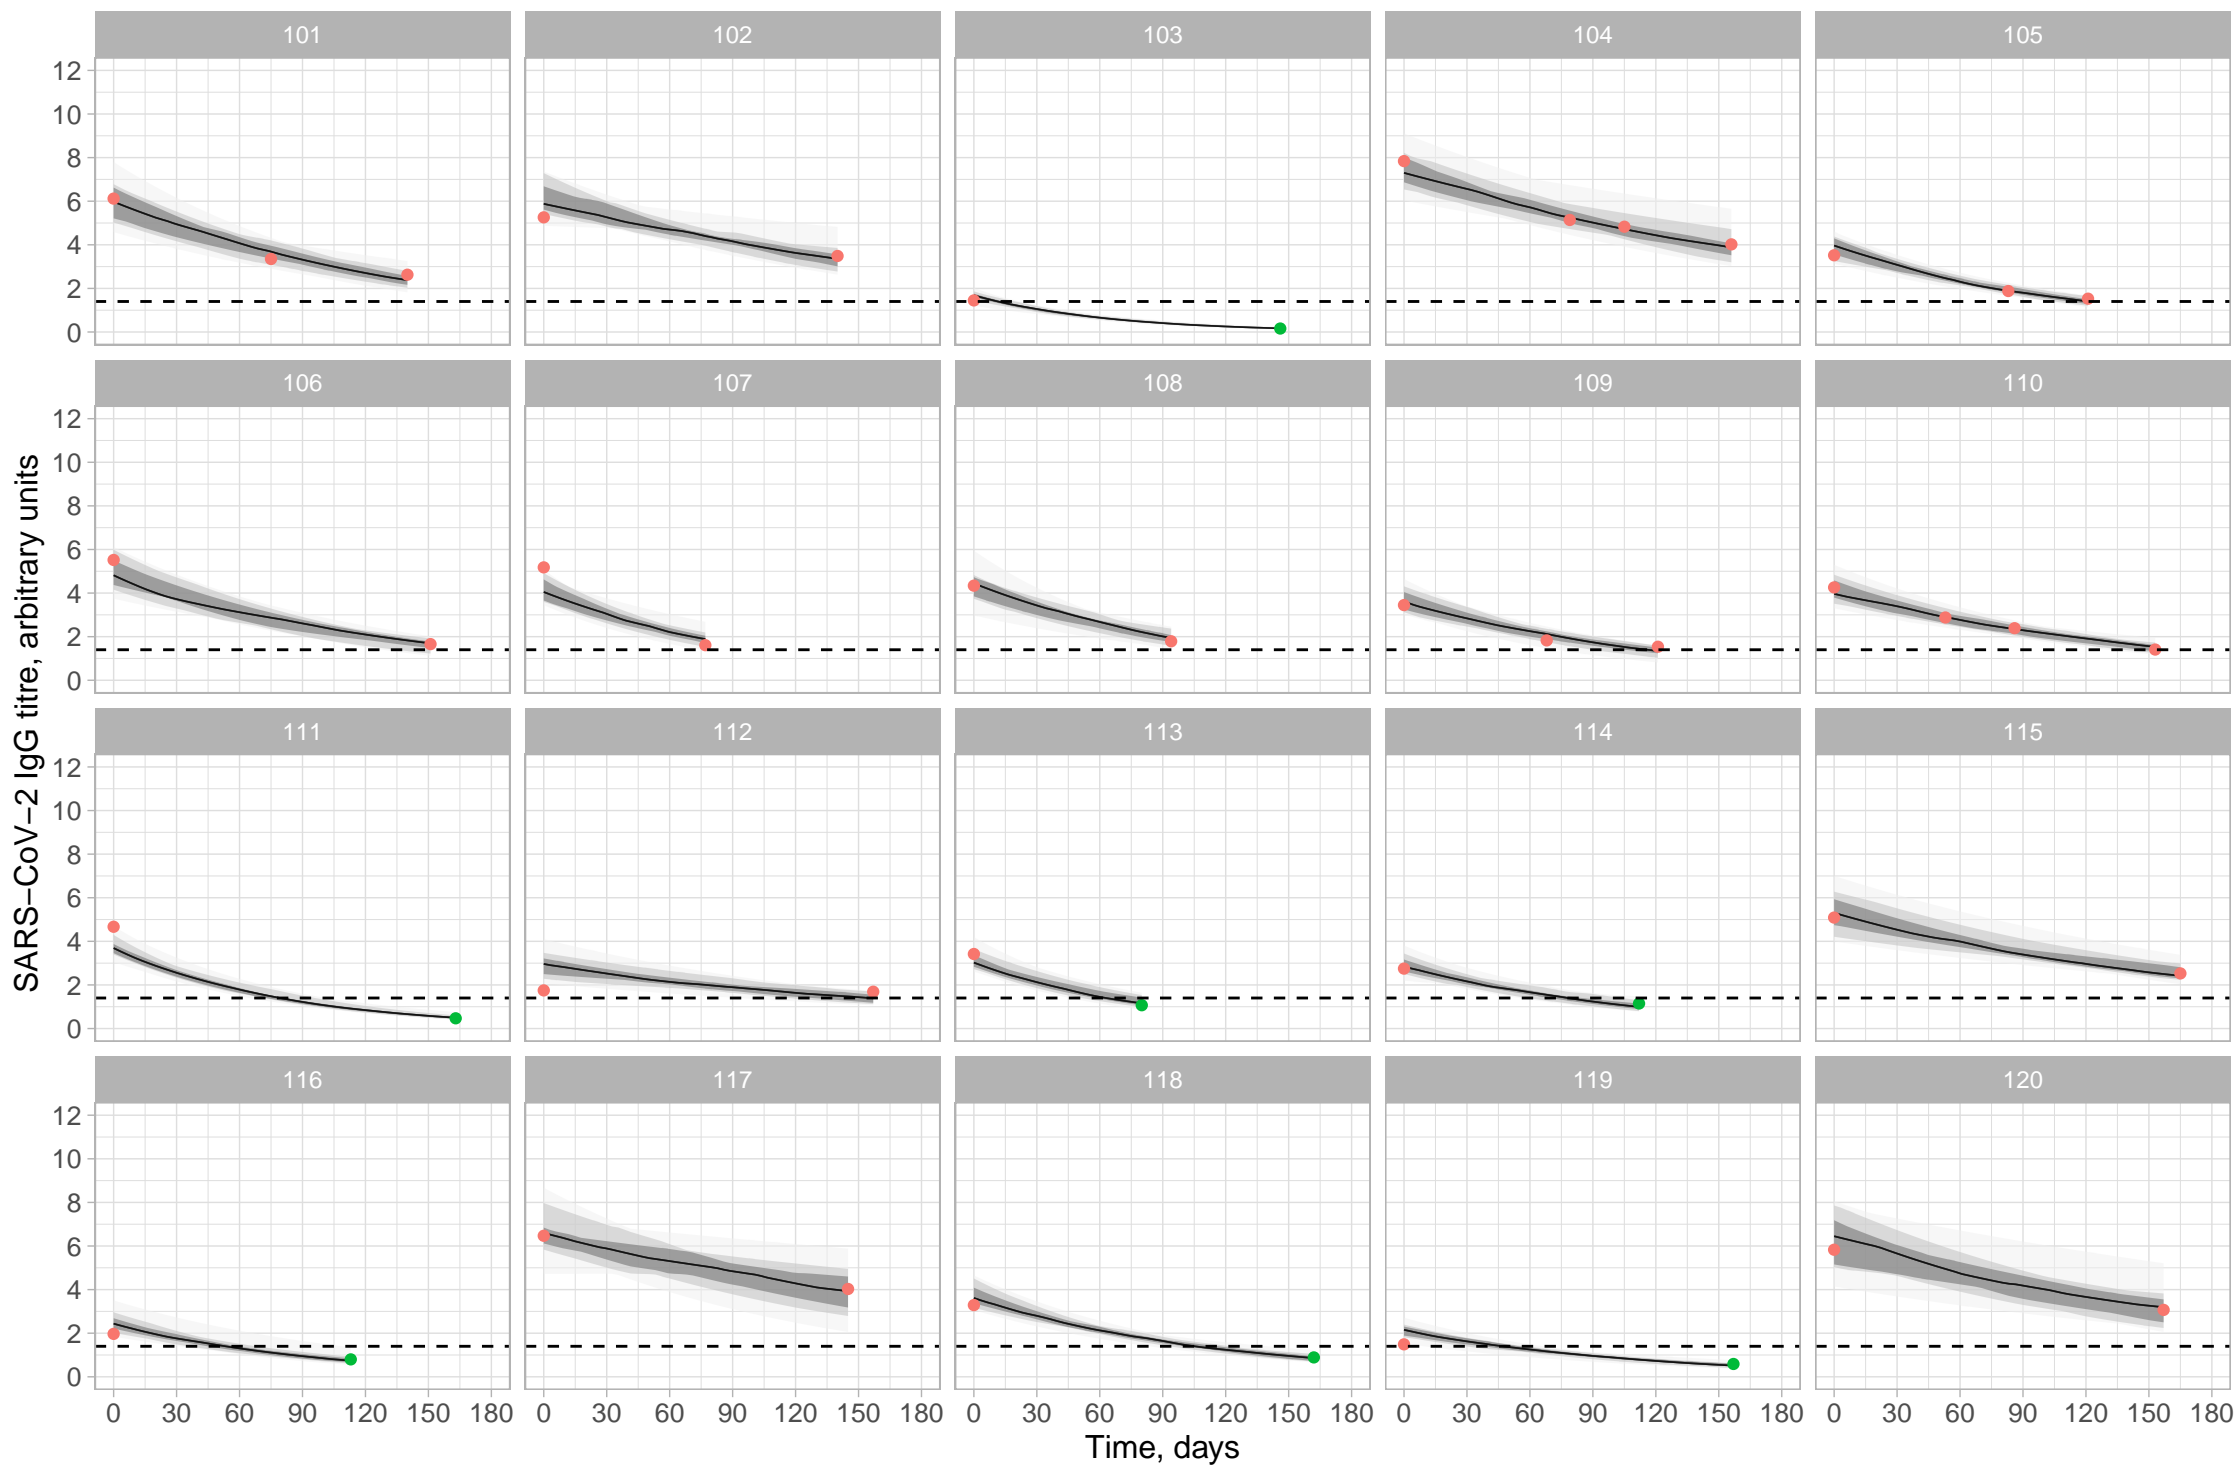

● IgG positive ● IgG negative ● Exclude (before maximum titre)

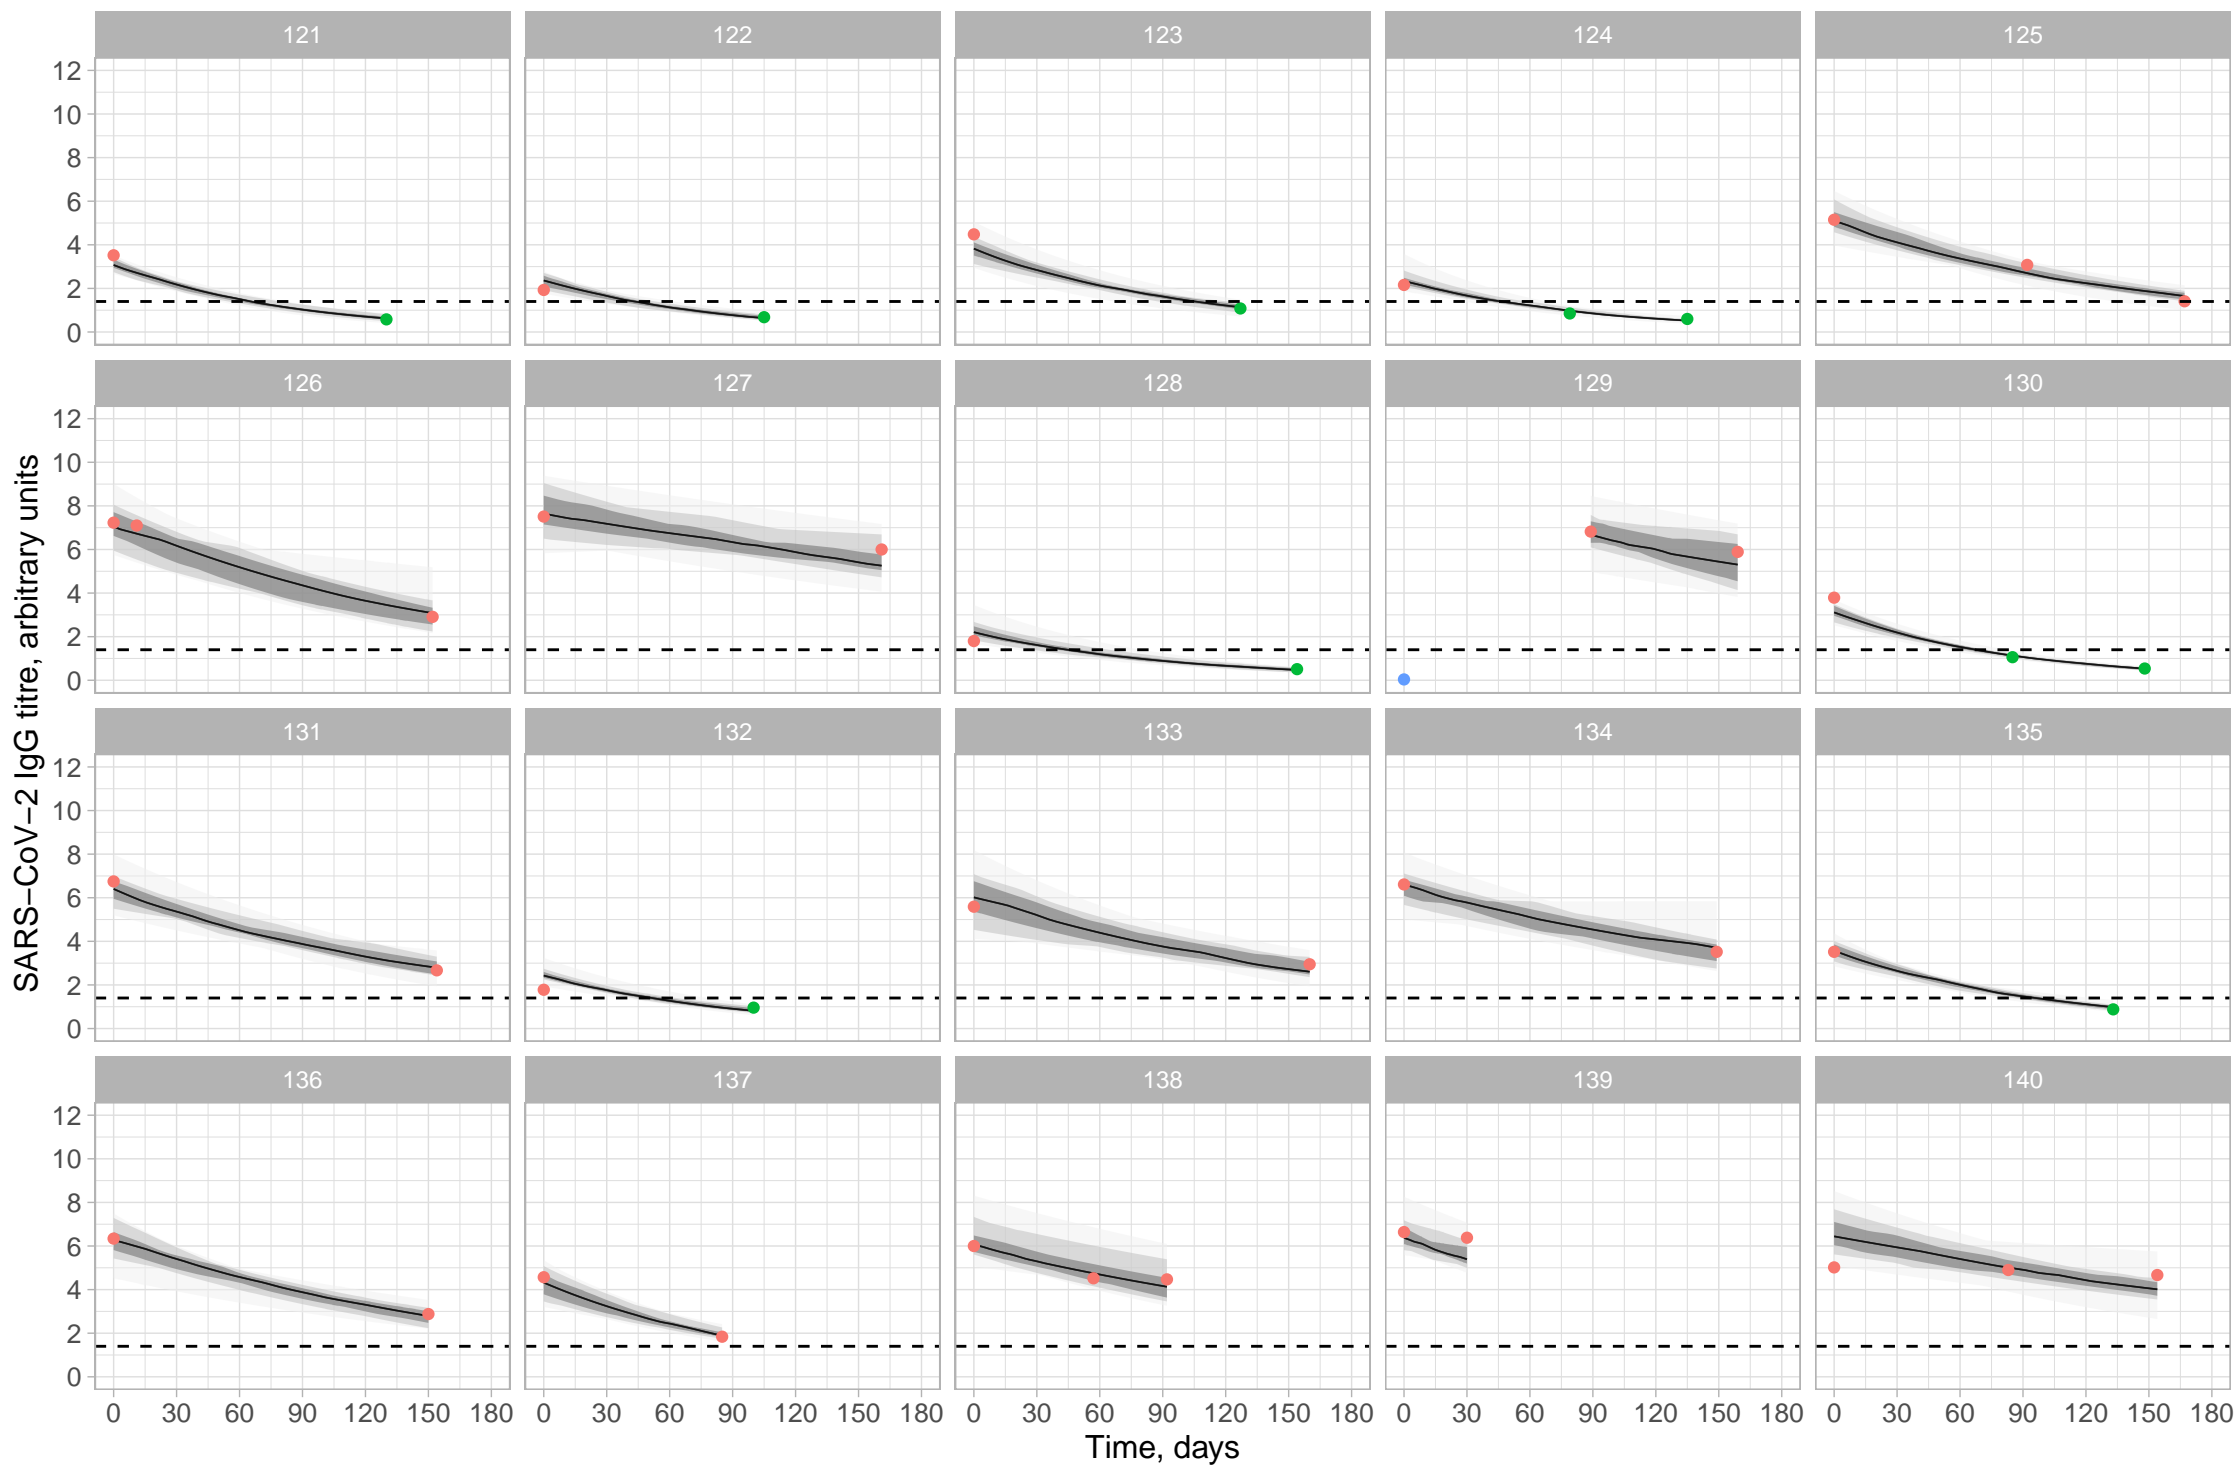

● IgG positive ● IgG negative ● Exclude (before maximum titre)

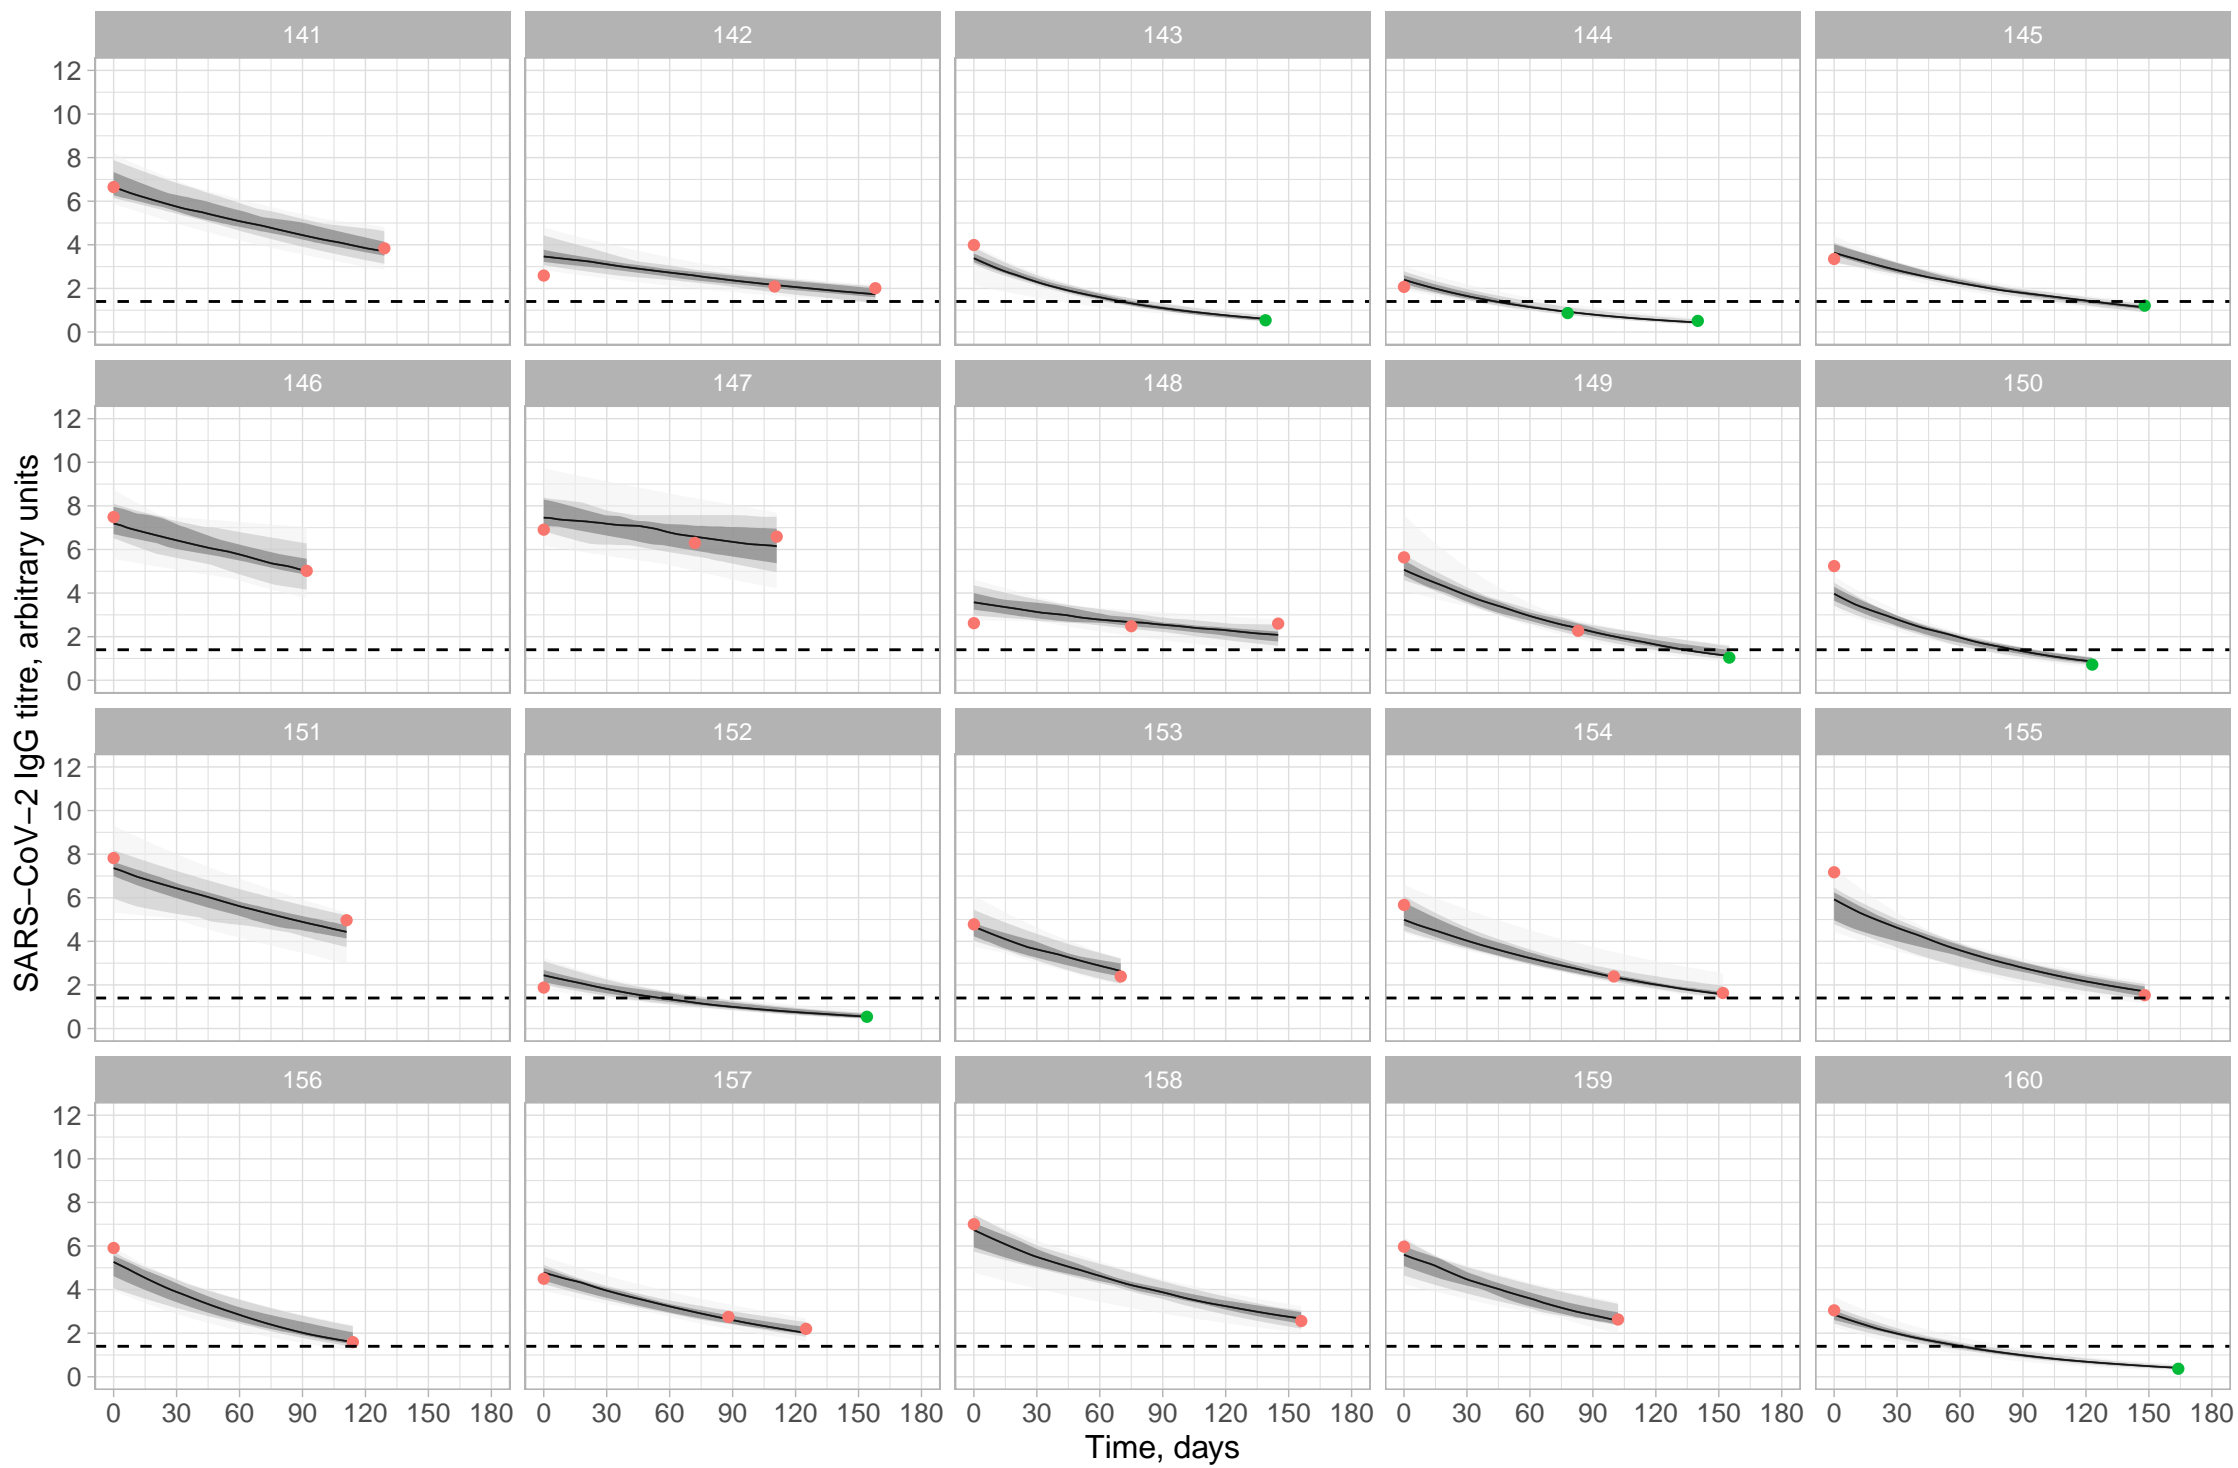



● IgG positive ● IgG negative ● Exclude (before maximum titre)

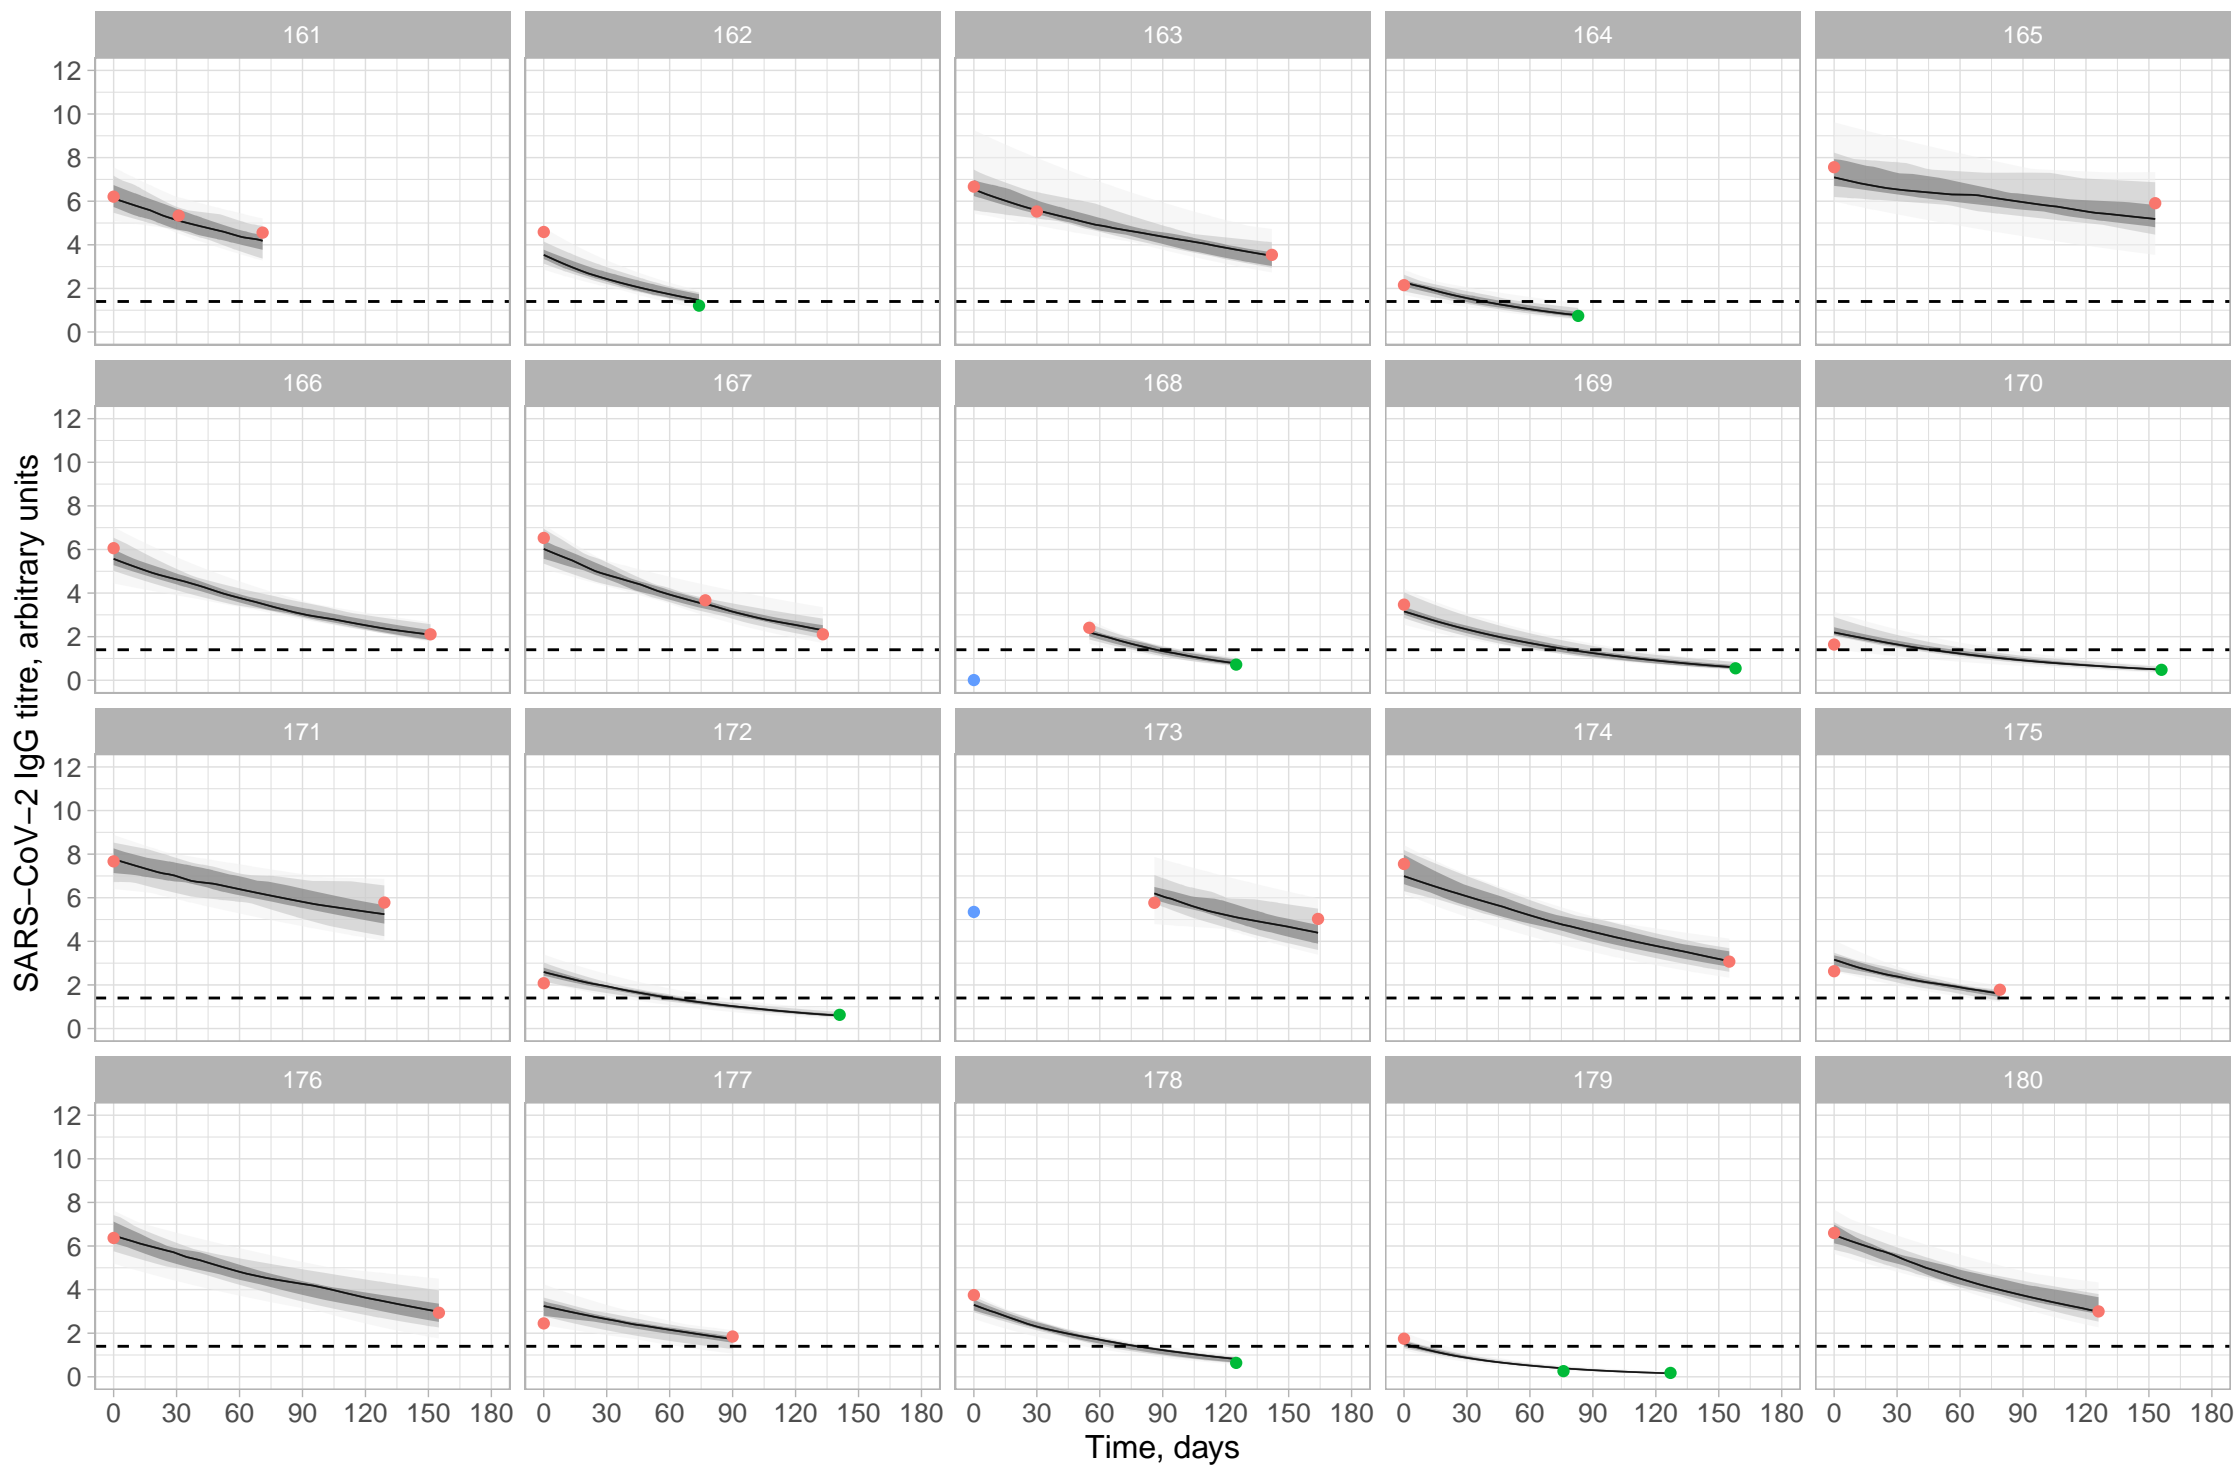

● IgG positive ● IgG negative ● Exclude (before maximum titre)

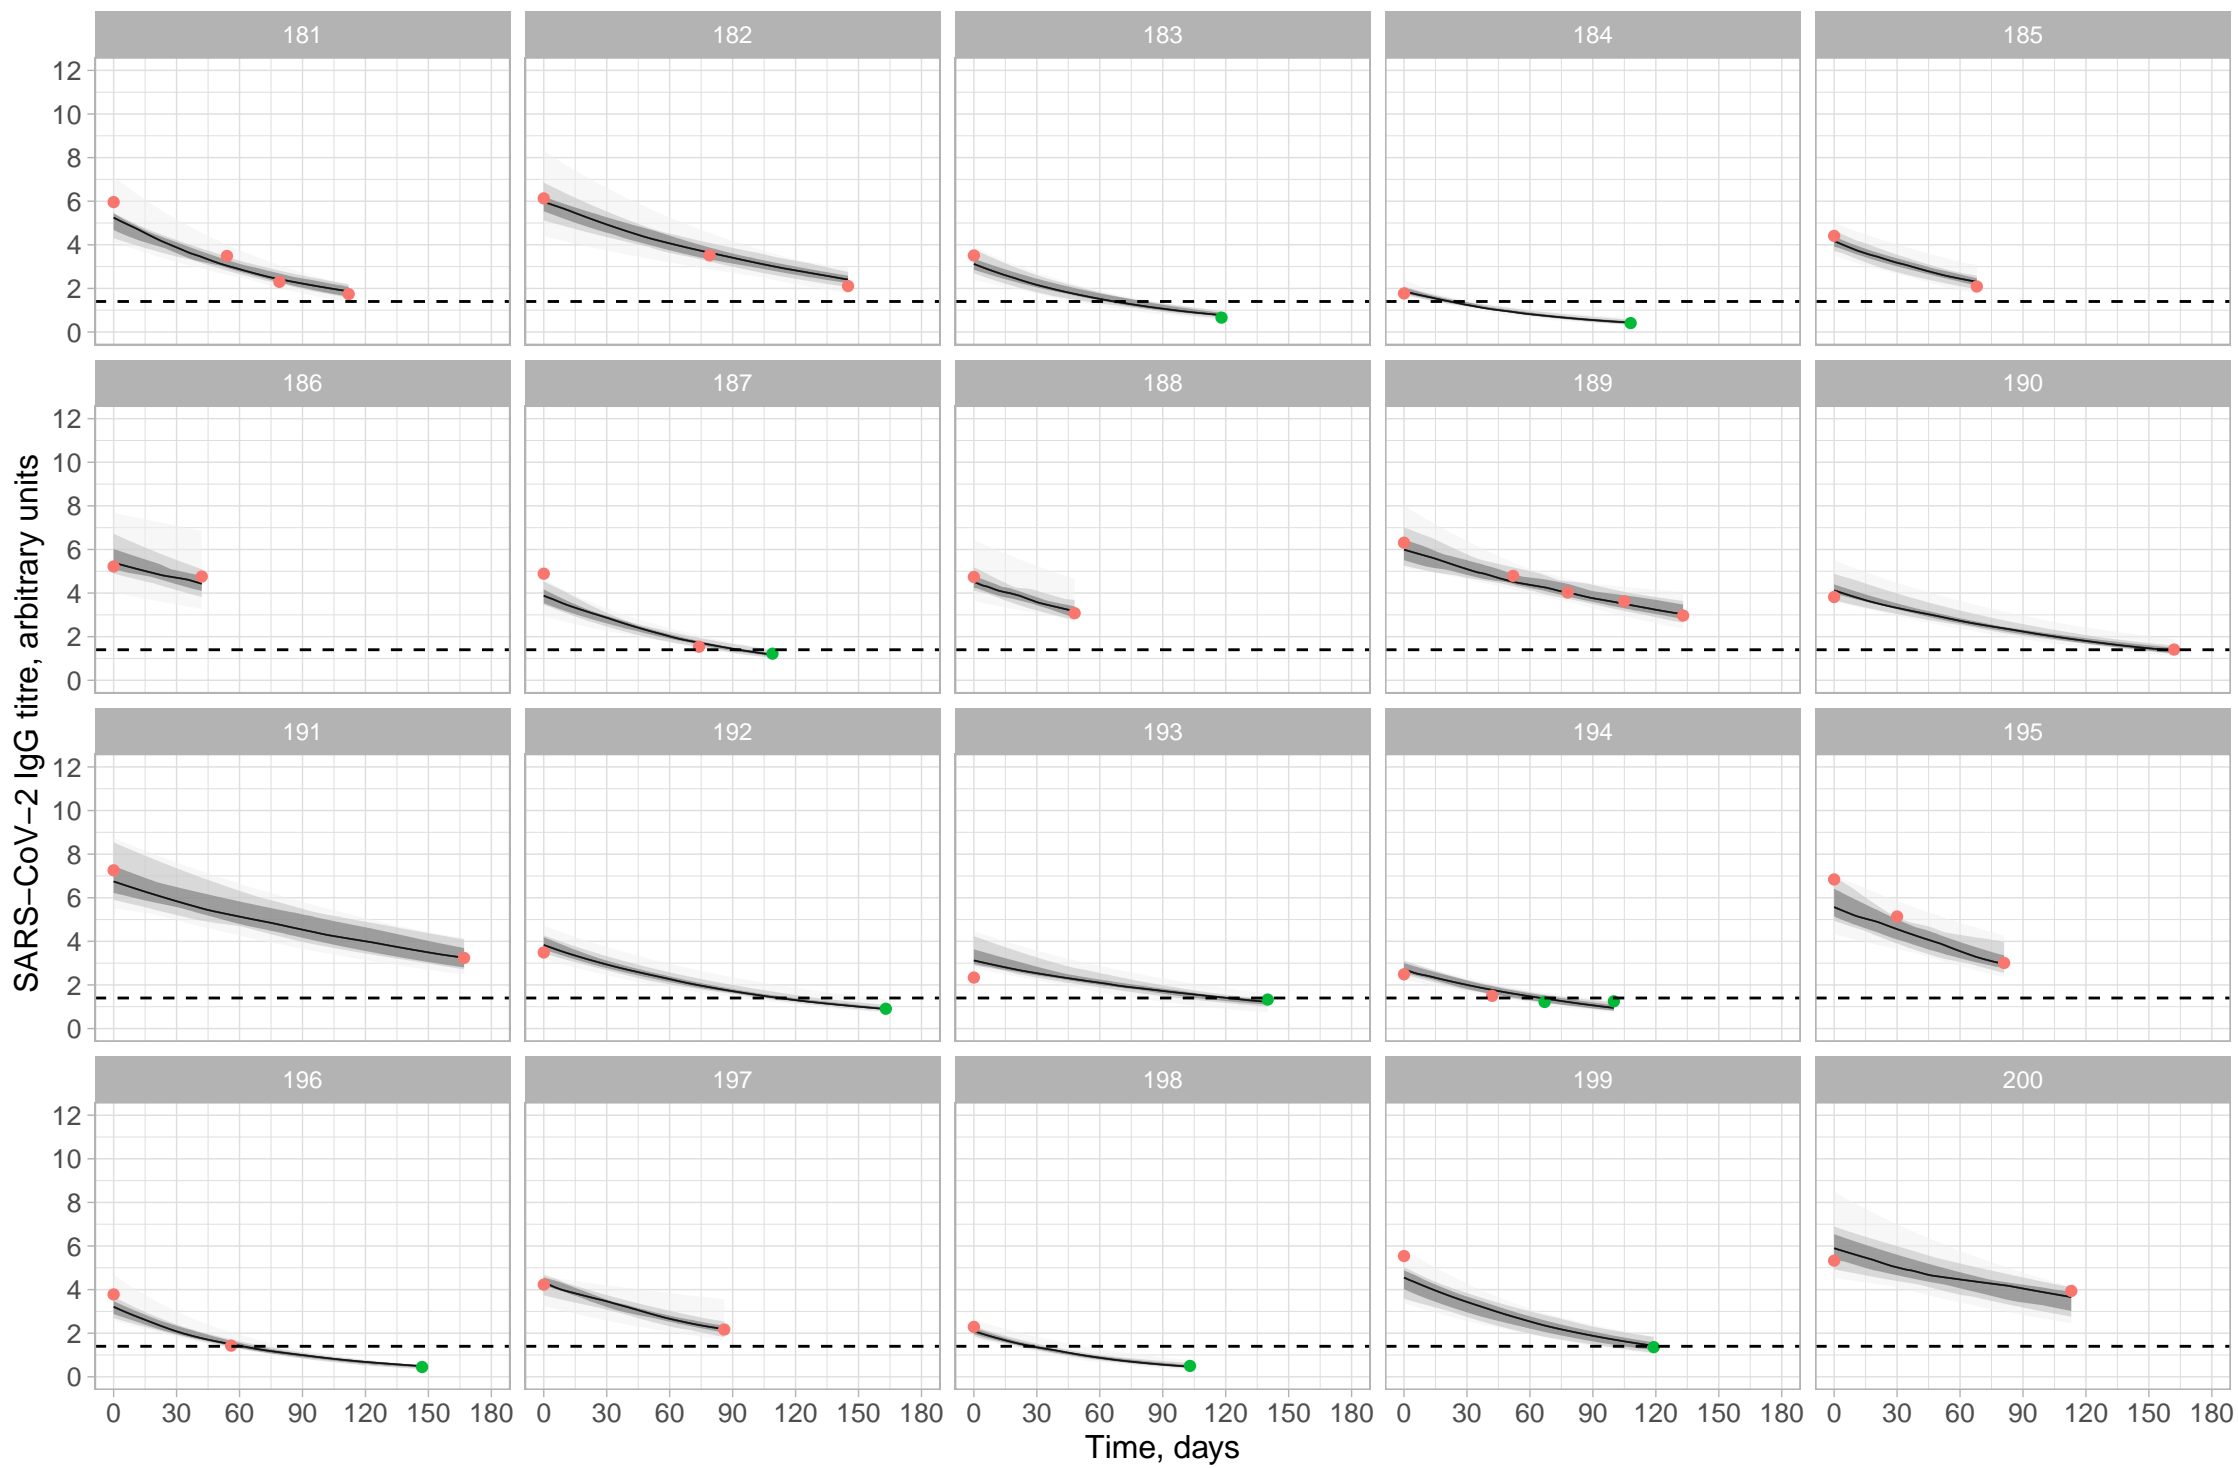

● IgG positive ● IgG negative ● Exclude (before maximum titre)

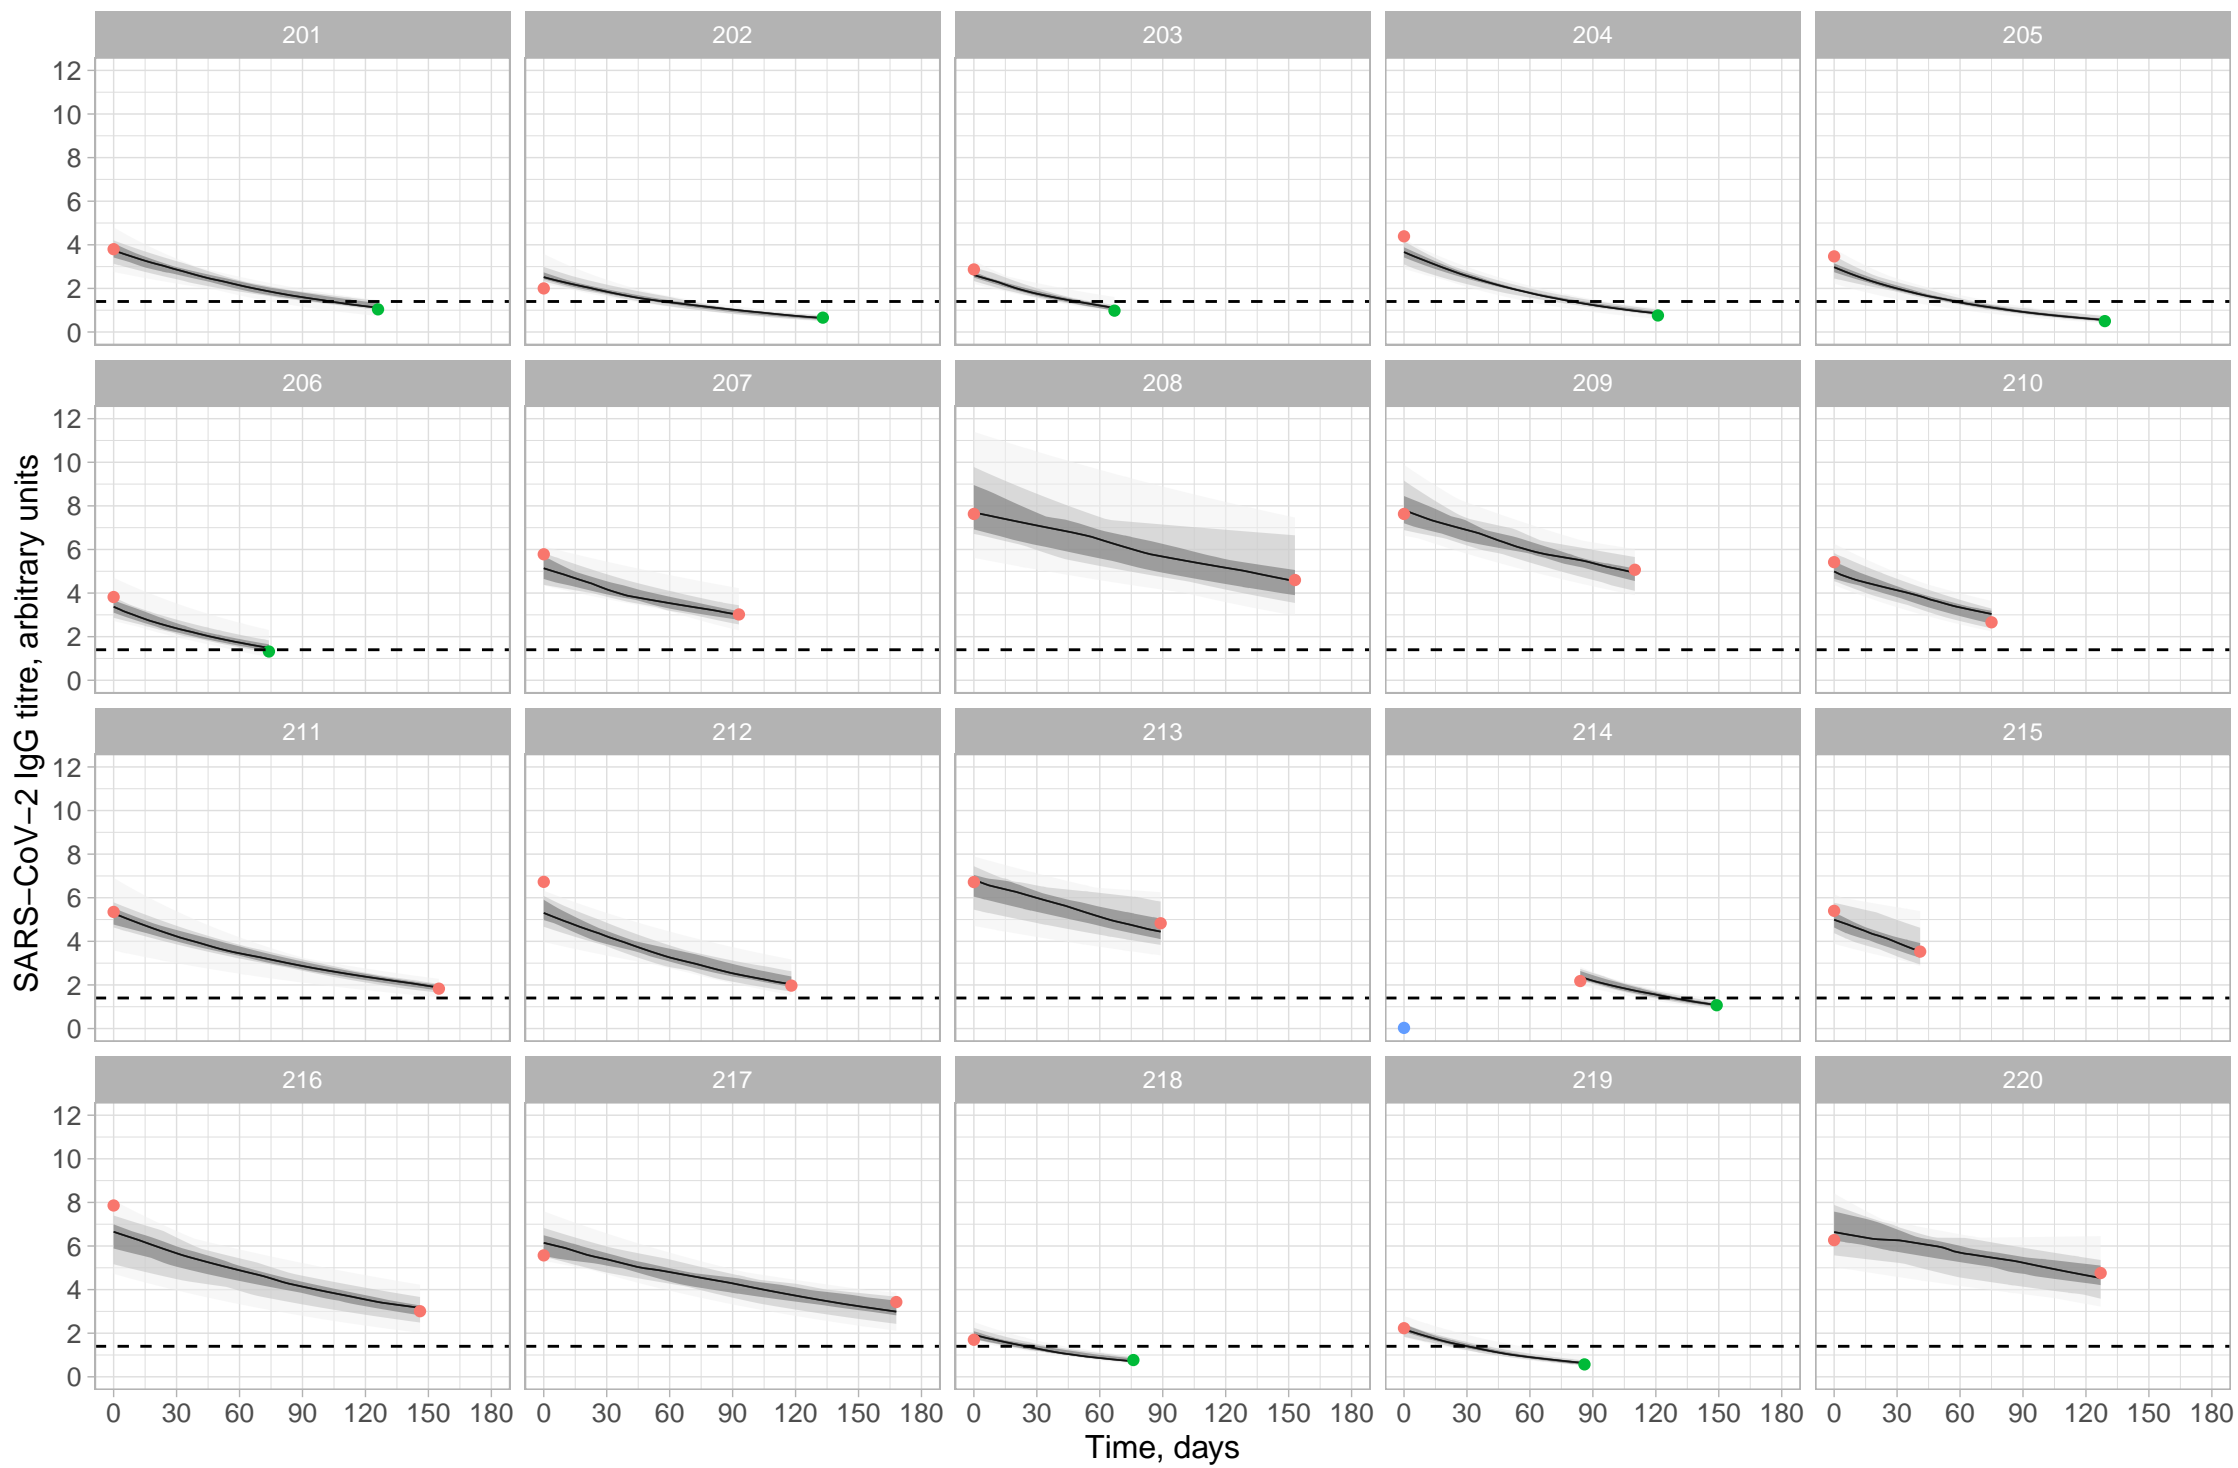

● IgG positive ● IgG negative ● Exclude (before maximum titre)

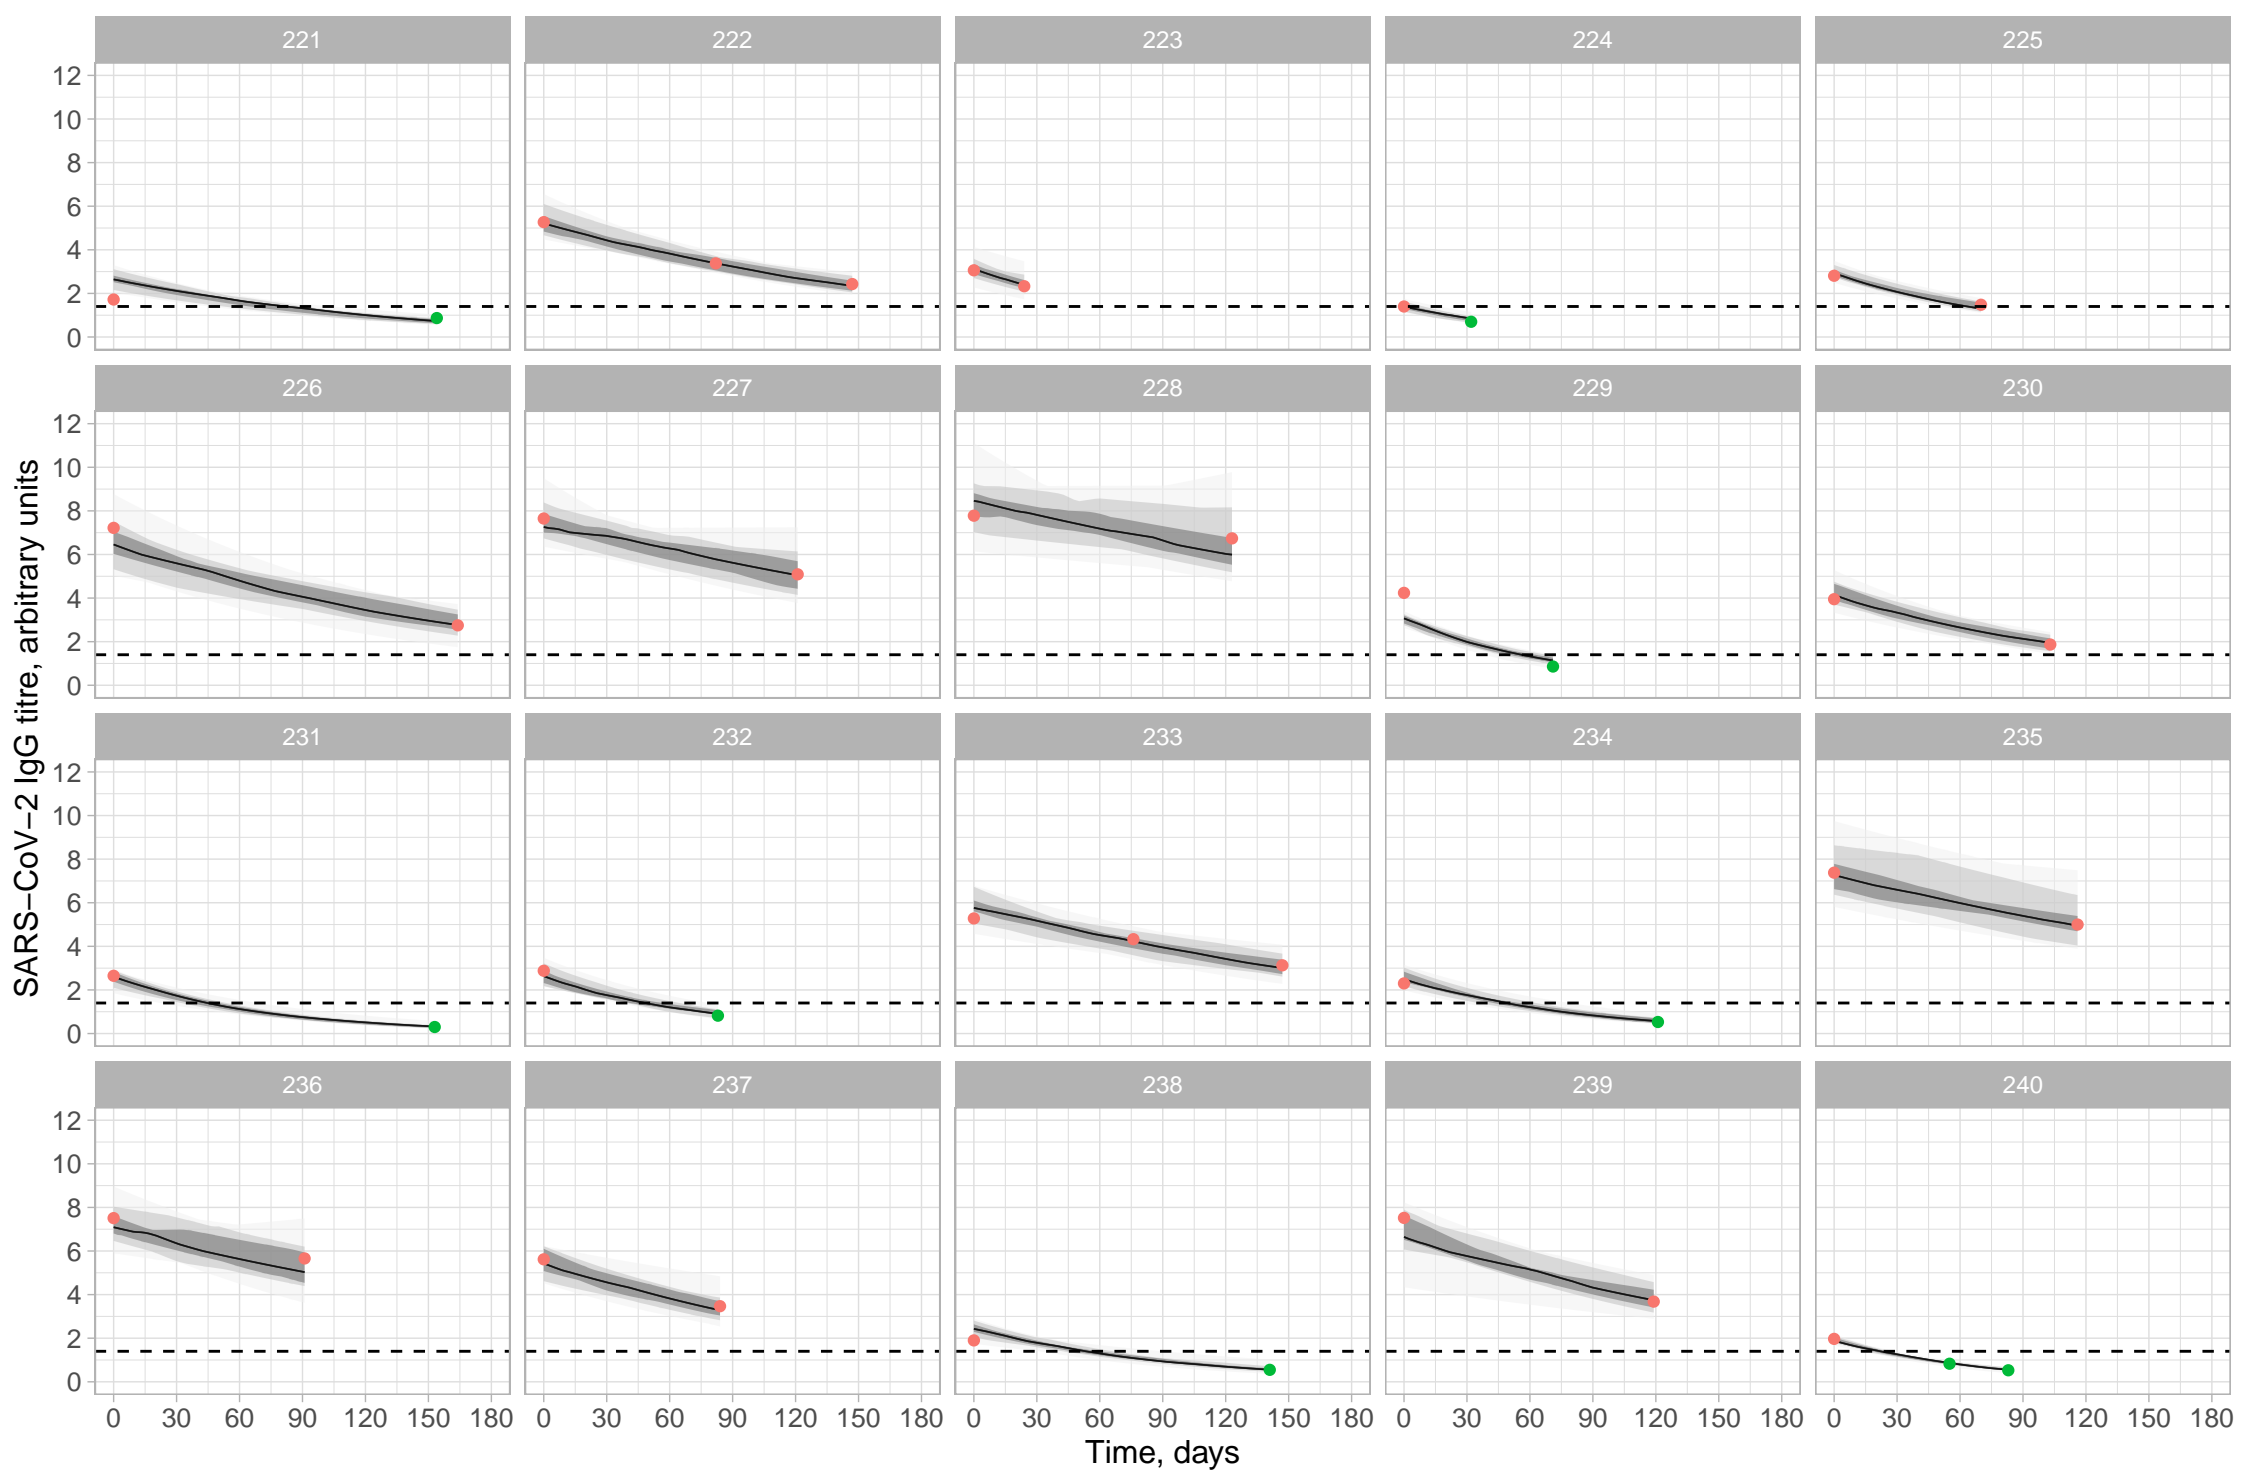

● IgG positive ● IgG negative ● Exclude (before maximum titre)

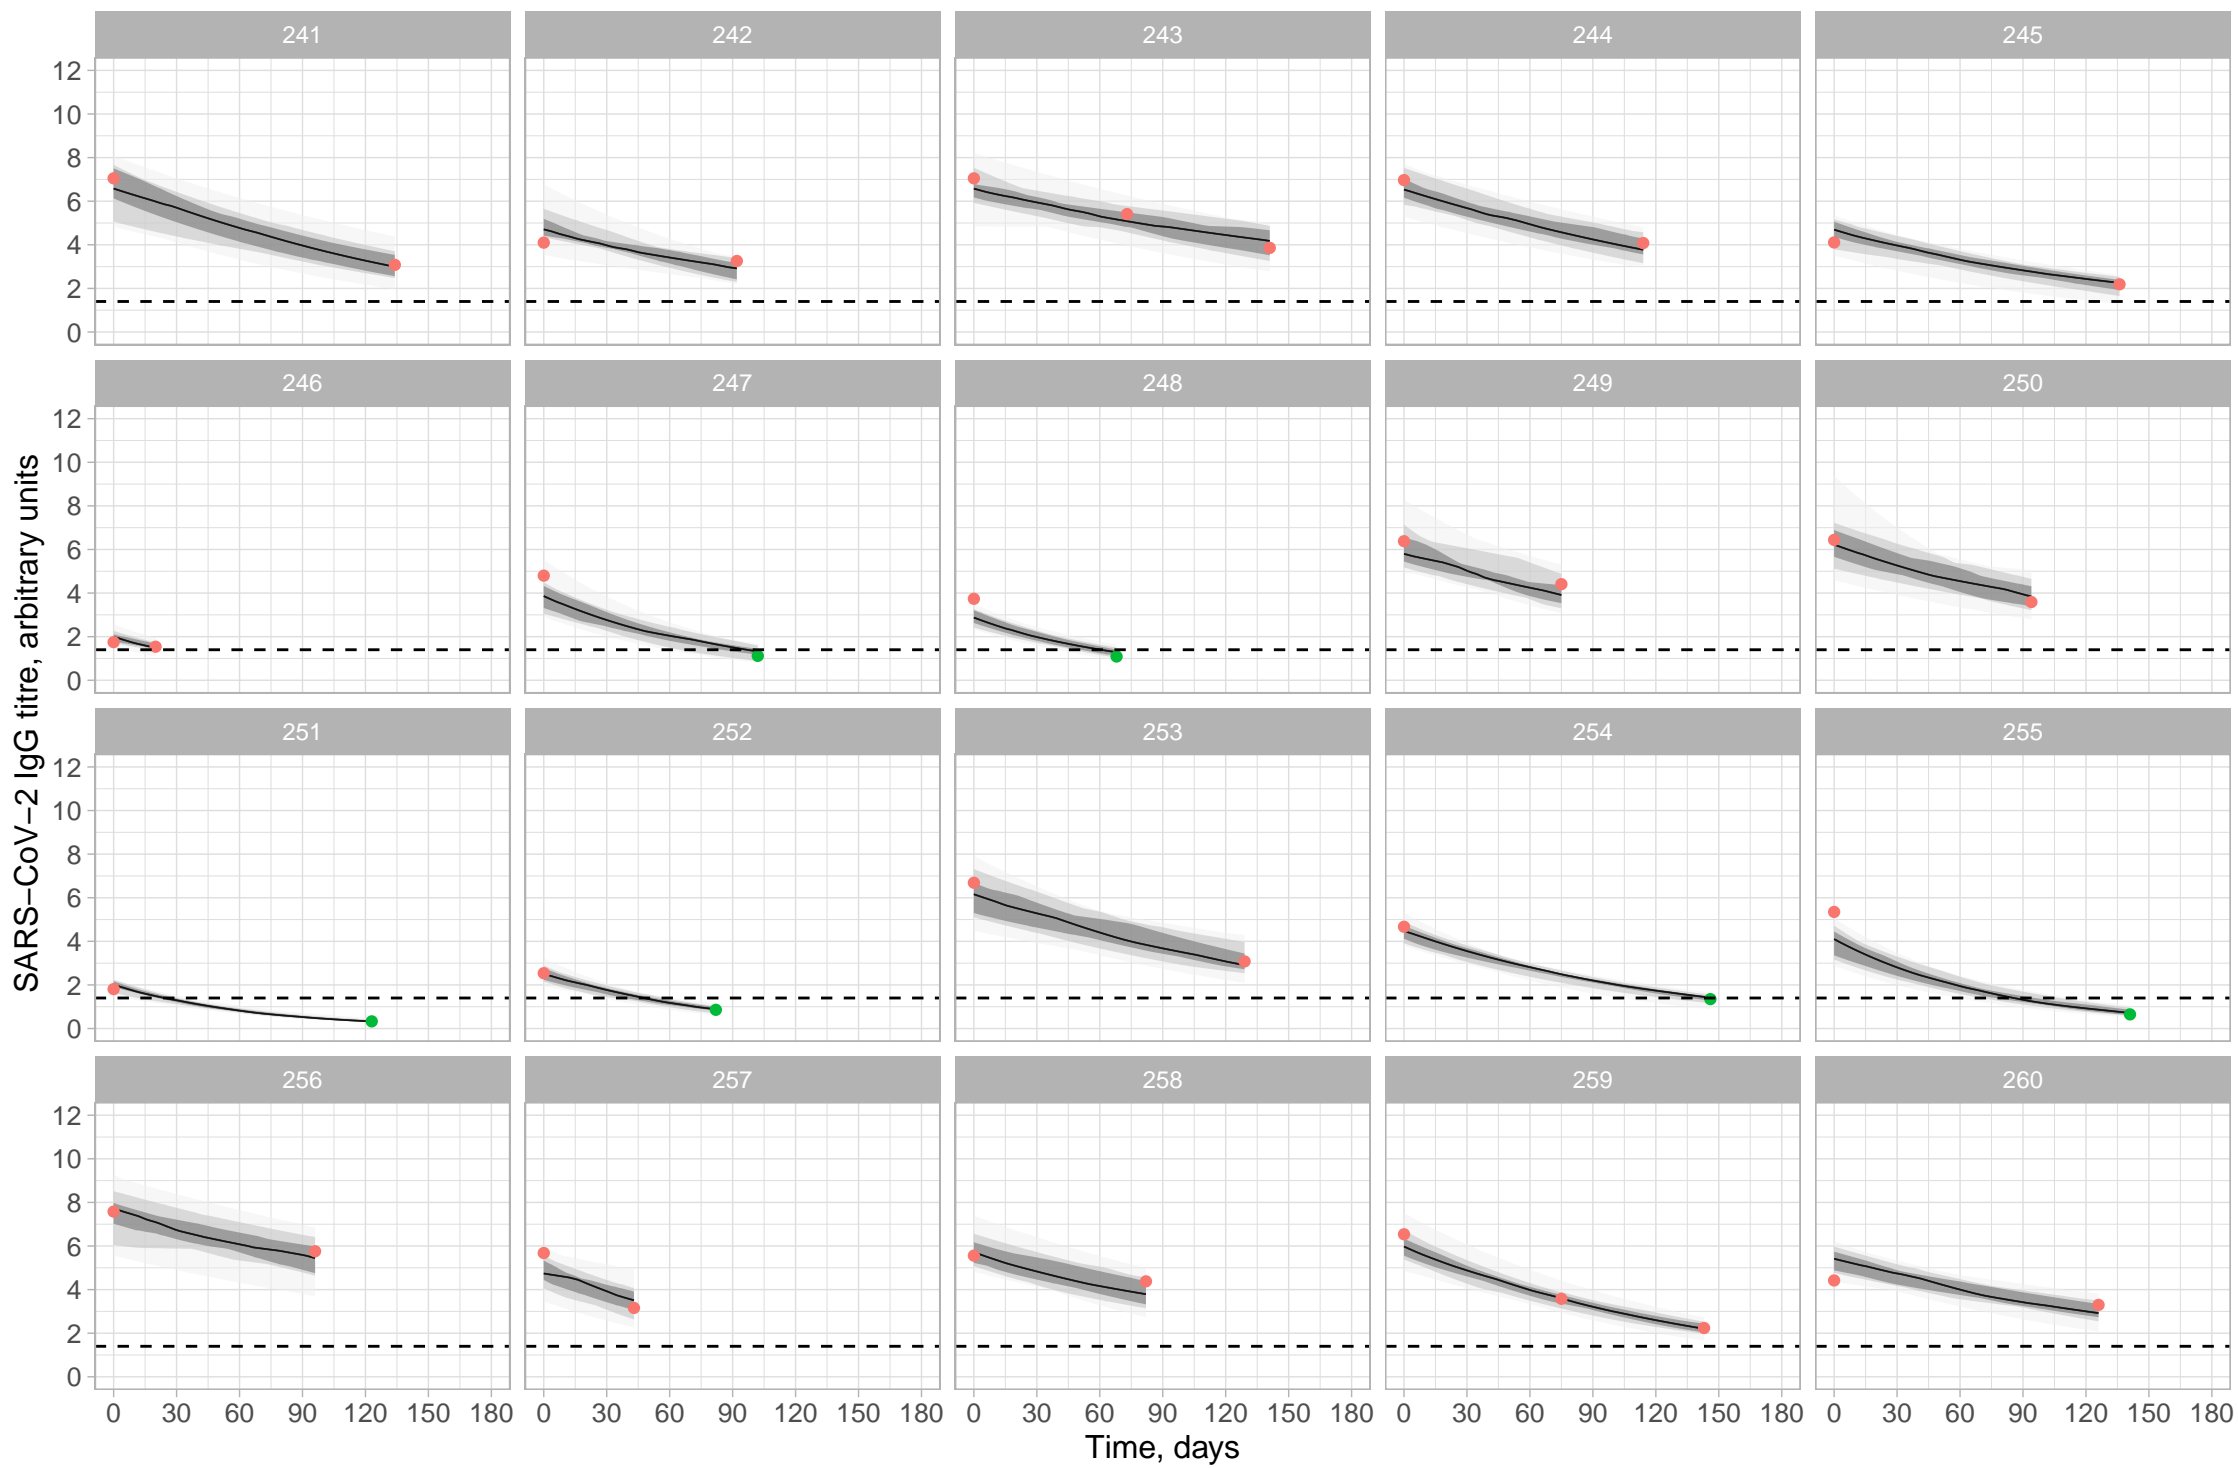

● IgG positive ● IgG negative ● Exclude (before maximum titre)

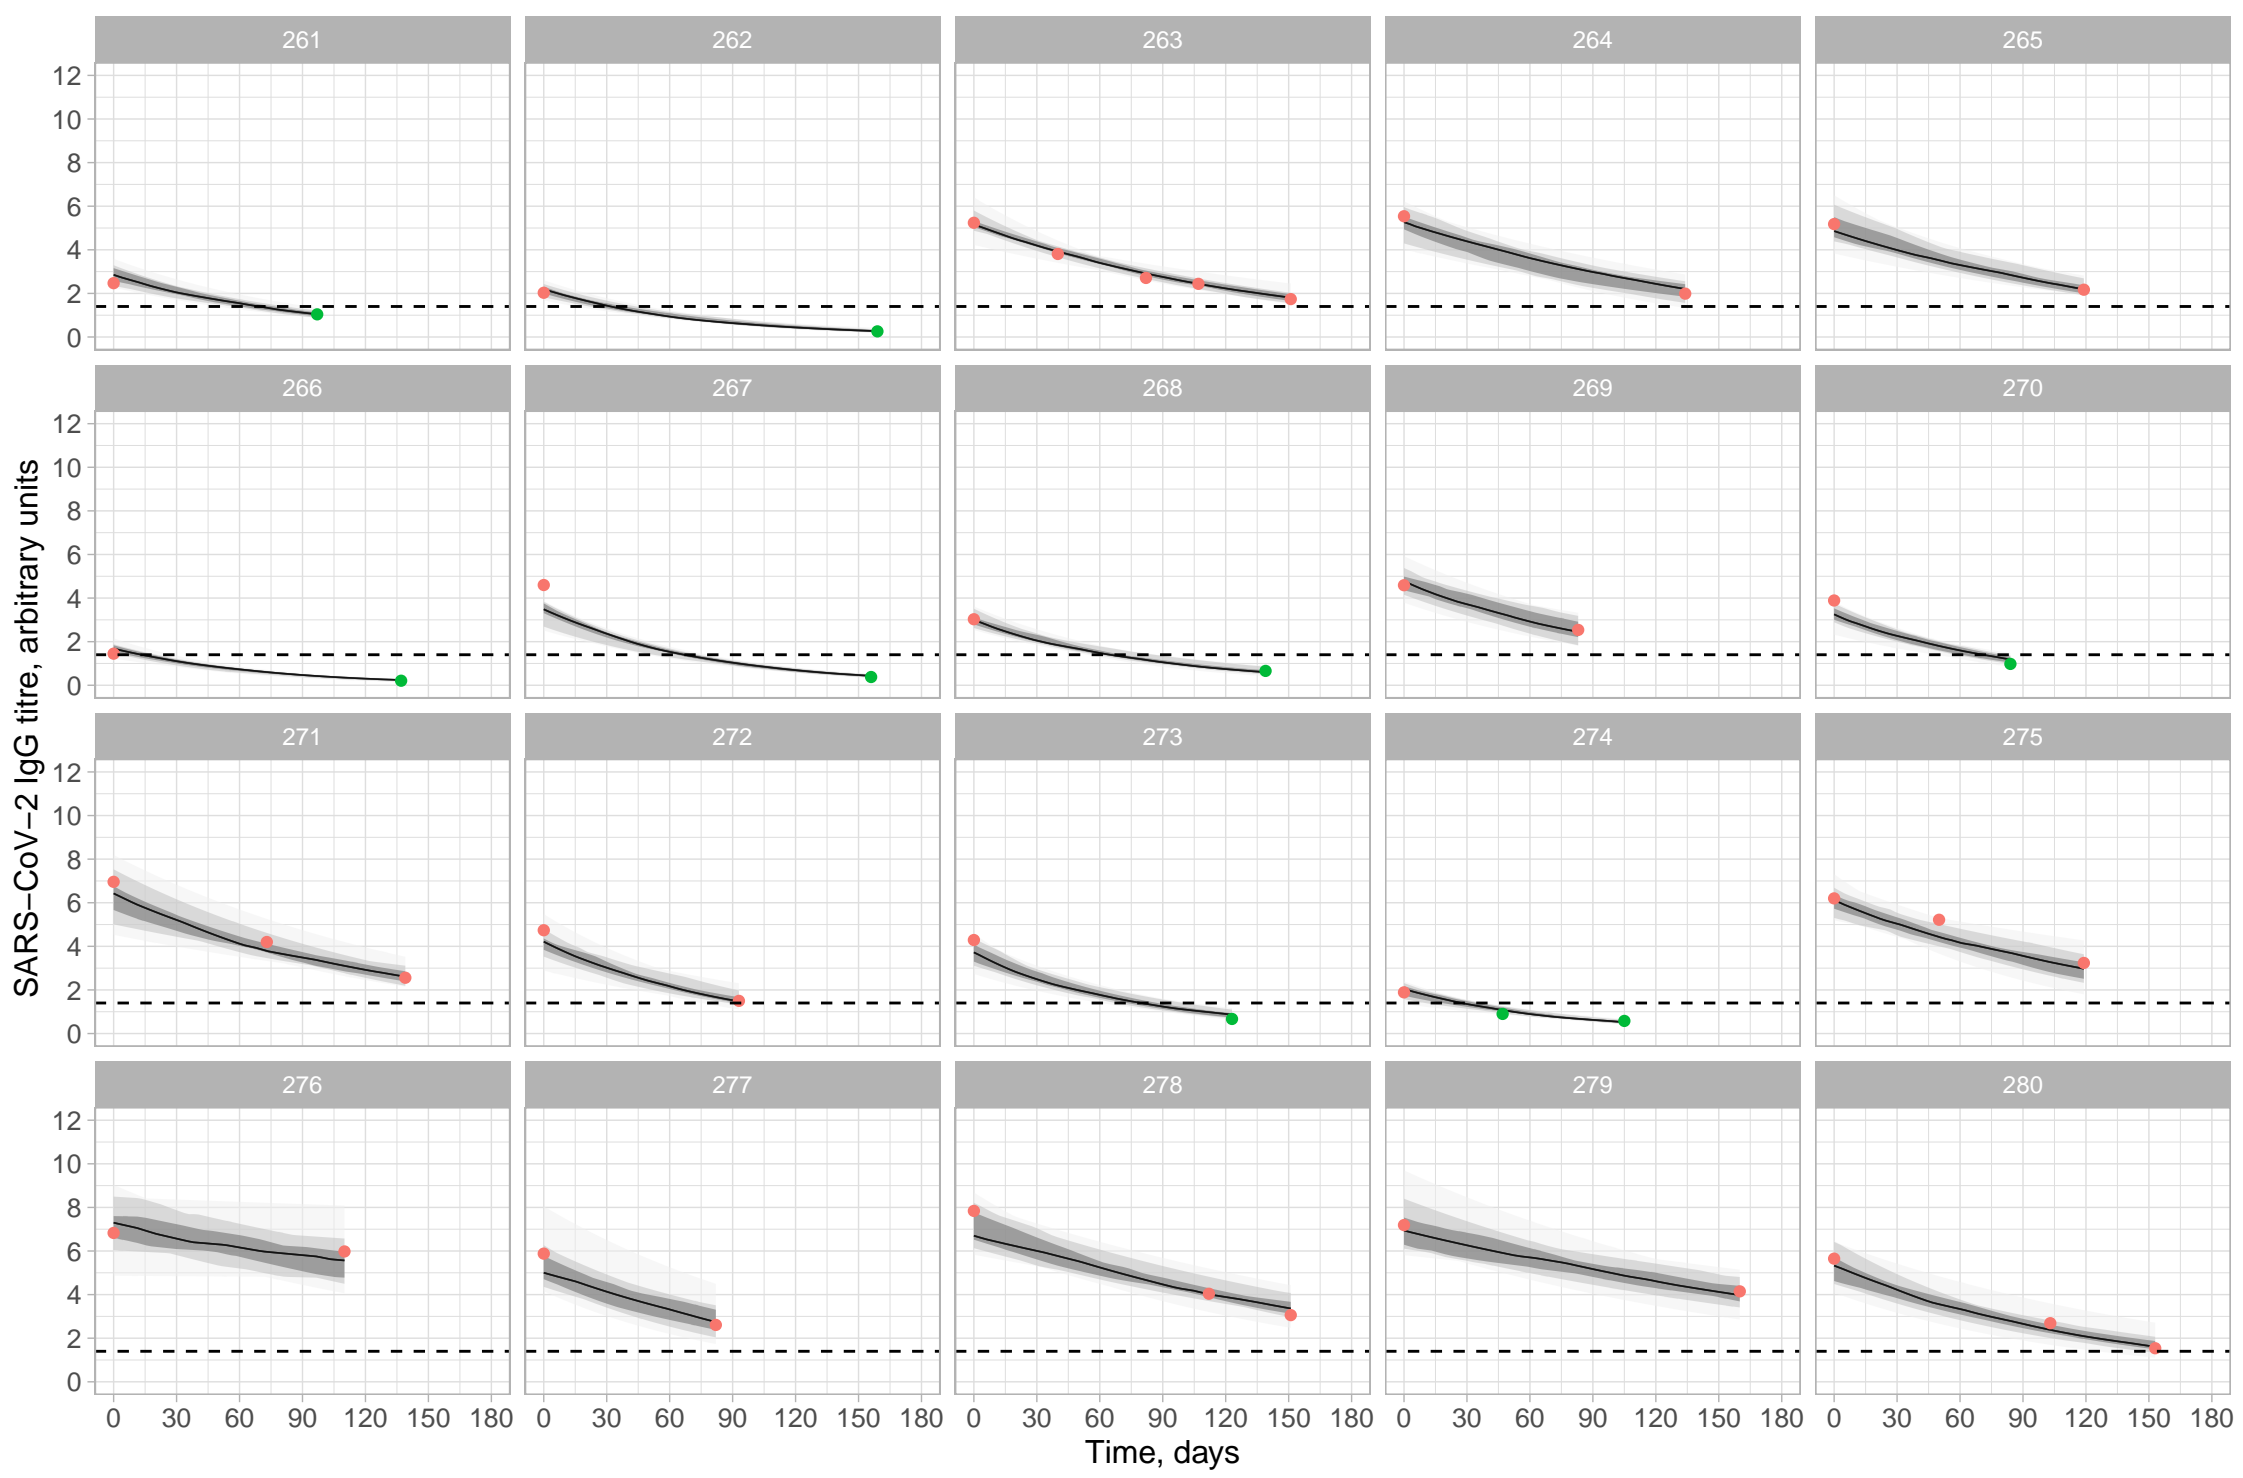

● IgG positive ● IgG negative ● Exclude (before maximum titre)

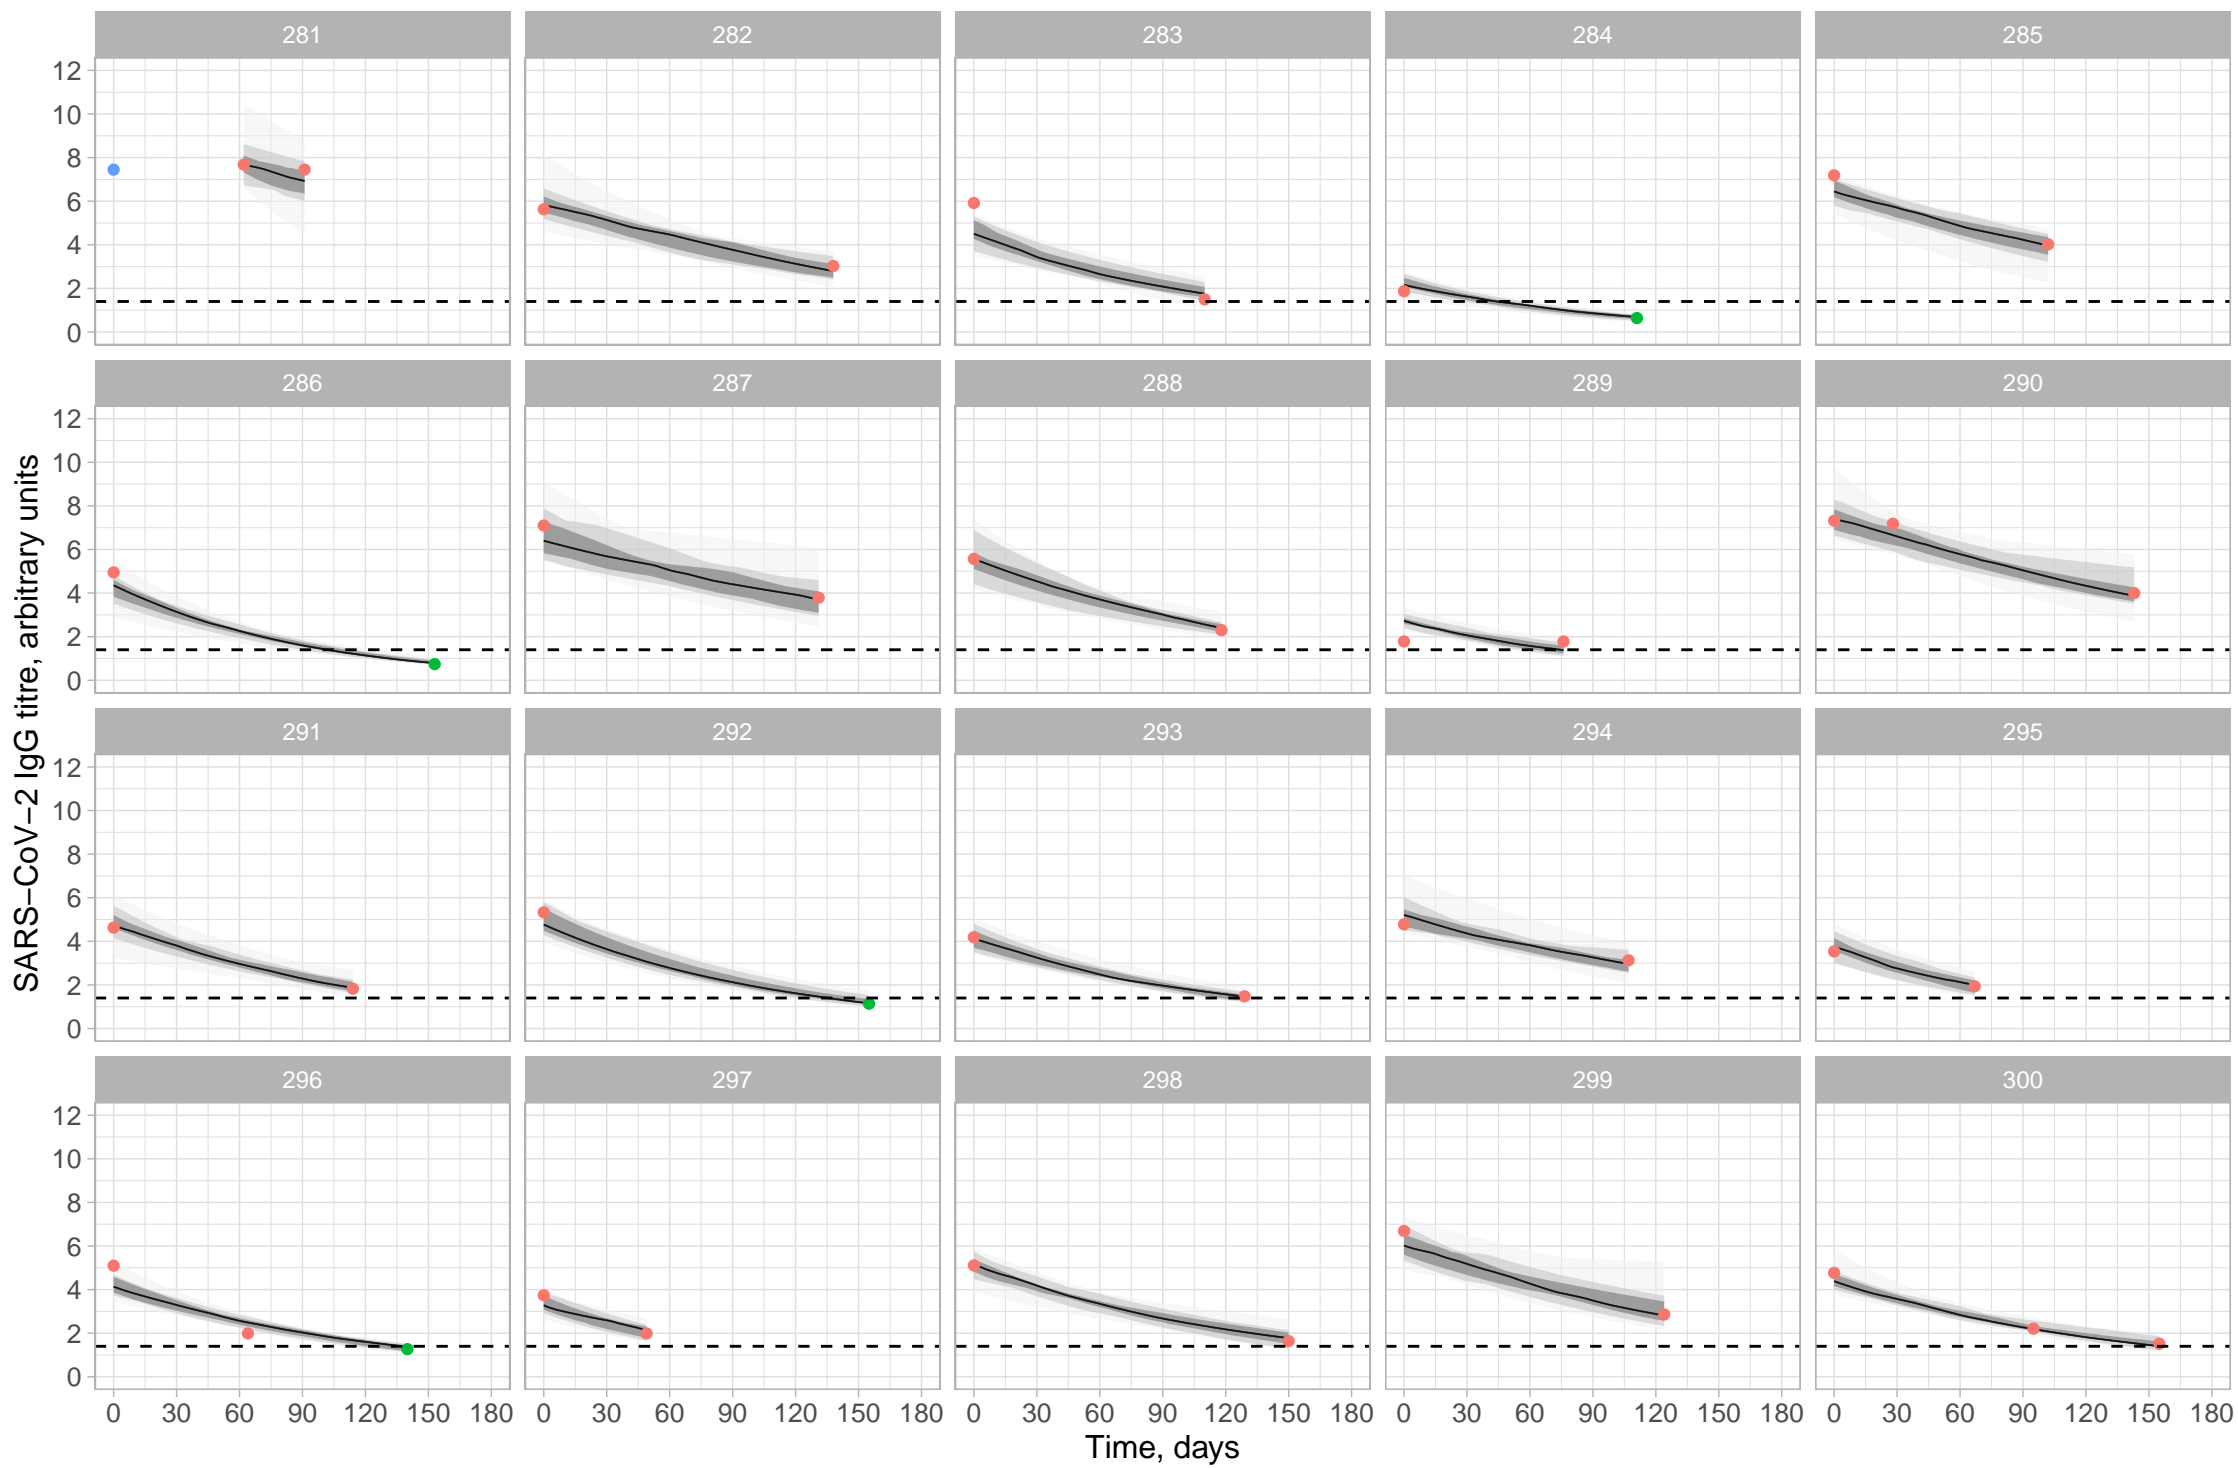

● IgG positive ● IgG negative ● Exclude (before maximum titre)

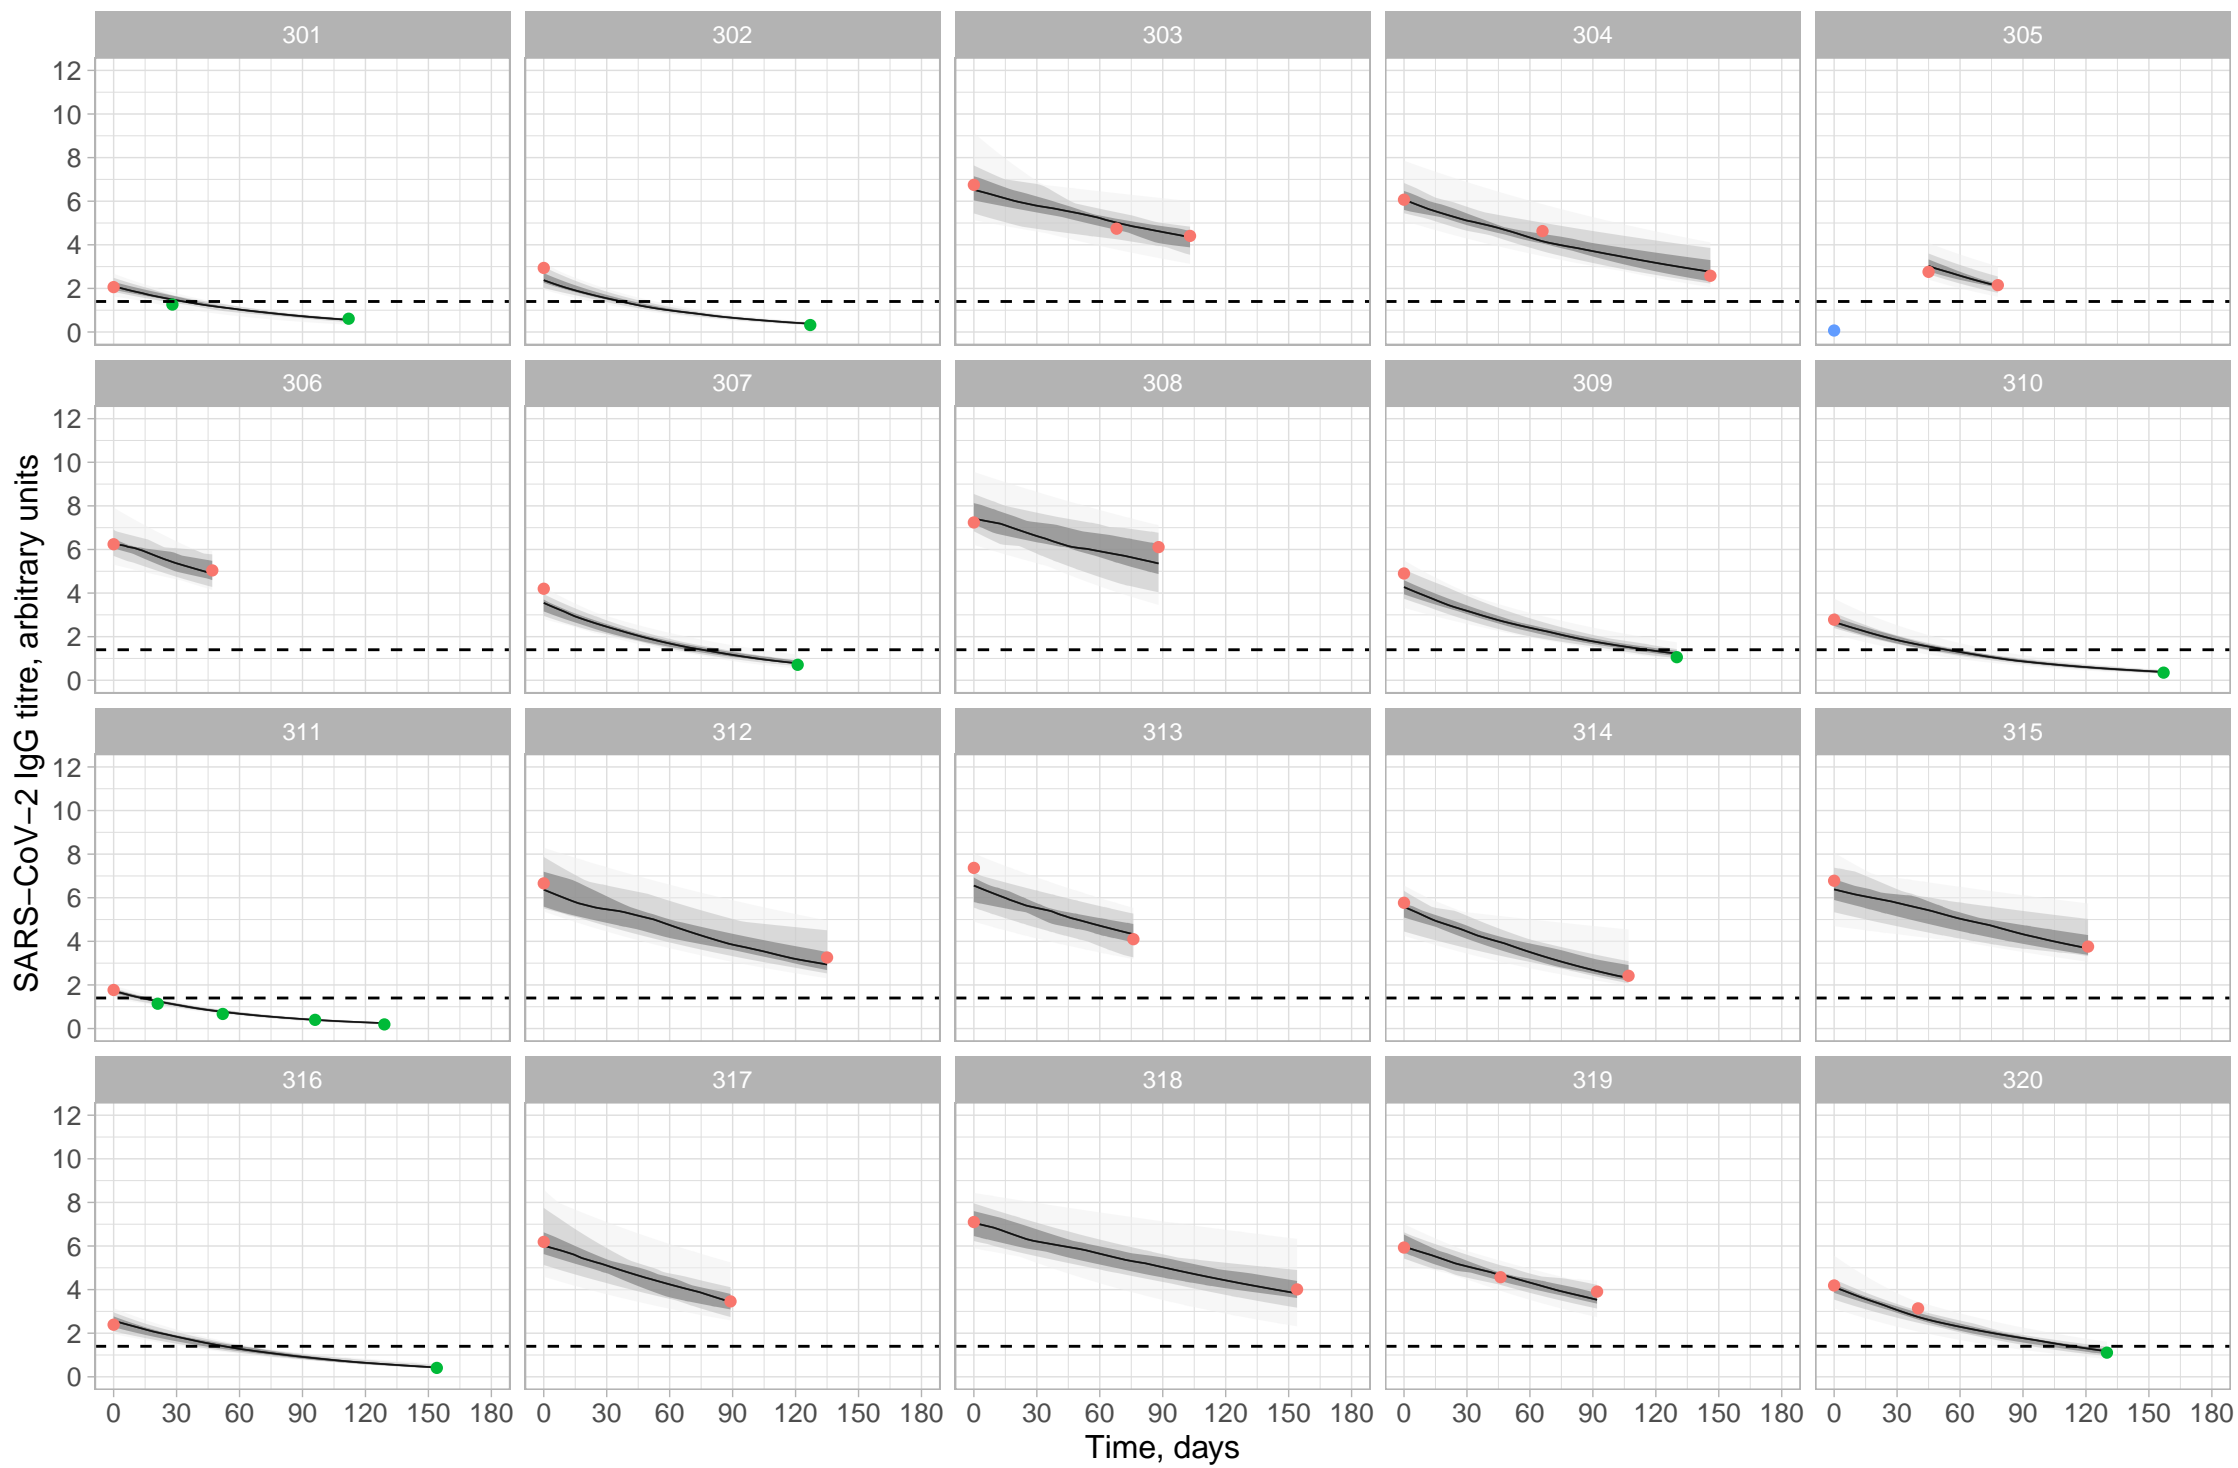



● IgG positive ● IgG negative ● Exclude (before maximum titre)

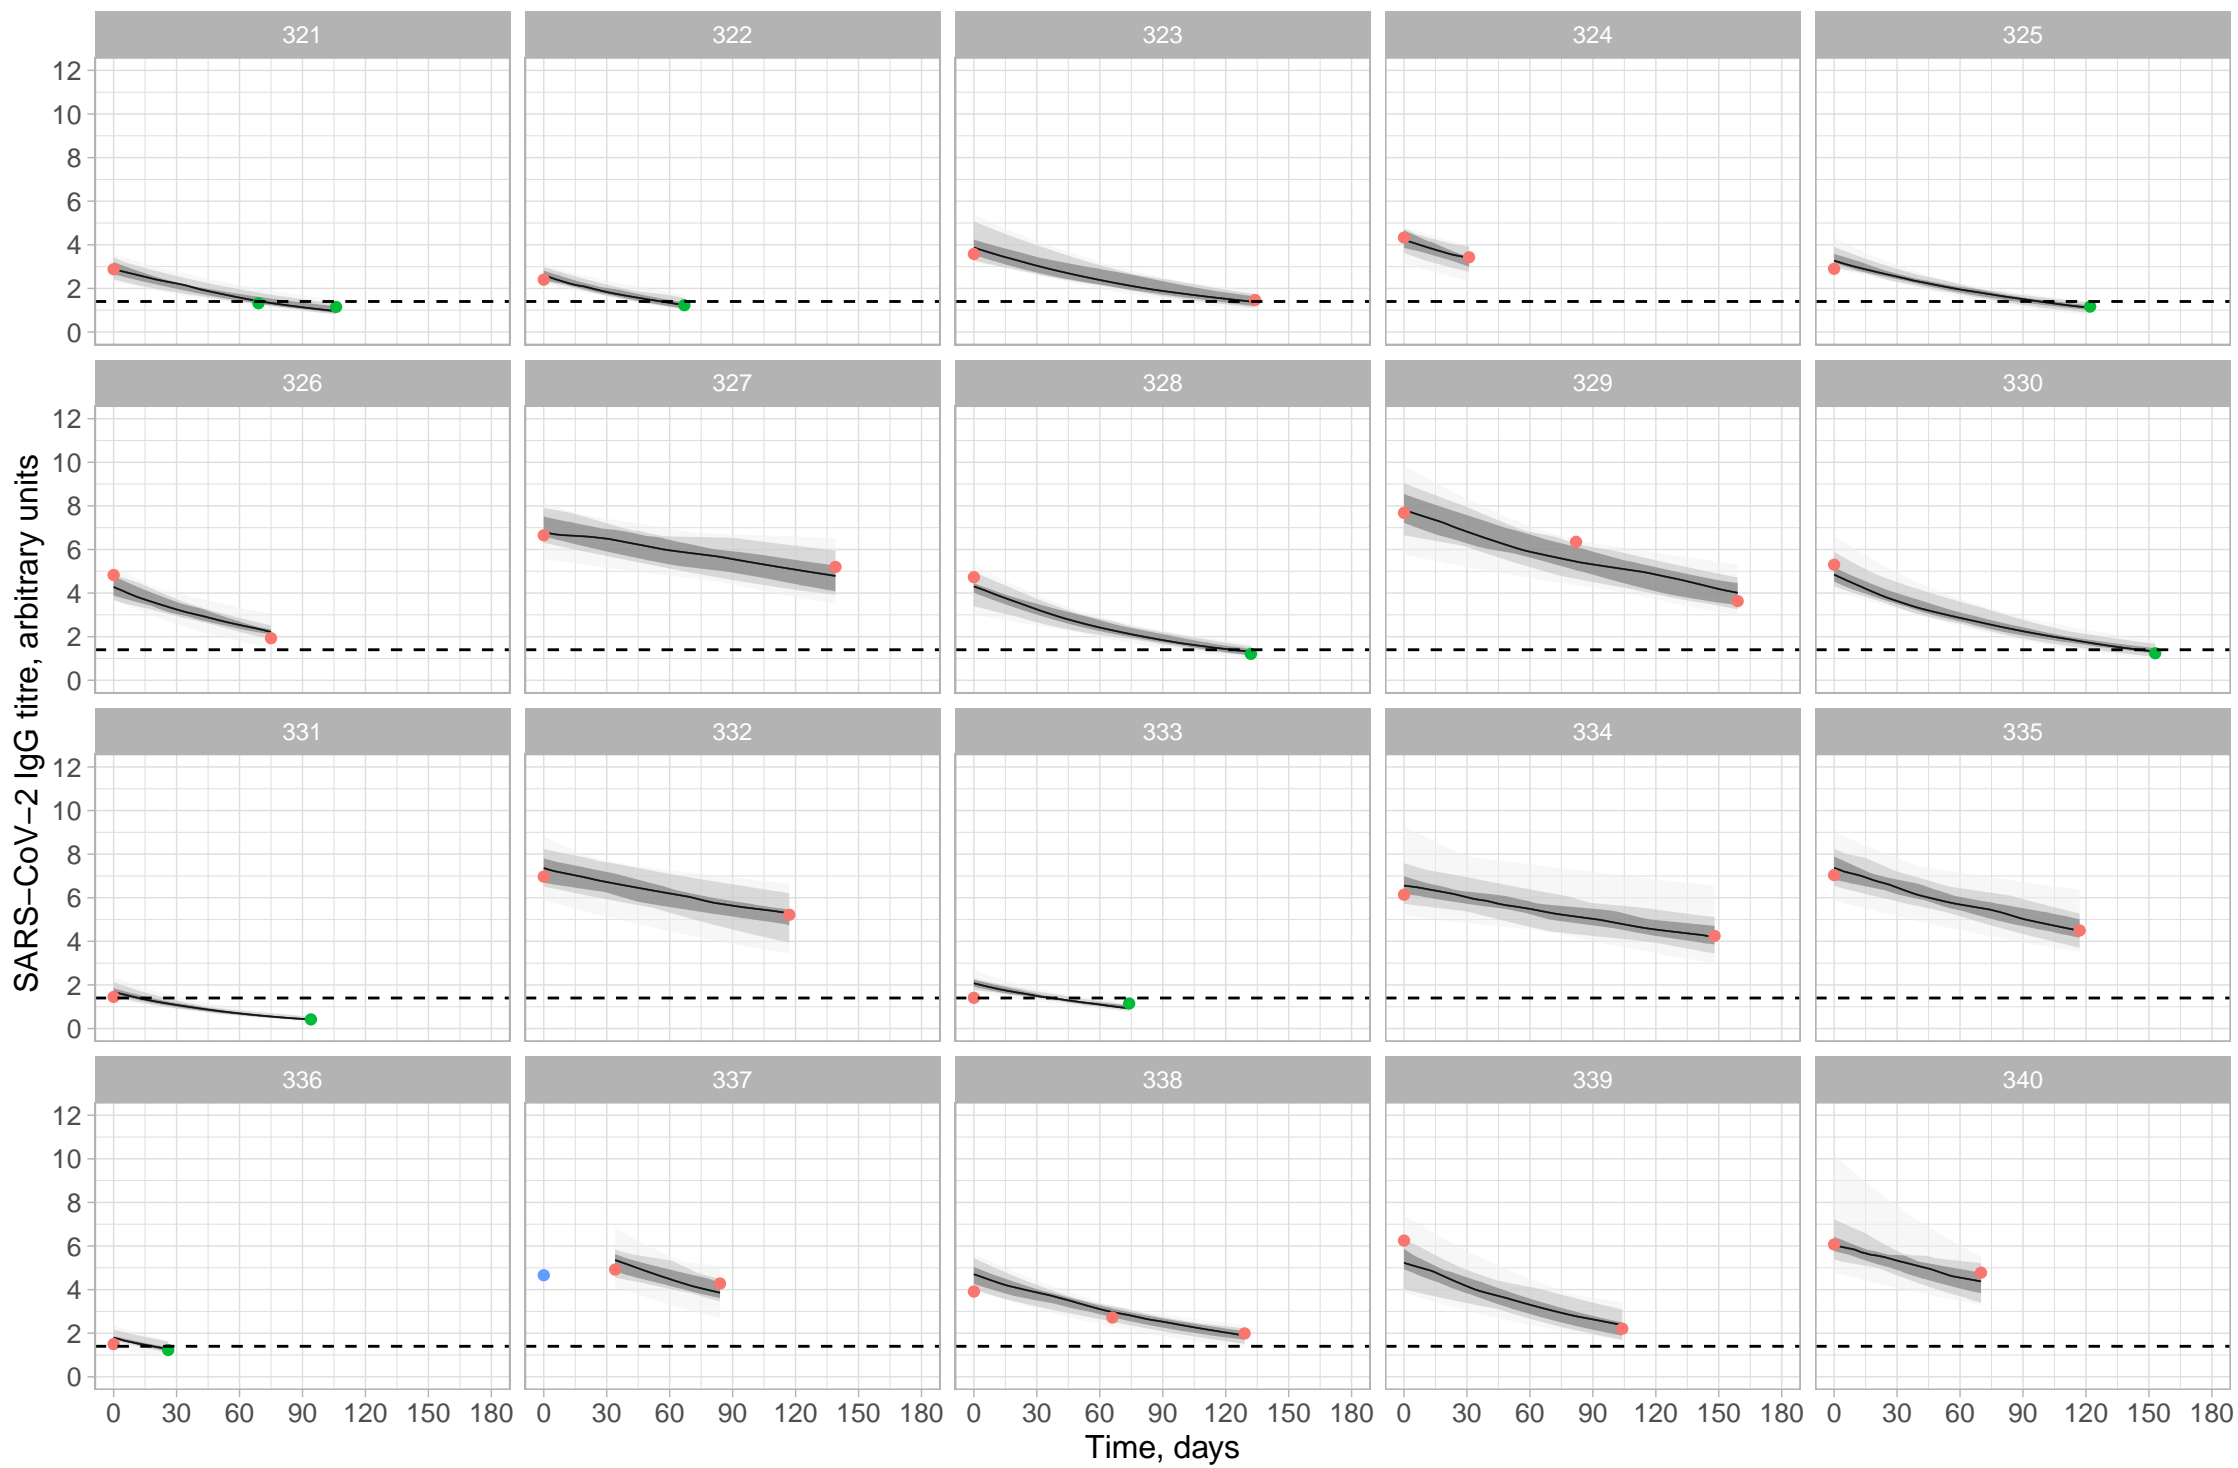

● IgG positive ● IgG negative ● Exclude (before maximum titre)

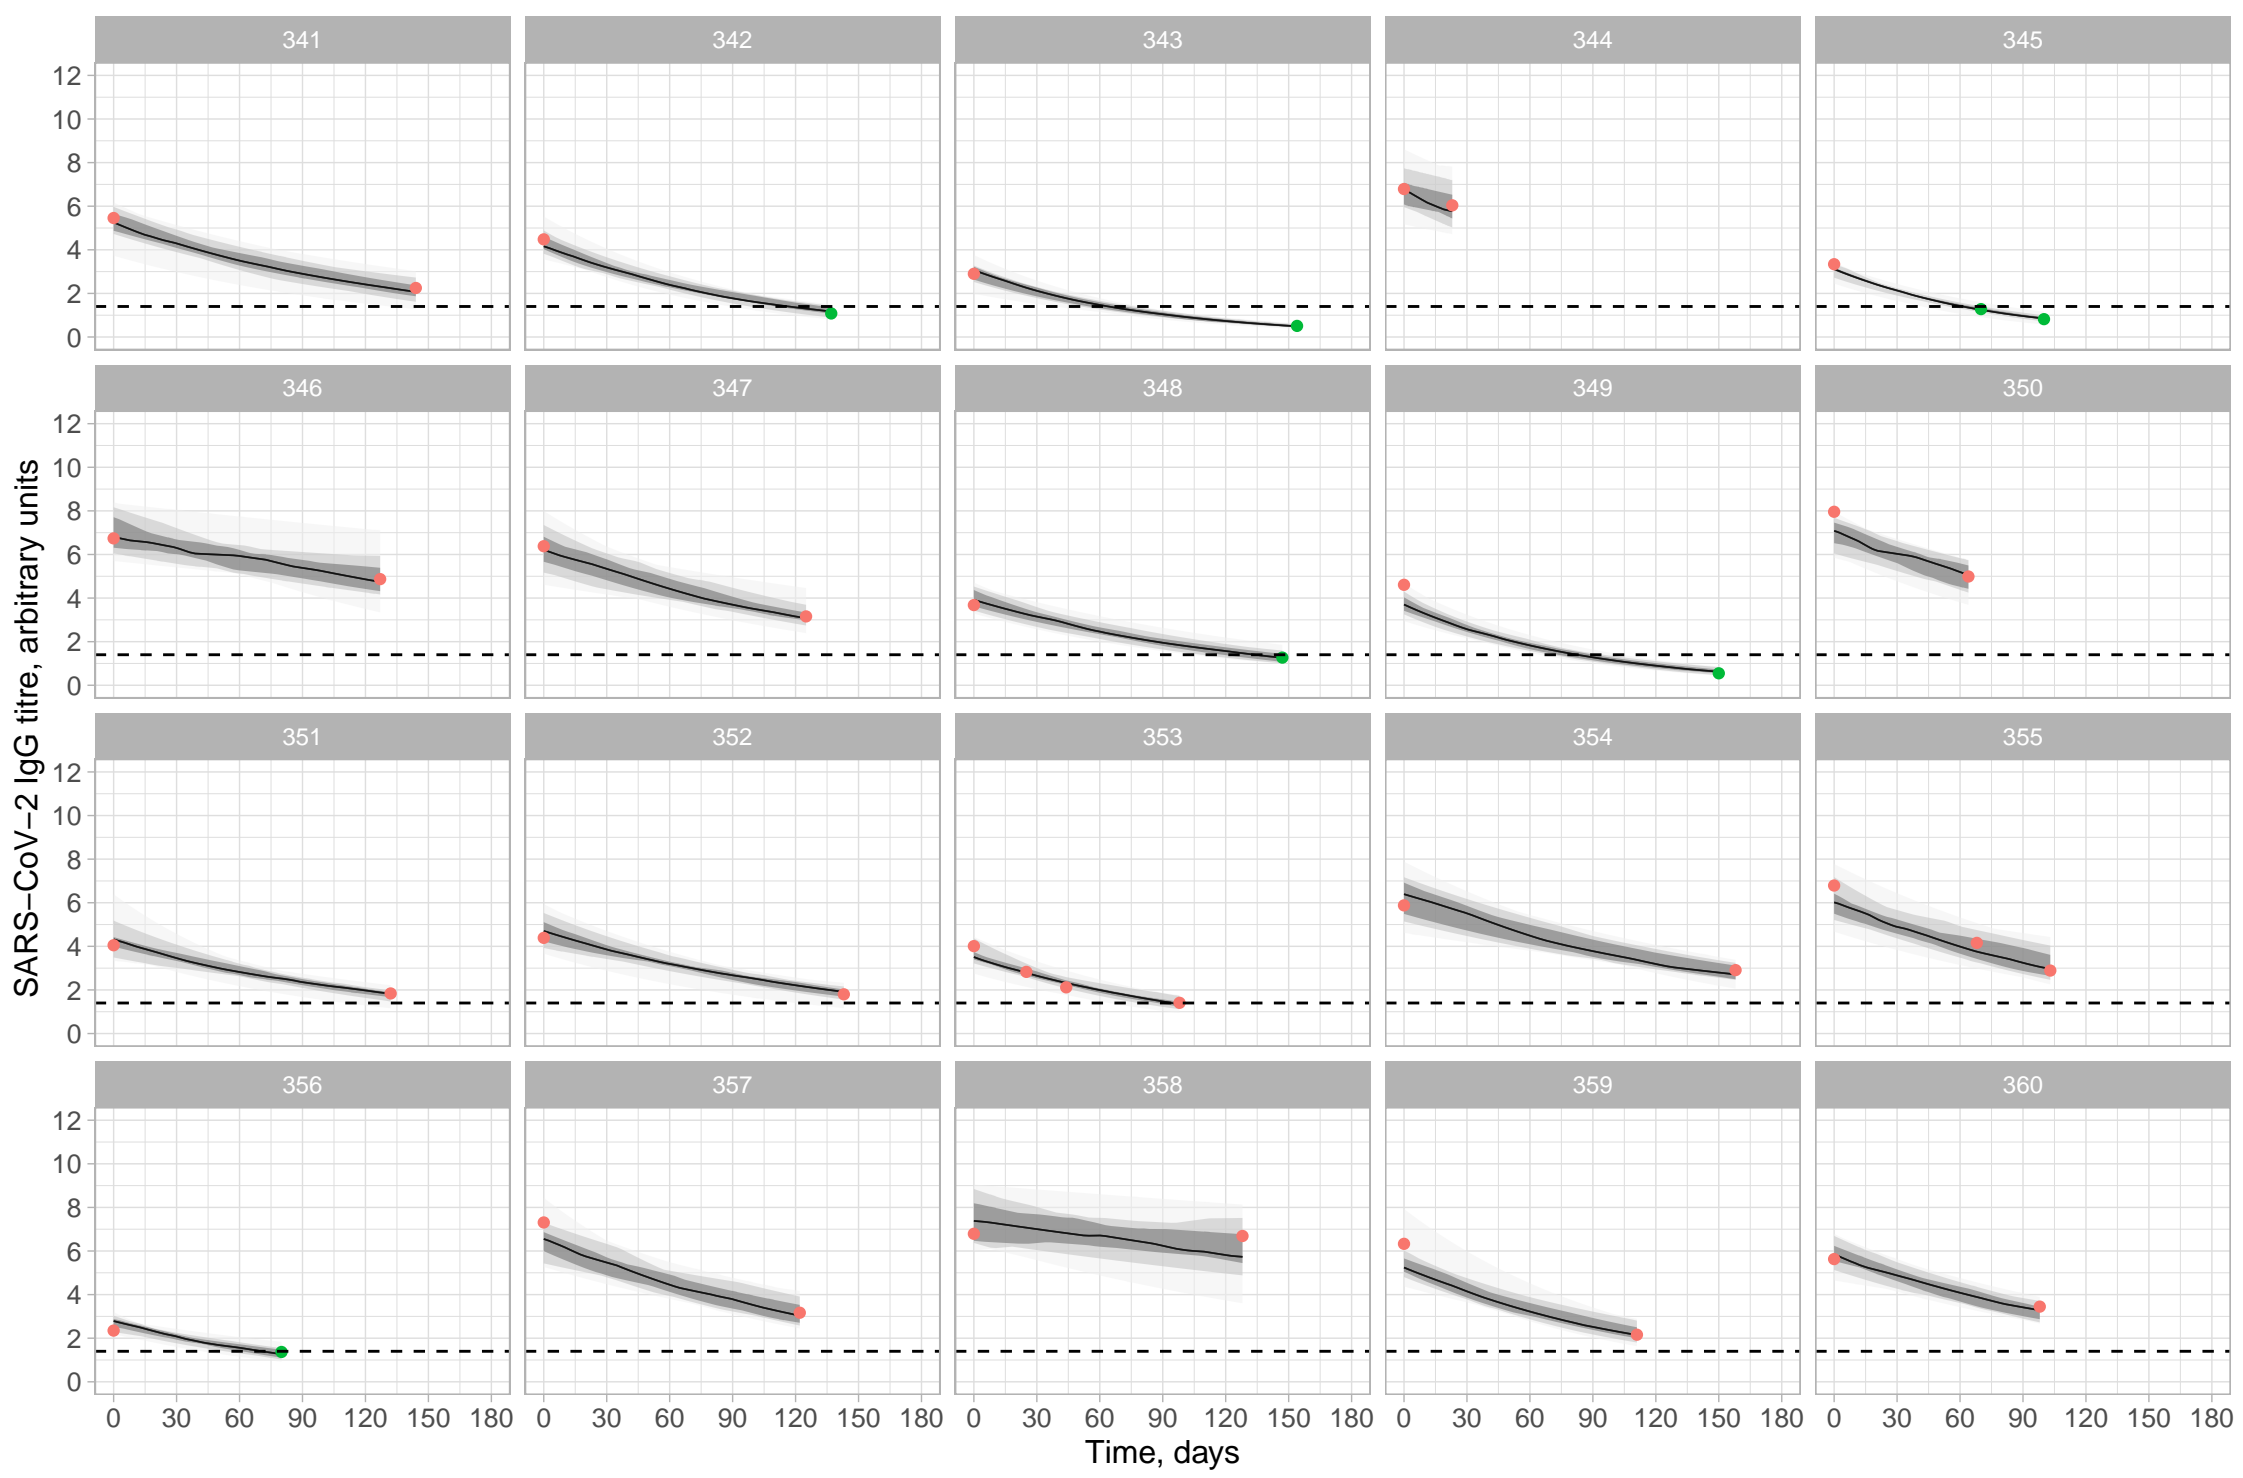

● IgG positive ● IgG negative ● Exclude (before maximum titre)

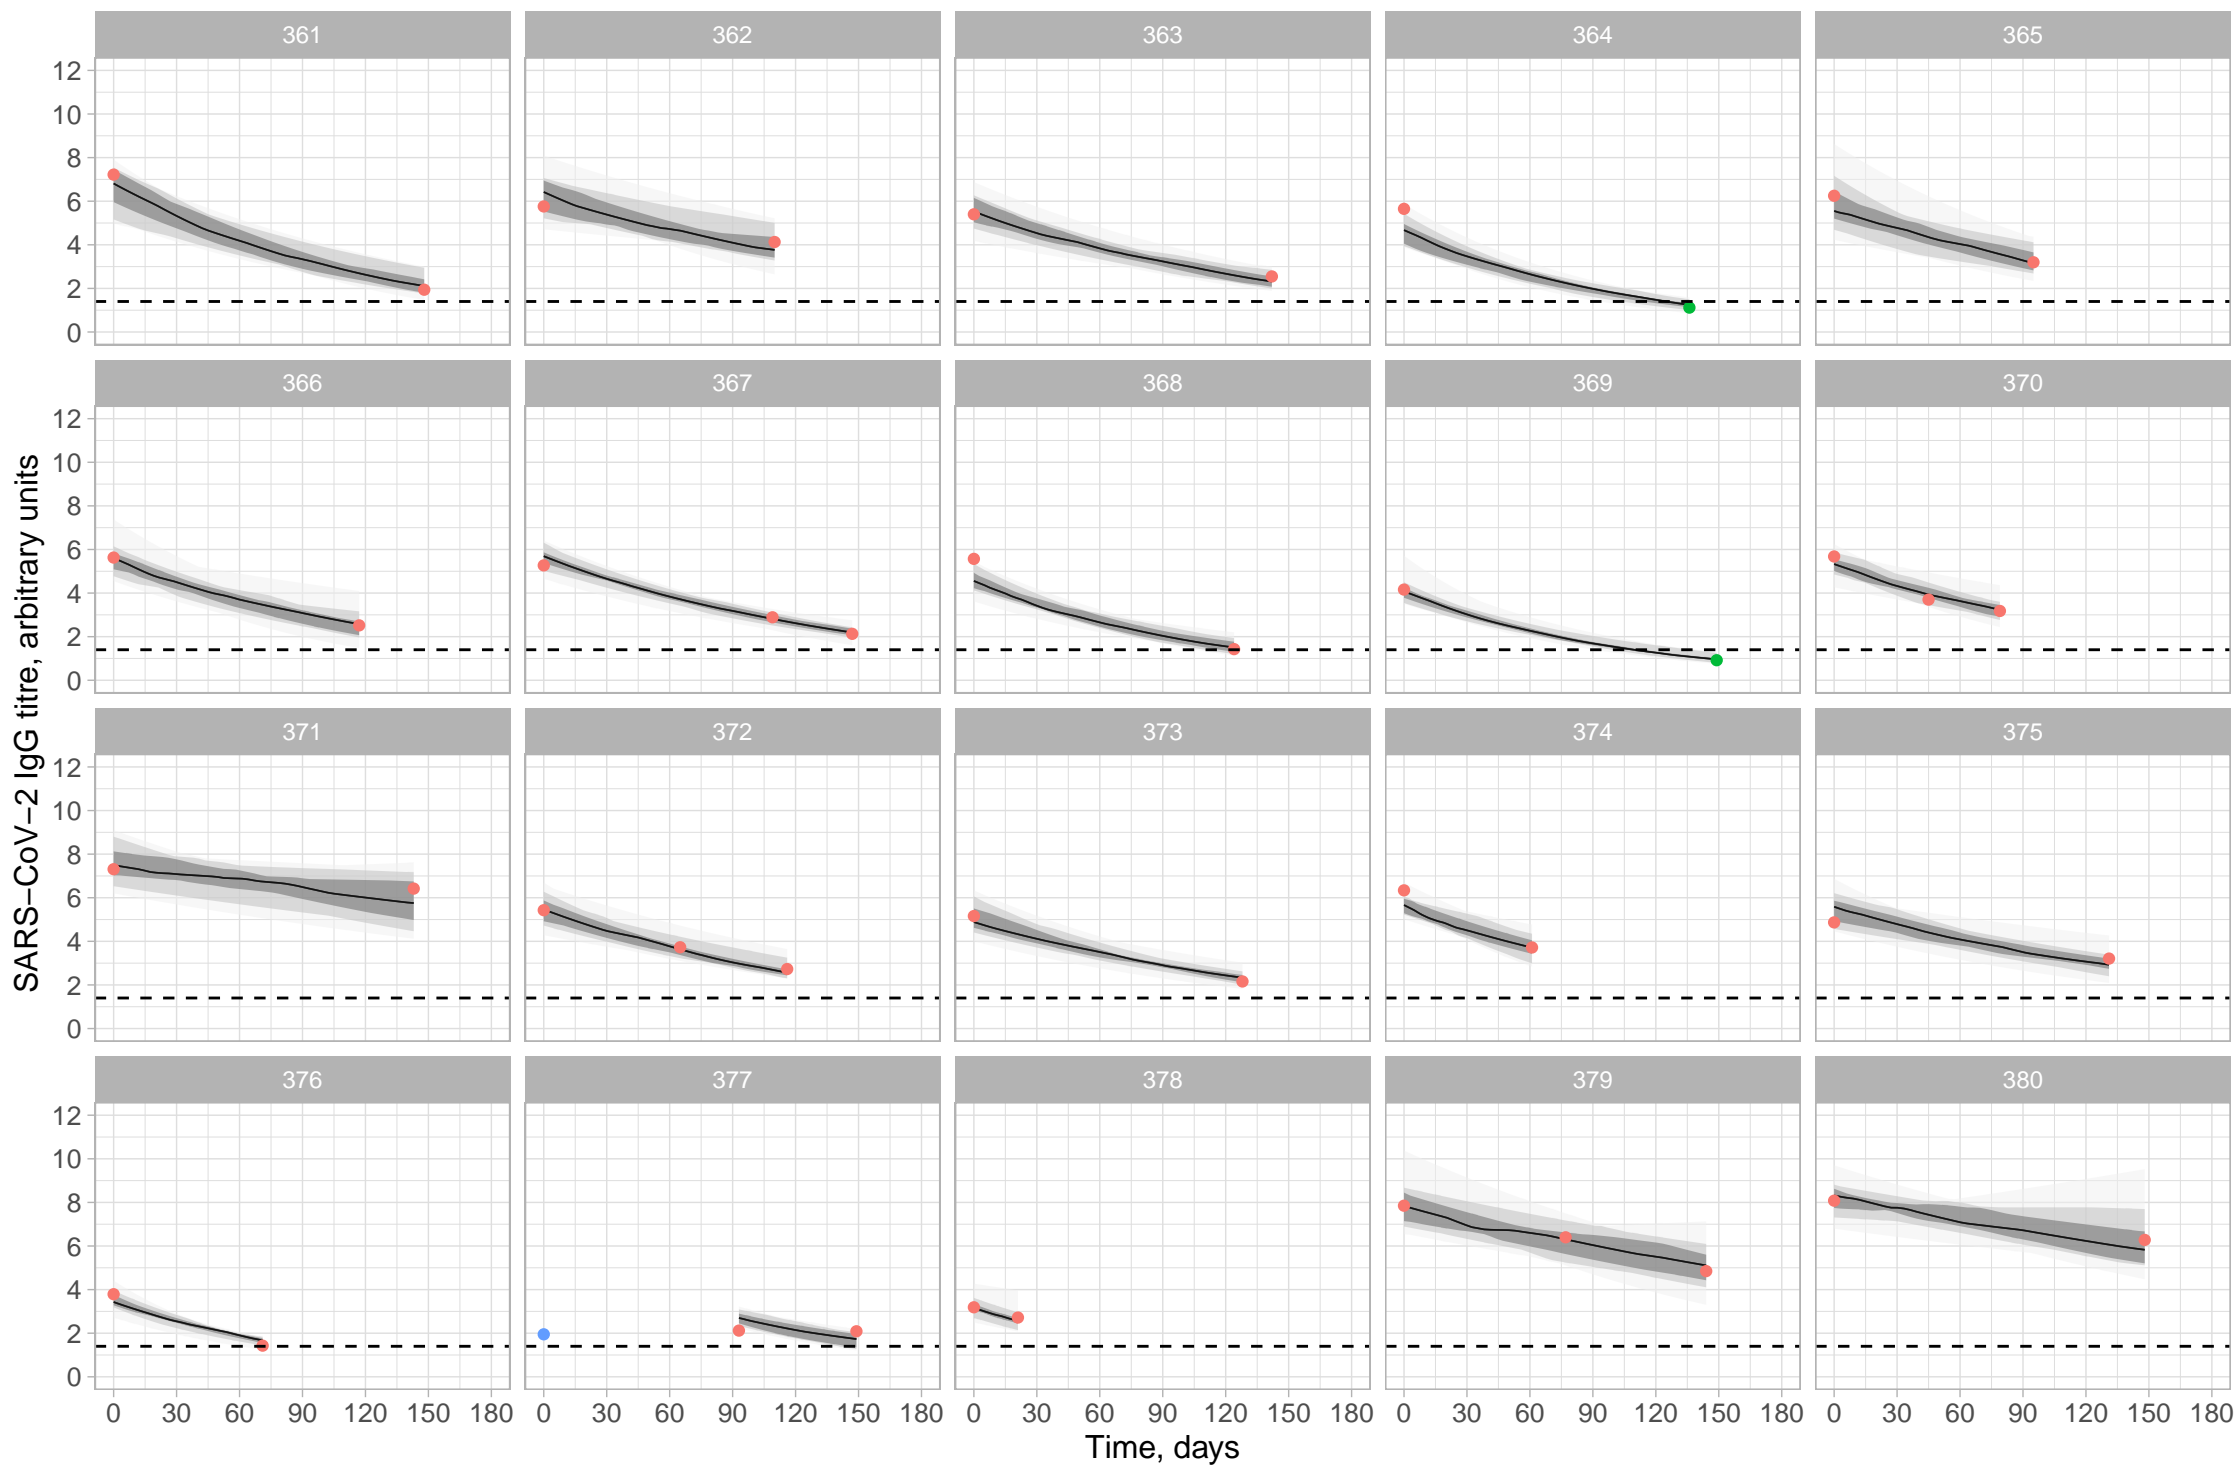

● IgG positive ● IgG negative ● Exclude (before maximum titre)

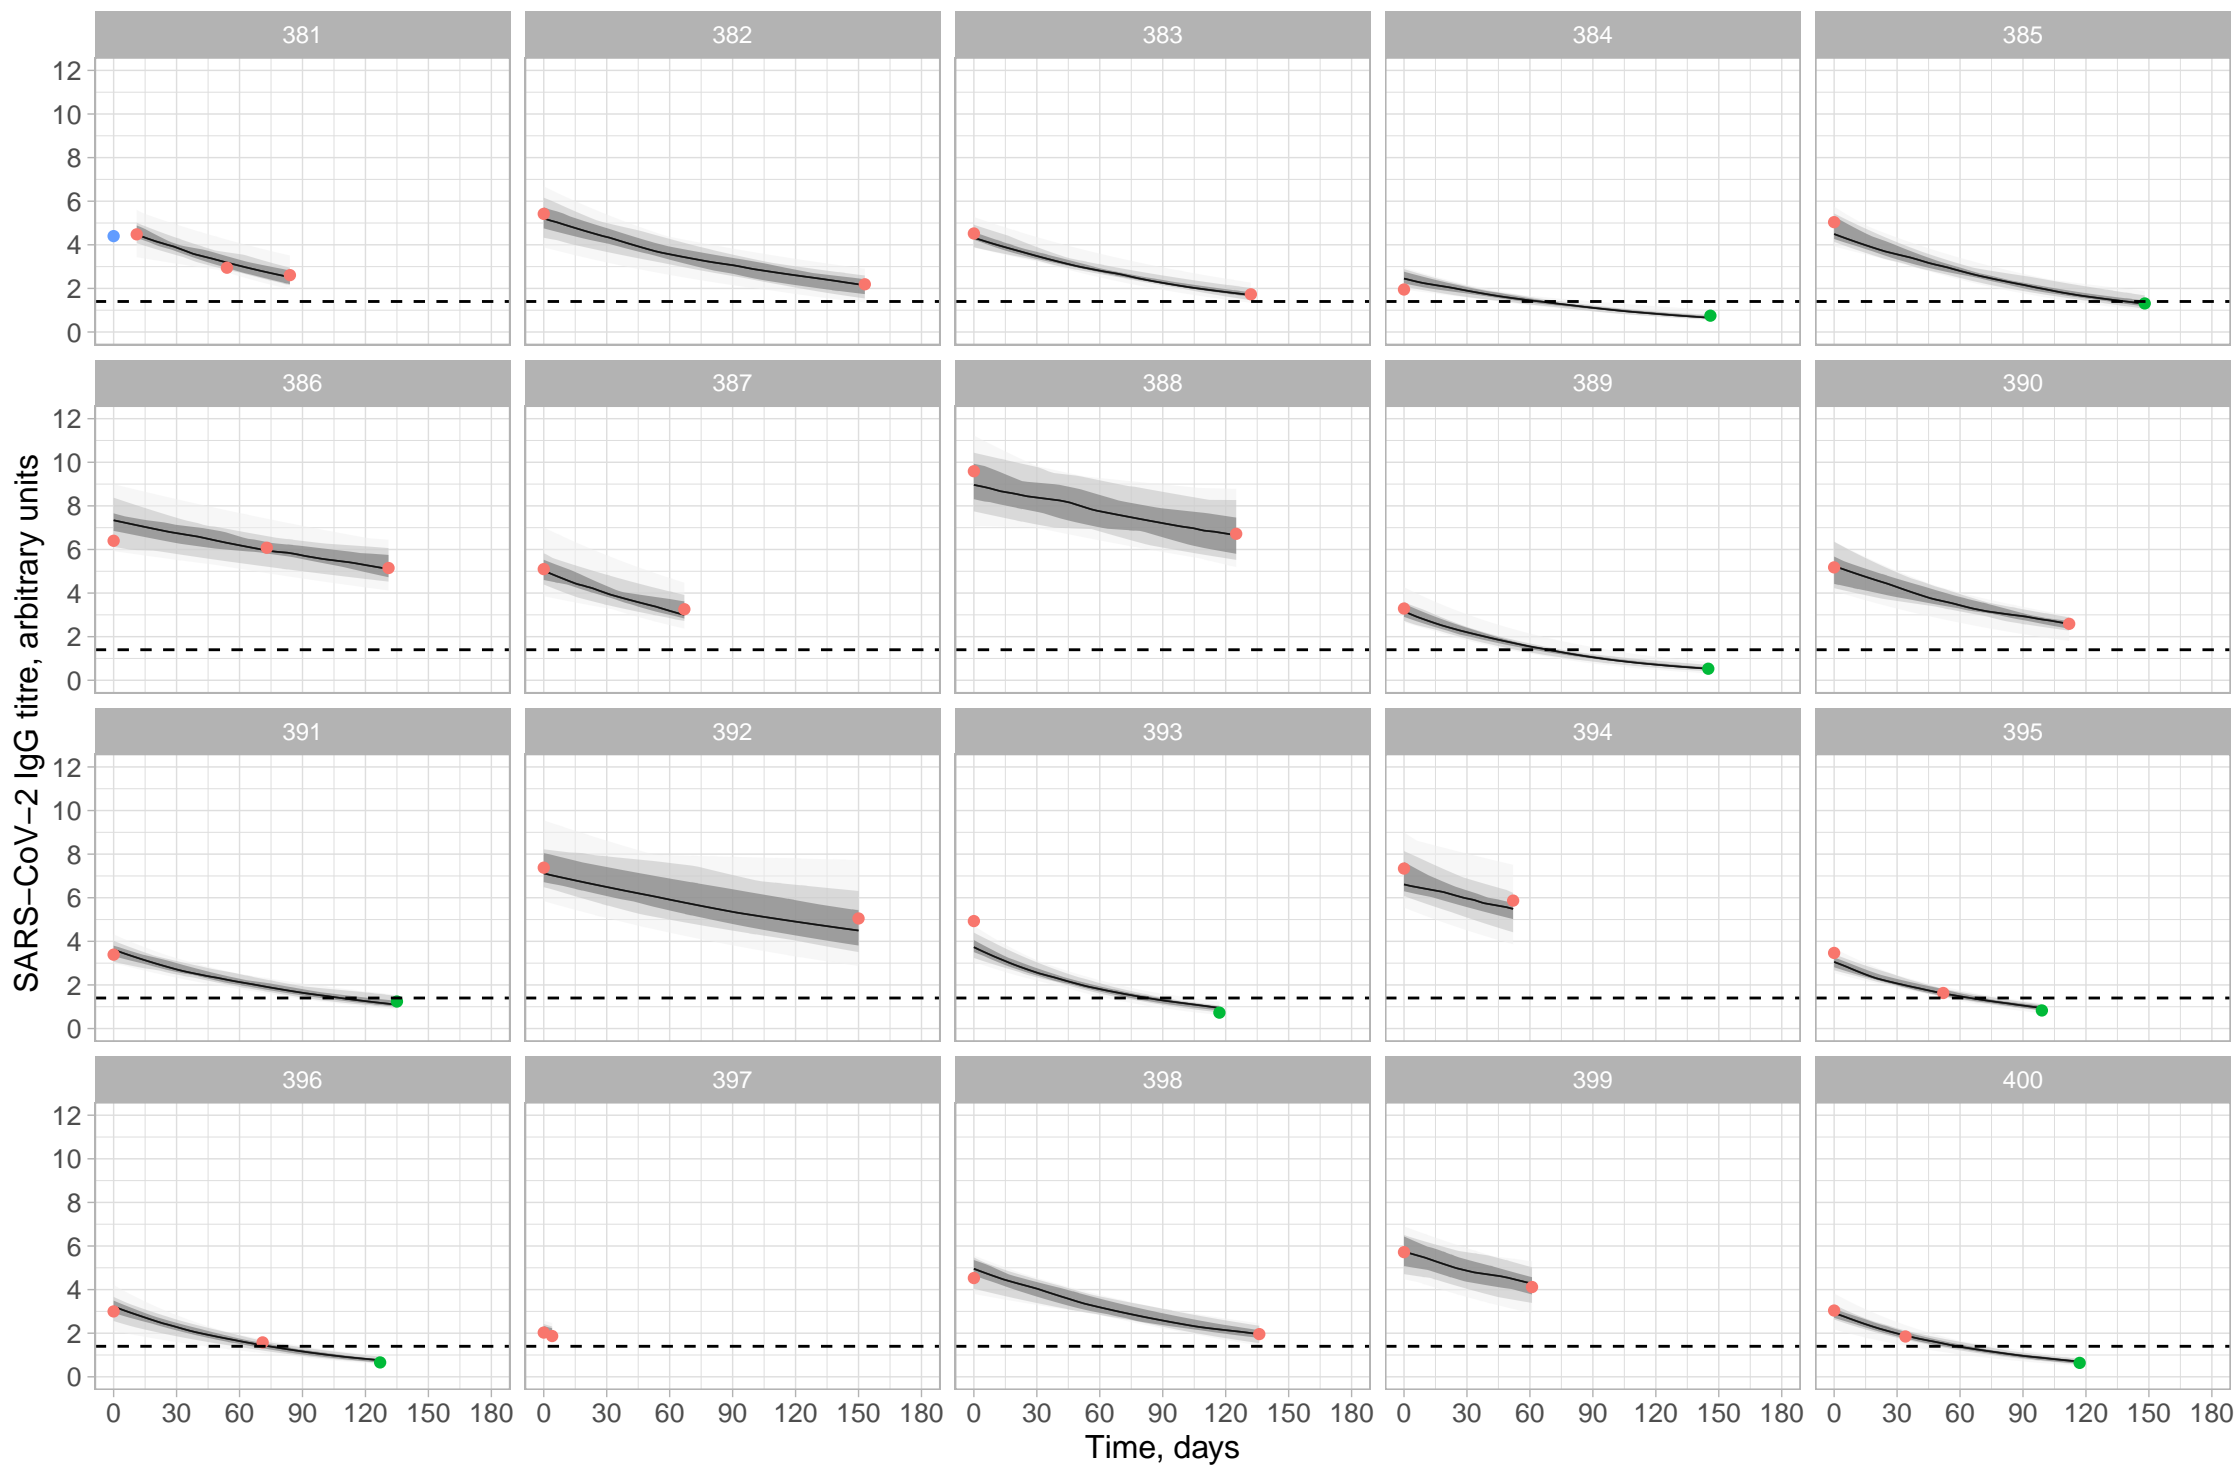

● IgG positive ● IgG negative ● Exclude (before maximum titre)

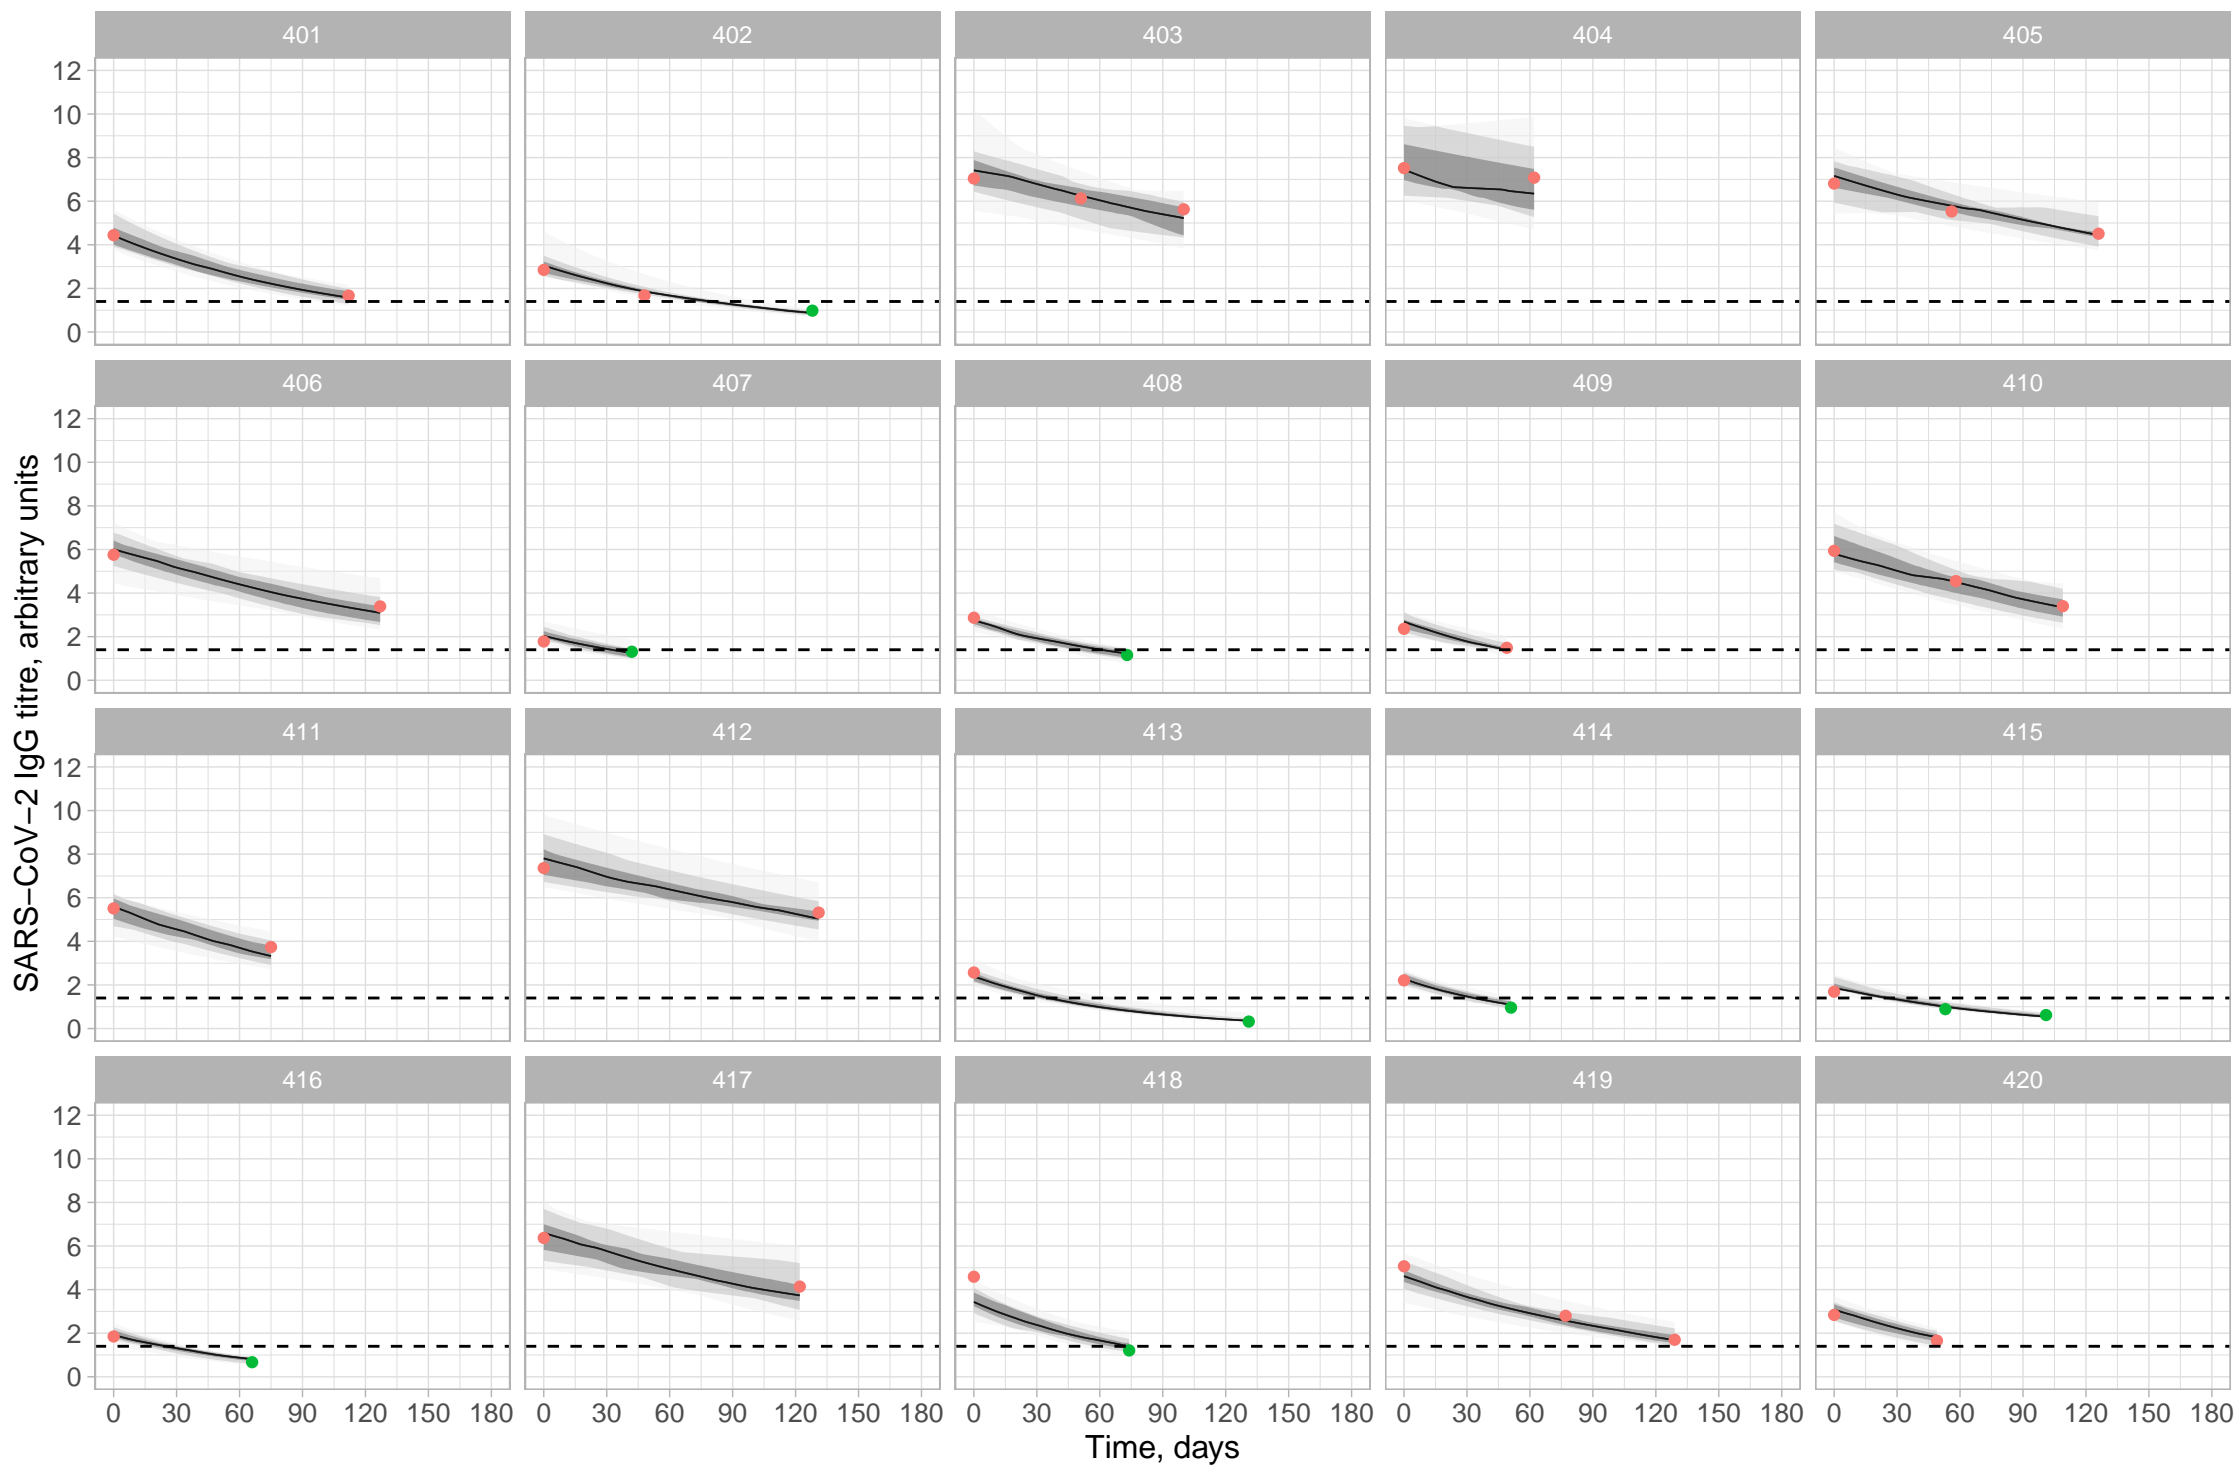

● IgG positive ● IgG negative ● Exclude (before maximum titre)

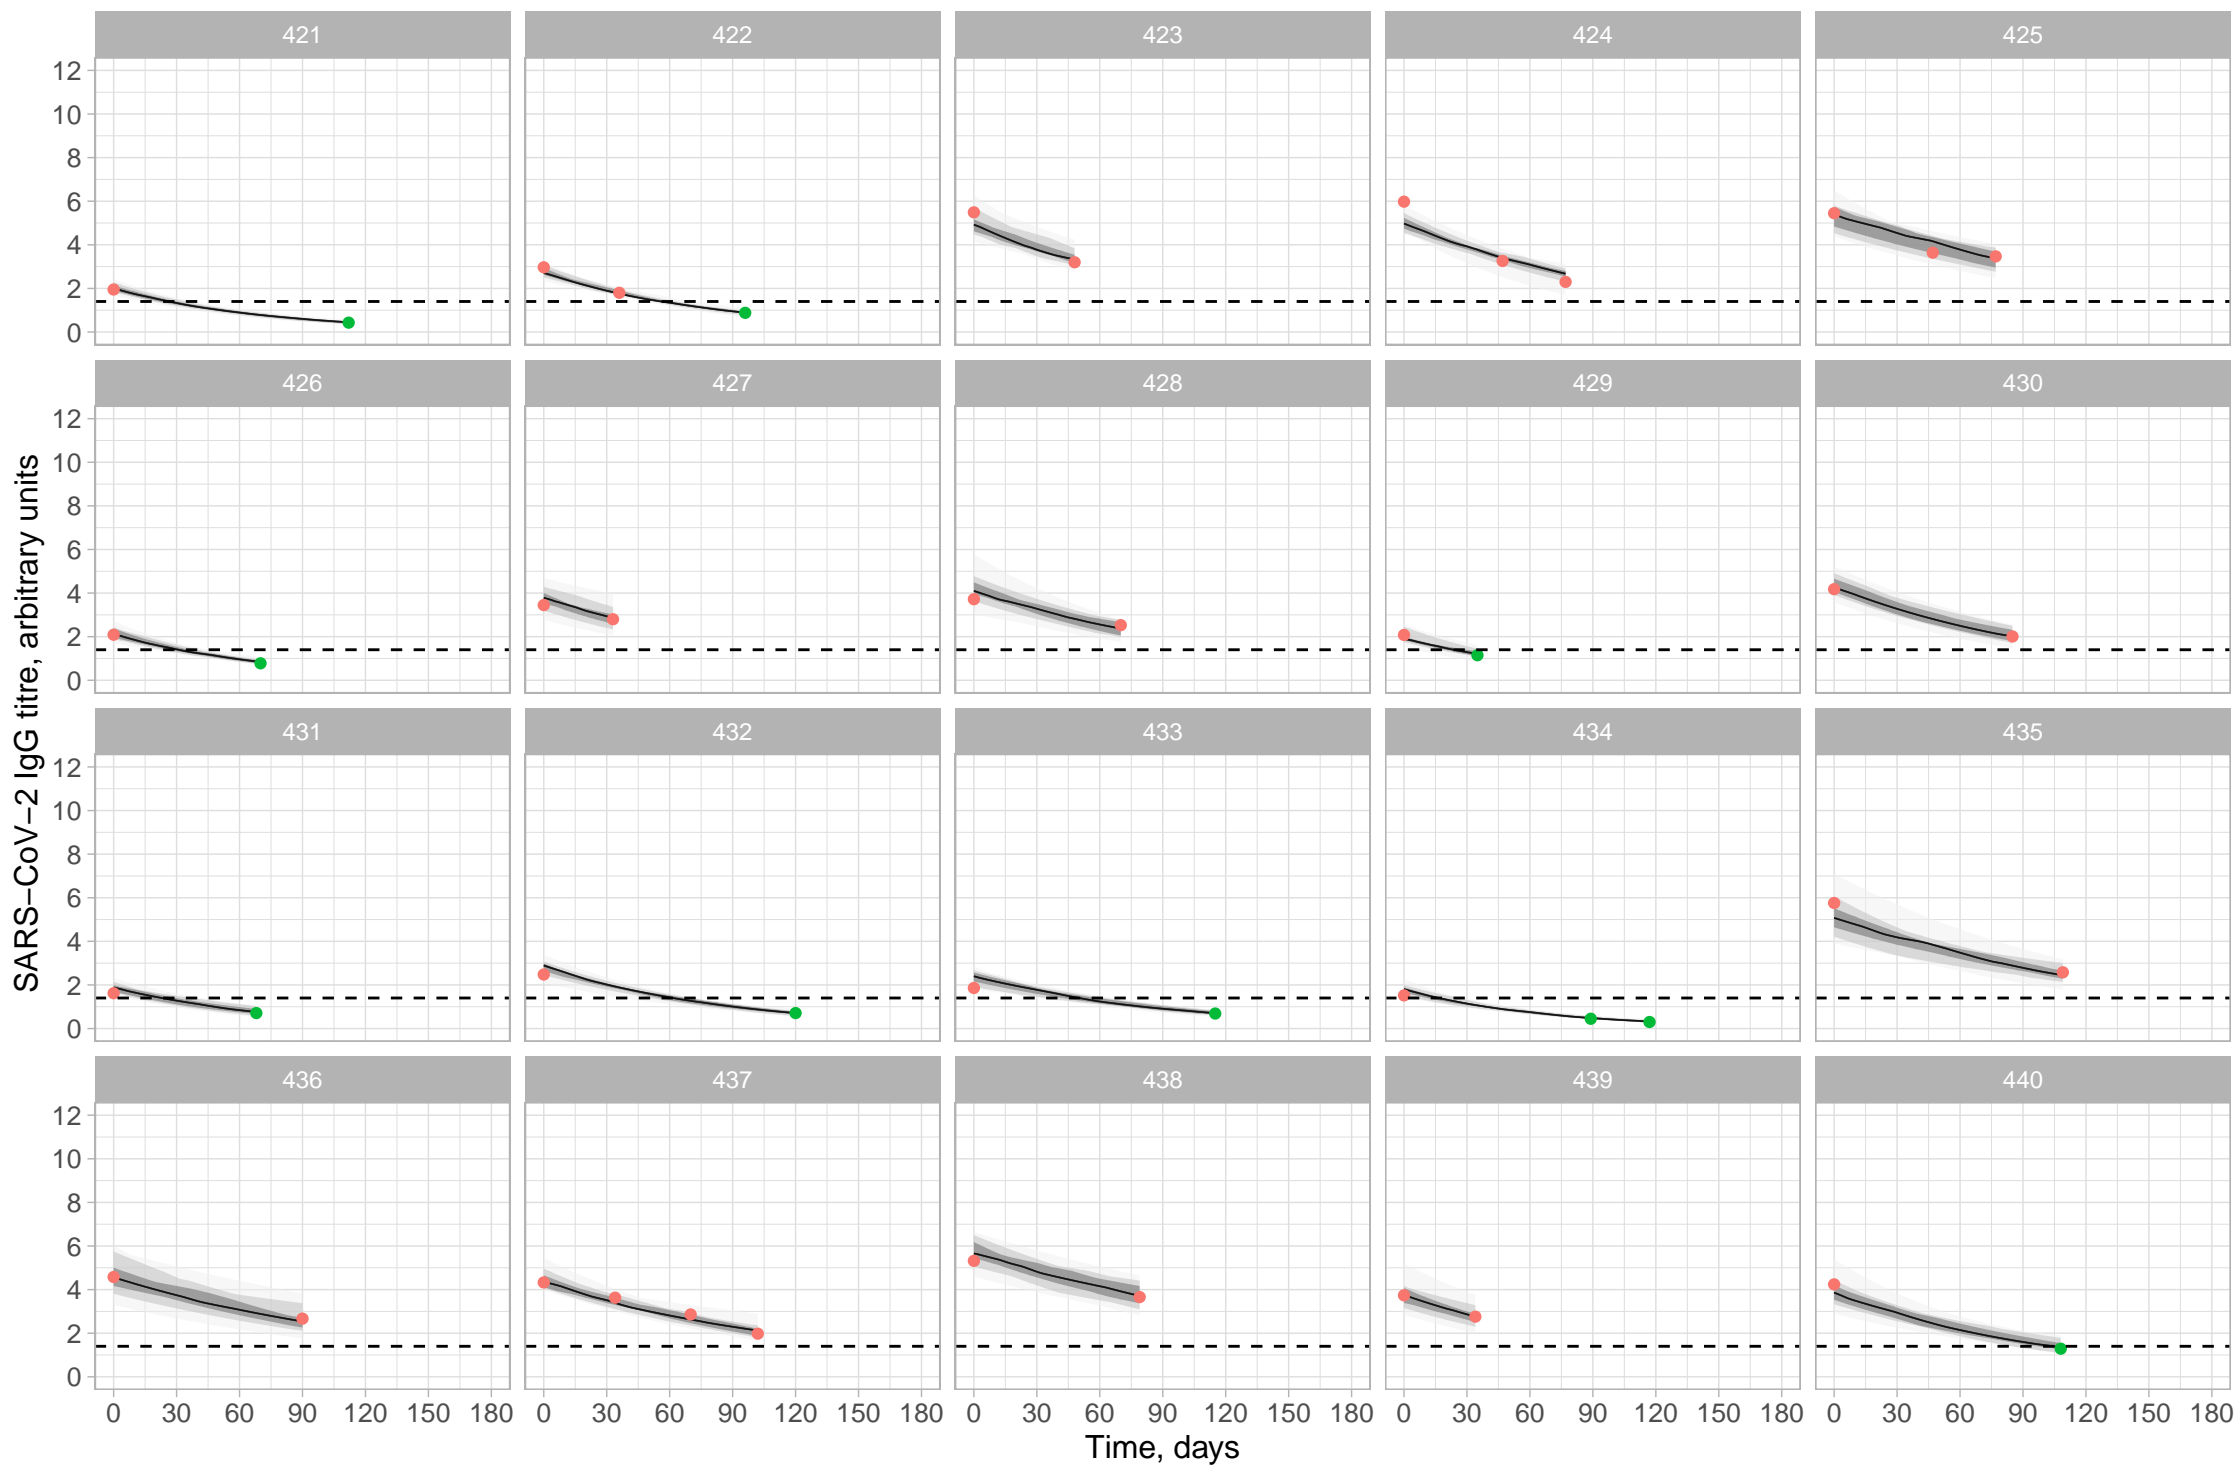

● IgG positive ● IgG negative ● Exclude (before maximum titre)

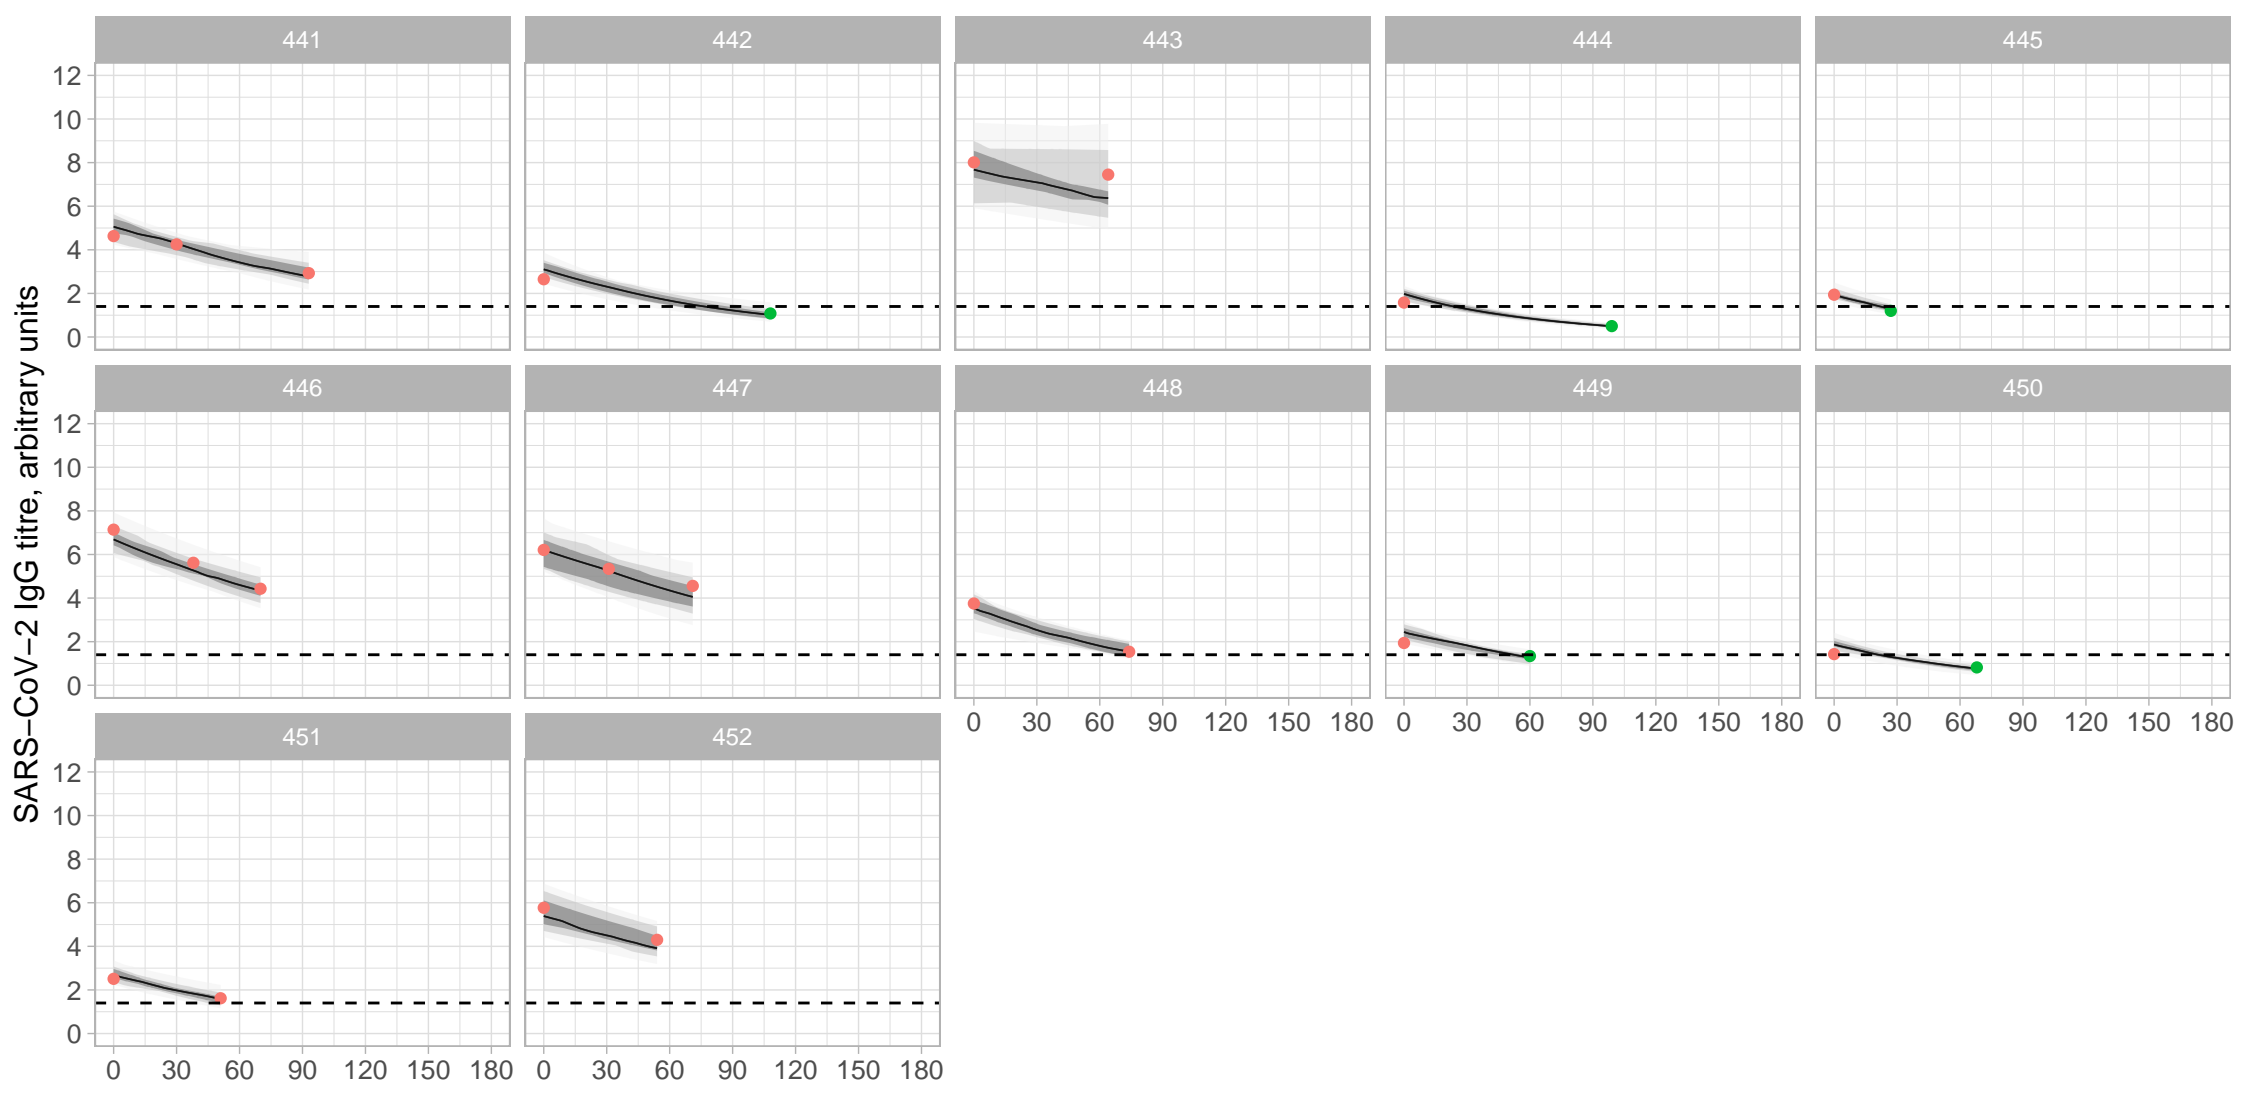

Time, days
